# Supplementary material
Source: publisher figshare collection journal article supplement (https://gsapubs.figshare.com/ndownloader/files/22885508)
Supplement: Supplementary file 1 [file 22885508]

## Sheet: Supp. Mat. S1
Supplementary Material Data Set S1 for 'Elevated magma fluxes delver high-Cu magmas to the upper crust'
Daniel Cox, Sebastian F. L. Watt, Frances E. Jenner, Alan R. Hastie, Samantha J. Hammond, Barbara E. Kunz
Correspondence: D.Cox@bham.ac.uk
This Supplementary Material file presents raw major and rare earth element and Cu and Ag analyses used in the current study. Further information can be obtained from the corresponding author.
			Sample location		MAJOR ELEMENTS (wt.%)														TRACE ELEMENTS (ppm)
Volcano	Sample ID	Sample type	Long.	Lat.	SiO2	TiO2	Al2O3	Fe2O3 (t)	MnO	MgO	CaO	Na2O	K2O	P2O5	SO3	LOI	Total		Cu	Ag	La	Ce	Pr	Nd	Sm	Eu	Gd	Tb	Dy	Ho	Er	Tm	Yb	Lu
Villarrica	16DCVill.007	Lava flow	-71.9506	-39.3835	53.3934	1.19989	17.0999	10.2146	0.166984	4.76616	9.45425	3.29692	0.795932	0.224093		-0.0381757	100.574		130.575	0.0422399	8.30561	21.0982	2.89953	13.4481	3.78012	1.16157	4.16351	0.680592	4.18372	0.893449	2.59025	0.336505	2.37961	0.368323
Villarrica	16DCVill.003	Lava flow	-71.9446	-39.3871	52.7175	1.23811	17.8662	9.93473	0.158071	5.02178	9.61358	2.95211	0.760426	0.237165		-0.149235	100.351		146.455	0.0456091	8.95137	22.5169	3.09356	14.1713	3.95895	1.20225	4.32742	0.704575	4.25156	0.9172	2.66734	0.289526	2.37307	0.374793
Villarrica	16DCVill.001	Lava flow	-71.9423	-39.3835	51.4619	1.04854	18.0507	10.9797	0.172115	4.13088	10.1937	3.20372	0.724531	0.254188		-0.279328	99.9406		139.375	0.0434029	7.9367	20.3962	2.80909	13.1326	3.70183	1.13721	4.07203	0.673681	4.10978	0.875003	2.53529	0.283521	2.28436	0.357791
Quetrupillan	16DCQuet.001	Lava flow	-71.7479	-39.4894	61.9155	1.18507	16.0164	7.54257	0.143441	1.38717	4.62005	4.79669	2.51012	0.488994		-0.0446823	100.561		26.0079	0.00367131	35.0079	77.4296	9.35463	36.9683	8.27727	1.89235	7.84493	1.21011	7.23602	1.52149	4.50016	0.594964	4.30551	0.666629
Quetrupillan	16DCQuet.003	Lava flow	-71.7486	-39.4941	61.5786	1.30076	15.0868	8.32803	0.137797	1.38731	3.58392	4.4118	3.27181	0.428357		0.00288295	99.518		24.5522	0.00112809	37.1488	81.4717	9.87648	38.8889	8.66493	1.9137	8.15594	1.25631	7.43934	1.58298	4.63666	0.607938	4.6116	0.699526
Quetrupillan	16DCQuet.005	Lava flow	-71.7473	-39.4995	56.7392	1.02927	16.8753	7.91049	0.138337	5.02609	6.85056	3.48493	2.0472	0.272276		0.0389613	100.413		41.7714	0.0214633	21.5838	47.4322	5.78118	23.1324	5.25982	1.35229	4.99346	0.779533	4.65924	0.974898	2.89162	0.378632	2.71428	0.431478
Quetrupillan	16DCQuet.006	Lava flow	-71.7512	-39.4986	63.4132	0.850325	16.2708	5.32155	0.119591	1.31943	3.48333	5.0775	2.93432	0.194012		0.15923	99.1433		15.7036	0.0166211	27.2093	57.8866	6.87657	26.7623	5.99606	1.44549	5.57971	0.885103	5.37035	1.15208	3.49357	0.485017	3.55393	0.558223
Quetrupillan	16DCQuet.007	Lava flow	-71.75	-39.4951	62.9921	1.33323	15.8534	6.83425	0.136884	1.43065	3.62197	4.75345	3.51136	0.44229		0.0486306	100.958		21.6414	0.00360882	36.9061	80.6124	9.74207	38.4324	8.64822	1.89764	8.08104	1.2435	7.43432	1.57297	4.64599	0.678651	4.5637	0.687945
Lanin	16DCLan.001	Lava flow	-71.4919	-39.5759	54.6217	1.0569	17.5419	8.9547	0.163355	4.21641	7.29454	3.26569	1.23899	0.262255		2.49786	101.114		78.8282	0.084445	18.5074	39.9673	4.90275	20.1983	4.80093	1.33824	4.61017	0.703048	4.10378	0.833501	2.38512	0.333269	2.06933	0.316357
Lanin	16DCLan.007	Lava flow	-71.5042	-39.5989	63.3672	0.935115	15.9523	6.46167	0.186606	1.17513	3.40092	5.01175	3.1921	0.384488		-0.10736	99.9599		3.86693	0.0307608	35.9162	77.2202	9.43162	37.6926	8.57656	2.22149	8.0173	1.23389	7.23086	1.52823	4.49422	0.620934	4.34388	0.679512
Lanin	16DCLan.008	Lava flow	-71.5093	-39.6024	53.1307	1.37615	17.6378	11.2596	0.190574	4.0143	7.21575	3.63808	1.71371	0.432571		-0.0494802	100.56		56.9855	0.027514	24.2953	53.3768	6.69412	27.8192	6.57967	1.77475	6.24047	0.931069	5.33568	1.10765	3.17898	0.430132	2.88354	0.437991
Lanin	16DCLan.010	Lava flow	-71.495	-39.5969	62.61	0.954258	16.2816	6.66815	0.194072	1.20421	3.42085	5.34971	3.34231	0.383177		0.00544584	100.414		3.49722	0.0323384	32.4708	70.6369	8.56534	34.5045	7.8047	2.0102	7.2378	1.11758	6.51169	1.38381	4.10837	0.62118	3.79425	0.612419
Lanin	16DCLan.011	Lava flow	-71.4911	-39.5922	61.8239	0.965848	16.4119	6.57701	0.195261	1.19709	3.48431	5.21344	3.19653	0.354129		-0.00394538	99.4154		6.24352	0.0293206	36.4696	78.574	9.59276	38.4166	8.73922	2.24031	8.17424	1.26165	7.34088	1.55834	4.58445	0.610821	4.38085	0.684564
Yate	Ya. 02-3A	Lava flow	-72.4033	-41.7042	55.3	0.926	17.49	8.2	0.142	4.92	8.03	3.27	1.166	0.202		0.04	99.686		39.1852	0.0142085	14.6817	32.8687	4.20117	18.1251	4.45385	1.22169	4.5558	0.756633	4.34933	0.931845	2.69749	0.323254	2.58268	0.386619
Yate	Ya. 23-8B	Lava flow	-72.4359	-41.7134	52.34	1.17	19.66	9.22	0.156	3.33	9.73	3.28	0.656	0.18		-0.21	99.512		55.569	0.0275775	8.90083	21.7412	2.94944	13.9355	3.93656	1.23934	4.36865	0.742817	4.41762	0.959564	2.75982	0.298897	2.66423	0.393091
Yate	Ya. 23-10A	Lava flow	-72.4426	-41.717	51.14	0.901	17.85	9.21	0.155	7.22	9.15	2.59	0.55	0.191		0.63	99.587		63.018	0.0282709	12.6273	28.3175	3.63144	15.767	3.77646	1.14252	3.81471	0.638471	3.672	0.776708	2.24115	0.283854	2.16315	0.313987
Yate	Ya. 23-12B	Lava flow	-72.4645	-41.726	52.32	1.1	20.08	8.87	0.155	3.27	9.45	3.24	0.7	0.184		0.13	99.499		49.128	0.0302924	9.08057	21.9723	3.00301	13.9652	3.85909	1.24702	4.24506	0.727822	4.24763	0.913031	2.64331	0.320978	2.62395	0.376889
Yate	Ya. 26-2A	Lava flow	-72.3468	-41.8227	62.16	0.973	15.84	6.43	0.117	2.22	5.1	3.82	2.369	0.251		1.08	100.36		25.9558	0.0304191	23.9374	52.2823	6.58165	27.5836	6.57998	1.4753	6.39835	1.07243	6.0776	1.29715	3.76398	0.451741	3.88339	0.542369
Yate	Ya. 26-3A	Lava flow	-72.3481	-41.8192	61.74	0.957	15.87	6.42	0.113	2.21	5.05	3.81	2.364	0.249		-0.15	98.633		19.5695	0.0308215	23.2944	52.202	6.4645	27.2532	6.47458	1.48218	6.35038	1.06427	6.02498	1.28939	3.72123	0.416415	3.6544	0.547105
Yate	Ya. 26-4A	Lava flow	-72.3487	-41.8229	54.78	1.058	15.55	8.35	0.146	5.72	7.97	3.08	2.523	0.386		0.06	99.623		67.8102	0.0265914	24.6765	57.4239	7.82377	35.4637	9.00438	2.3054	8.21705	1.19351	6.20988	1.2052	3.31213	0.42183	3.0995	0.439308
Yate	Ya. 26-6A	Lava flow	-72.3619	-41.8659	56.22	0.78	16.21	7.65	0.133	5.67	7.98	2.95	1.536	0.165		0.14	99.434		42.974	0.025553	17.5693	36.9365	4.52609	18.9863	4.44913	1.16058	4.23368	0.686168	3.93952	0.838222	2.38998	0.283662	2.33569	0.349411
Yate	Ya. 26-7A	Lava flow	-72.37	-41.88	56.17	0.755	16.04	7.59	0.137	5.7	8.11	2.85	1.514	0.158		-0.04	98.984		62.2849	0.0284515	18.3015	37.5622	4.61325	19.247	4.43868	1.17794	4.23573	0.686333	3.86832	0.827314	2.40043	0.311923	2.3741	0.345854
Yate	Ya. 26-5AY	Fall deposit	-72.345	-41.851	65.54	0.6	14.95	4.44	0.087	1.54	3.68	4.18	2.657	0.07		1.42	99.164		8.72266	0.0311601	21.6855	44.1208	5.16987	20.3683	4.59741	1.03142	4.28909	0.744729	4.37767	0.958107	2.84891	0.410145	3.05623	0.455701
Apagado	Ap. 20-4A	Lava flow	-72.5944	-41.8793	51.35	0.962	18.18	9.46	0.157	6.74	9.11	2.7	0.541	0.2		0.24	99.64		60.0161	0.0283284	9.21473	22.8329	3.05675	13.5386	3.53355	1.13035	3.6861	0.582259	3.51499	0.730525	2.08646	0.261275	1.81829	0.290053
Apagado	Ap. 20-5A	Lava flow	-72.6073	-41.8799	50.12	1.013	18.72	9.59	0.16	6.47	9.87	2.78	0.456	0.225		0.23	99.634		66.7687	0.0277062	12.5916	28.3894	3.70349	15.9585	3.9149	1.2659	4.1003	0.636059	3.83127	0.798358	2.27466	0.227324	1.98318	0.314225
Apagado	Ap. 21-2A	Lava flow	-72.5947	-41.8802	51.25	0.953	17.88	9.46	0.158	7.09	9.71	2.79	0.505	0.178		-0.27	99.704		67.7803	0.0337853	8.26835	20.0929	2.72151	12.6831	3.34755	1.07936	3.52127	0.60346	3.42474	0.738959	2.09652	0.253924	2.0319	0.292844
Apagado	Ap. 21-3A	Lava flow	-72.5939	-41.8793	50.65	0.961	17.94	9.54	0.157	7.25	9.73	2.61	0.446	0.174		-0.01	99.448		65.5189	0.0311251	8.20899	20.2174	2.72095	12.625	3.38275	1.09162	3.57907	0.591281	3.44921	0.731737	2.08544	0.207761	1.99388	0.290216
Apagado	Ap. 21-4A	Lava flow	-72.5939	-41.8792	49.2	0.947	17.43	9.38	0.159	7.62	9.51	2.66	0.422	0.198		-0.03	97.496		57.9107	0.0215037	11.3418	25.8666	3.38936	14.6003	3.64366	1.15663	3.75165	0.592774	3.56088	0.740092	2.12145	0.214707	1.88516	0.296604
Apagado	Ap. 21-6B	Lava flow	-72.616	-41.8724	54.61	1.191	17.39	9.01	0.154	3.97	8.51	3.17	1.02	0.237		0.47	99.732		89.0624	0.0360403	12.239	29.5457	3.97414	18.0208	5.00679	1.31391	5.48775	0.902169	5.48987	1.14962	3.31914	0.423837	3.00899	0.46393
Apagado	Ap. 21-9B	Lava flow	-72.6411	-41.85	52.32	0.956	19.83	8.54	0.133	3.86	9.9	3.01	0.356	0.128		0.35	99.383		64.6715	0.0404924	6.49627	13.1823	2.13788	10.3262	2.91879	1.00243	3.28372	0.564575	3.31975	0.710618	2.03745	0.236055	1.94549	0.281657
Apagado	Ap. 21-9C	Lava flow	-72.6411	-41.85	54.5	1.024	18.36	8.58	0.148	4.28	8.21	3.57	0.67	0.223		0.23	99.795		41.9614	0.0280517	9.32098	22.5176	3.12849	14.348	3.95405	1.26224	4.39162	0.715964	4.34732	0.901592	2.60103	0.280917	2.33524	0.367101
Hornopiren	Ho. 05-3B	Fall deposit	-72.4286	-41.8781	52.96	0.962	17.29	8.86	0.149	4.79	8.65	2.95	0.952	0.28		0.35	98.193		59.2536	0.0187951	18.583	45.2287	5.25692	22.3789	5.20012	1.3979	5.0561	0.815126	4.65737	0.973023	2.76211	0.380479	2.68676	0.395475
Hornopiren	Ho. 15-5A	Lava flow	-72.4697	-41.8914	53.46	0.949	17.38	8.88	0.152	5.44	8.77	2.9	0.946	0.299		-0.09	99.086		62.0225	0.0208933	18.6215	41.7155	5.24782	21.7074	4.99242	1.38495	4.92457	0.742246	4.37448	0.899607	2.59355	0.358656	2.30855	0.359366
Hornopiren	Ho. 19-1A	Lava flow	-72.4342	-41.8595	53.13	0.923	17.51	8.82	0.152	5.37	8.87	2.9	0.905	0.278		-0.2	98.658		61.7855	0.0306785	17.6977	39.3359	4.97076	21.1549	4.9046	1.34017	4.69573	0.757199	4.29939	0.898913	2.5729	0.360989	2.39275	0.363529
Hornopiren	Ho. 30-2A	Lava flow	-72.4639	-41.8706	53.05	0.932	17.56	8.87	0.151	5.48	8.96	2.86	0.886	0.274		-0.22	98.803		60.1555	0.0300867	17.2565	37.8815	4.7904	20.3758	4.78308	1.30588	4.63043	0.743575	4.24744	0.88991	2.5343	0.330988	2.44313	0.365627
San Pedro	SAN PEDRO/SAN PABLO 001	Lava flow	-68.5105	-21.9342	63.2268	0.780272	15.8956	5.066	0.0746566	2.25243	4.22024	4.23135	3.31885	0.245473	<0.001	0.776925	100.089		38.5047	0.0584135	29.7254	61.0207	7.05146	26.6722	5.41044	1.15977	4.531	0.648562	3.58193	0.685517	1.9038		1.77945	0.249988
San Pedro	SAN PEDRO/SAN PABLO 007	Lava flow	-68.5025	-21.9329	62.4615	0.799957	15.7186	5.08449	0.0784307	2.14621	4.54386	4.26983	3.02818	0.350034	0.141487	1.17298	99.7955		52.1316	0.120035	29.7514	61.8752	7.14593	26.9787	5.49017	1.15691	4.57864	0.663388	3.61512	0.696739	1.90793		1.76742	0.251673
San Pedro	SAN PEDRO/SAN PABLO 011	Lava flow	-68.4847	-21.9341	63.2546	0.792045	15.9476	5.06671	0.0765112	2.13312	4.19855	4.29759	3.19344	0.251334	0.00365691	1.02561	100.241		32.5257	0.0593799	31.0405	64.5733	7.41618	27.7523	5.72601	1.19599	4.61782	0.671127	3.68531	0.714775	1.95419		1.8627	0.252931
Ollague	OLLAGUE 001	Lava flow	-68.2312	-21.2716	66.8542	0.524929	14.9733	3.42387	0.0435146	1.08891	2.60721	4.02548	3.59351	0.163716	0.00997586	1.80076	99.1094		8.07466	0.0740015	42.2724	81.8789	9.04536	32.5245	6.11253	1.33324	4.23465	0.508343	2.28975	0.360867	0.843234		0.663487	0.0899906
Ollague	OLLAGUE 003	Lava flow	-68.2313	-21.2869	59.6206	0.893194	17.1845	6.54545	0.0933712	2.68211	5.54238	4.16273	2.40829	0.243025	<0.001	0.449158	99.8248		13.912	0.0550569	32.4022	61.8718	7.86635	30.5478	6.22982	1.61138	5.13243	0.732535	3.87808	0.7367	1.90727		1.76128	0.236377
Ollague	OLLAGUE 005	Lava flow	-68.2337	-21.2941	62.1827	0.807829	16.4026	5.25553	0.0712904	2.33146	4.59345	3.75258	3.01461	0.242297	0.00730153	1.18774	99.8494		10.1223	0.0520022	35.2267	67.9827	8.15753	30.338	6.00606	1.37417	4.67501	0.629763	3.10579	0.545857	1.38678		1.15483	0.159427
Ollague	OLLAGUE 006B	Lava flow	-68.2678	-21.3038	60.2961	0.881498	17.4502	5.78734	0.0828756	2.48263	5.19916	4.17352	2.68136	0.253157	<0.001	0.731577	100.019		13.8679	0.0746749	33.3543	66.8233	7.78477	29.374	5.74565	1.4979	4.58508	0.61848	3.13856	0.55589	1.40612		1.21602	0.161753
Ollague	P002	Lava flow	-68.2871	-21.3211	59.8964	0.921002	17.2849	6.05653	0.0838427	2.37577	5.34365	4.2092	2.66638	0.259474	<0.001	0.796981	99.8942		12.3498	0.0260204	31.722	64.4245	7.50544	28.606	5.72735	1.52836	4.66967	0.63005	3.17558	0.568292	1.44032		1.16798	0.161118
Ollague	P003	Lava flow	-68.2831	-21.3176	60.8455	0.818961	16.6076	5.4724	0.0796327	2.28684	5.23151	4.21081	2.63075	0.246129	0.19488	0.943114	99.5682		18.4849	0.0664096	34.9282	66.1973	8.04691	30.4431	5.88555	1.4649	4.73645	0.635314	3.21697	0.591808	1.46751		1.25707	0.169986
Ollague	P004	Lava flow	-68.2824	-21.3166	60.8845	0.810892	16.8444	5.49862	0.0816683	2.28886	5.05428	4.19459	2.81759	0.241793	0.0475727	0.952107	99.7169		16.4093	0.0787823	32.8536	65.7269	7.5281	28.162	5.42927	1.3877	4.2352	0.571246	2.93562	0.530378	1.37131		1.20397	0.16251
Ollague	P005	Lava flow	-68.2779	-21.3171	60.8521	0.824106	16.7274	5.77429	0.0788853	2.74169	5.13628	4.11647	2.7364	0.217738	<0.001	0.601297	99.8067		17.6475	0.0478555	29.4042	58.3656	6.77031	25.6958	5.28833	1.34385	4.27852	0.585294	3.00662	0.539047	1.38352		1.15029	0.15742
Ollague	P006	Lava flow	-68.2739	-21.3175	59.8893	0.824052	17.0372	5.54605	0.0813867	2.34202	5.39487	4.00326	2.9654	0.251716	0.024616	1.29183	99.6518		10.8734	0.0724183	34.1523	66.9132	7.75427	28.7624	5.54311	1.40241	4.41582	0.592362	3.03425	0.547705	1.41123		1.17697	0.169251
Ollague	P006A	Lava flow	-68.2739	-21.3175	59.8336	0.826332	16.6708	5.62247	0.0811628	2.44214	5.53019	3.8501	3.13528	0.241369	0.00818278	1.56479	99.8064		14.5121	0.0682277	32.1463	64.5901	7.55154	28.3887	5.57733	1.45465	4.49833	0.602389	3.08256	0.553806	1.41725		1.24085	0.170957

## Sheet: Supp. Mat. S2
Supplementary Material Data Set S2 for 'Elevated magma fluxes delver high-Cu magmas to the upper crust'
Daniel Cox, Sebastian F. L. Watt, Frances E. Jenner, Alan R. Hastie, Samantha J. Hammond, Barbara E. Kunz
Correspondence: D.Cox@bham.ac.uk
This Supplementary Material file presents preferred values and avergae raw analyses for the International Reference Materials (ISRM)
used in the acquisition of major and trace element analysis of all samples in the current study.
Raw analyses and preferred values for ISRMs used in the acquisition of major element analyses.																			Average trace element analyses and preferred values for the ISRM BHVO-2 used in the acquisition of Cu, Ag and Rare Earth Element analyses.
																			(Please refer to Fig. S1 for a display on the repeatabilty of the ISRM analyses).
CARDIFF UNIVERSITY, ICP-OES/MS (2017) - International Standard Reference Materials																				Mass		63	107	139	140	141	146	147	153	157	159	163	165	166	172	175
(wt.%)	JB-1a	Certified1	Certified2	JA-2	Certified1	Certified2	JG-1a	Certified1												Element		Cu	Ag	La	Ce	Pr	Nd	Sm	Eu	Gd	Tb	Dy	Ho	Er	Yb	Lu
SiO2	52.6216	52.16	52.56	57.827	56.18	56.39	72.9391	72.19
TiO2	1.32332	1.3	1.29	0.677006	0.67	0.6695	0.23504	0.25											Pref values BHVO-2 (OU)			129.3	0.03063	15.2	37.53	5.339	24.27	6.023	2.043	6.207	0.9392	5.28	0.9887	2.511	1.994	0.2754
Al2O3	14.2893	14.51	14.51	15.4537	15.32	15.51	14.1659	14.22
Fe2O3	9.22487	9.1	8.996	6.69488	6.14	6.289	2.08938	2.05											Run Jan '18		Average	136.247	0.0288282	15.8386	38.5583	5.22999	23.6164	6.31033	2.08323	6.47906	0.985822	5.3483	1.0213	2.62533	1.90018	0.278196
MnO	0.151489	0.15	0.1419	0.107357	0.11	0.1092	0.0581412	0.06											BHVO-2 09.11.17		RSD	0.629124	6.01751	0.343836	0.332323	0.121611	0.178321	1.85522	1.68861	1.65599	1.78095	0.690019	1.37192	1.11003	1.16559	1.82672
MgO	7.71554	7.75	7.81	7.42826	7.68	7.841	0.594226	0.69
CaO	9.13555	9.23	9.314	6.22119	6.48	6.259	2.03973	2.13													Av/Pref	0.949015	1.0625	0.959679	0.973331	1.02084	1.02768	0.954467	0.98069	0.95801	0.952707	0.98723	0.968084	0.956453	1.04937	0.98995
Na2O	2.82833	2.74	2.738	3.10581	3.08	3.072	3.60273	3.41
K2O	1.45035	1.42	1.407	1.79318	1.8	1.779	4.02727	4.01											Run Jan '18		Average	128.15	0.0296484	15.4836	37.2139	5.11146	23.6555	6.2125	2.0413	6.31996	0.994783	5.32821	1.01765	2.61875	2.05959	0.282263
P2O5	0.247733	0.25	0.261	0.157604	0.15	0.1519	0.0699815	0.08											BHVO-2 09.11.17		RSD	1.19044	4.37595	0.674778	0.407766	0.559141	1.18943	1.3531	0.748903	0.729222	1.95904	0.510375	1.7174	1.61624	3.23653	1.45172
SO3
LOI	0.78	0.78		0.8	0.8		0.5	0.5													Av/Pref	1.00898	1.03311	0.981685	1.00849	1.04452	1.02598	0.969496	1.00083	0.982127	0.944125	0.990953	0.971554	0.958854	0.968154	0.975687
Total	99.7681	99.39	99.0279	100.266	98.41	98.0706	100.322	99.59
1Govindaraju, 1994. 1994 compilation of working values and descriptions for 383 geostandards. Geostandards Newsletter, 18, 1-158.																			Run March '19		Average	134.898	0.0333497	15.8752	38.5036	5.23598	23.577	6.21229	2.10327	6.32682	0.965785	5.36725	1.00895	2.58974	2.0623	0.276383
2Jochum et al., 2016. Reference values following ISO guidelines for frequently requested rock reference materials. Geostandards and Geoanalytical Research, 40, 333-350																			BHVO-2 (19)		RSD	0.866248	2.3364	1.34518	1.16242	1.12294	0.967833	1.05347	1.12704	0.402813	0.529616	0.797067	1.11364	1.04916	3.40163	1.11154
JB-1a, basalt; JA-2, andesite; JG-1a, granodiorite																					Av/Pref	0.958502	0.918449	0.957468	0.974715	1.01967	1.02939	0.96953	0.971345	0.981061	0.972473	0.983743	0.979927	0.969595	0.966883	0.996444
																			OU: The Open University - source of preferred values for the ISRM BHVO-2
UNIVERSITY OF EDINBURGH, XRF (2017) - International Standard Reference Materials
(wt.%)	JA2 avg.	Certified1	JR1 avg.	Certified1	BHVO-1 avg.	Certified1
SiO2	57.3733	56.18	75.5667	75.4	49.8333	49.94
TiO2	0.672333	0.67	0.108667	0.1	2.71967	2.71
Al2O3	15.9833	15.32	12.82	12.89	13.6667	13.8
Fe2O3	6.18333	6.14	0.833333	0.96	12.2933	12.23
MnO	0.105333	0.11	0.096	0.1	0.168667	0.168
MgO	7.33667	7.68	0.163333	0.09	7.08	7.23
CaO	6.28333	6.48	0.693333	0.63	11.4467	11.4
Na2O	3.11667	3.08	4.14	4.1	2.45333	2.26
K2O	1.85367	1.8	4.47533	4.41	0.524333	0.52
P2O5	0.153667	0.15	0.019	0.02	0.289	0.273
SO3
LOI
Total	99.0617	97.61	98.9157	98.7	100.475	100.531
1Govindaraju, 1994. 1994 compilation of working values and descriptions for 383 geostandards. Geostandards Newsletter, 18, 1-158.
JA2, andesite; JR-1, rhyolite, BHVO-1, basalt
UNIVERSITY OF LEICESTER, XRF (2018) - International and Internal Standard Reference Materials
(wt.%)	BH-1	Certified1	WS-1	Certified2	BCS375	Certified3	BCS376	Certified3
SiO2	68.5008	-	51.2736	51.07	67.1132	67.1	67.0707	67.1
TiO2	0.378109	-	2.27295	2.428	0.350181	0.38	0.00859339	-
Al2O3	14.1431	-	13.5723	13.77	19.713	19.8	17.5884	17.7
Fe2O3	5.76234	-	13.5314	13.09	0.114638	0.12	0.0984062	0.1
MnO	0.138113	-	0.175218	0.1701	0.00206139	0.003	0.00206139	0.002
MgO	2.45513	-	4.97958	5.63	0.00324896	0.05	-0.00541494	0.03
CaO	3.00501	-	8.49302	8.996	0.717338	0.89	0.405876	0.54
Na2O	3.31189	-	2.48949	2.481	9.1155	10.4	2.51958	2.83
K2O	0.743614	-	1.15301	0.9961	0.671912	0.79	11.2317	11.18
P2O5	0.0773785	-	0.311694	0.3042	0.0348748	-	0.0261561	-
SO3	0.0816532	-	0.141692	-	0.0792517	-	0.0684446	-
LOI	-	-	-	-	-	-	-	-
Total	98.5971	-	98.3939	-	97.9152	-	99.0145	-
(wt.%)	ARSiO2	Certified4	ARAl2O3	Certified4	MRG-1	Certified5	NIM-D	Certified6
SiO2	100.431	-	0.132811	-	38.9742	39.12	38.4621	38.96
TiO2	0.00537087	-	0.00751922	-	3.8434	3.77	0.0290027	0.02
Al2O3	0.0329906	-	99.8098	-	8.16738	8.47	0.762083	0.3
Fe2O3	0.00405799	-	0.00710148	-	18.3644	17.94	17.2444	16.96
MnO	-0.00103069	-	-0.00103069	-	0.159758	0.17	0.23809	0.22
MgO	-0.00649793	-	-0.0238257	-	13.2904	13.55	43	43.51
CaO	0.00542616	-	0.00434092	-	14.6723	14.7	0.325569	0.28
K2O	0.0115648	-	0.00809533	-	0.176941	0.18	0.0289119	0.01
P2O5	0.0141679	-	0.0141679	-	0.0686598	0.08	0.0250663	0.01
SO3	0.0456297	-	0.0492321	-	0.225747	-	0.198129	-
LOI	-	-	-	-	-	-	-	-
Total	100.717	-	100.1	-	98.7178	-	100.382	-
(wt.%)	BCS372/1	Certified3
SiO2	19.7602	20.3
TiO2	0.252431	0.27
Al2O3	5.06406	5.37
Fe2O3	3.40769	3.42
MnO	0.0401971	-
MgO	1.19995	1.31
CaO	65.6022	65.3
Na2O	0.249618	0.1
K2O	0.676538	0.75
P2O5	0.0904566	0.07
SO3	3.00436	-
LOI	-	-
Total	99.3477	-
1University of Leicester internal standard reference material
2In-house preparation (i.e., University of Leicester)
3Bureau of Analysed Samples
4University of Leicester internal spiked sample
5Canada Centre for Mineral and Energy Technology (CANMET), Canadian Certified Reference Materials Project (CCRMP)
6Council for Mineral Technology (MINTEK), SA Bureau of Standards
BH-1, diorite; WS-1, dolerite [comparable to WS-E]; BCS375/1, soda feldspar powder; BCS376/1, potash feldspar powder; ARSiO2, Si; ARAl2O3, Al; MRG-1, gabbro; NIM-D, dunite; BCS372/1, ordinary portland cement

## Sheet: Supp. Mat. S3
Supplementary Material Data Set S3 for 'Elevated magma fluxes delver high-Cu magmas to the upper crust'
Daniel Cox, Sebastian F. L. Watt, Frances E. Jenner, Alan R. Hastie, Samantha J. Hammond, Barbara E. Kunz
Correspondence: D.Cox@bham.ac.uk
This Supplementary Material file presents SiO2, MgO and Cu analyses filtered from the Andean Arc databases; sourced from the Geochemical Database GeoROC (Geochemistry of Rocks of the Oceans and Continents). Further information can be obtained from the corresponding author.
Although the Andean Arc databases (parts 1 and 2) contain a vast quantity of compositional data, whole rock Cu anlayses are not commonly presented. Thus, those analyses not presenting Cu data were removed.
The remaining analyses were filtered to only include whole rock analyses of volcanic rocks from named stratovolcanoes. Analyses of metamorphic and sedimentary rocks, pegmatites, plutonics, veins, ores, mantle xenoliths, minerals, glass and inclusoins were removed.
Stratovolcano	SiO2 (wt.%)	MgO (wt.%)	Cu (ppm)
ANDEAN ARC / CENTRAL ANDEAN VOLCANIC ZONE / CHILE / AJOYA-CHOQUELIMPIE	73.6	0.18	13
ANDEAN ARC / CENTRAL ANDEAN VOLCANIC ZONE / CHILE / AJOYA-CHOQUELIMPIE	73	0.37	22
ANDEAN ARC / CENTRAL ANDEAN VOLCANIC ZONE / CHILE / AJOYA-CHOQUELIMPIE	60.1	2.39	46
ANDEAN ARC / CENTRAL ANDEAN VOLCANIC ZONE / CHILE / APACHETA	59.49	2.21	22
ANDEAN ARC / CENTRAL ANDEAN VOLCANIC ZONE / CHILE / APACHETA	54.78	3.09	34
ANDEAN ARC / CENTRAL ANDEAN VOLCANIC ZONE / CHILE / APACHETA-AGUILUCHO VOLCANIC COMPLEX	63.92	2.07	9.3
ANDEAN ARC / CENTRAL ANDEAN VOLCANIC ZONE / CHILE / APACHETA-AGUILUCHO VOLCANIC COMPLEX	59.62	3.32	10
ANDEAN ARC / CENTRAL ANDEAN VOLCANIC ZONE / CHILE / APACHETA-AGUILUCHO VOLCANIC COMPLEX	63.33	1.92	11
ANDEAN ARC / CENTRAL ANDEAN VOLCANIC ZONE / CHILE / APACHETA-AGUILUCHO VOLCANIC COMPLEX	62.1	2.25	12
ANDEAN ARC / CENTRAL ANDEAN VOLCANIC ZONE / CHILE / APACHETA-AGUILUCHO VOLCANIC COMPLEX	63.15	2.07	12
ANDEAN ARC / CENTRAL ANDEAN VOLCANIC ZONE / CHILE / APACHETA-AGUILUCHO VOLCANIC COMPLEX	62.8	2.1	16
ANDEAN ARC / CENTRAL ANDEAN VOLCANIC ZONE / CHILE / APACHETA-AGUILUCHO VOLCANIC COMPLEX	61.31	2.27	17
ANDEAN ARC / CENTRAL ANDEAN VOLCANIC ZONE / CHILE / APACHETA-AGUILUCHO VOLCANIC COMPLEX	63.85	1.86	17
ANDEAN ARC / CENTRAL ANDEAN VOLCANIC ZONE / CHILE / APACHETA-AGUILUCHO VOLCANIC COMPLEX	62.08	2.3	17
ANDEAN ARC / CENTRAL ANDEAN VOLCANIC ZONE / CHILE / APACHETA-AGUILUCHO VOLCANIC COMPLEX	64.65	2.05	18
ANDEAN ARC / CENTRAL ANDEAN VOLCANIC ZONE / CHILE / APACHETA-AGUILUCHO VOLCANIC COMPLEX	68.44	1.15	19
ANDEAN ARC / CENTRAL ANDEAN VOLCANIC ZONE / CHILE / APACHETA-AGUILUCHO VOLCANIC COMPLEX	59.99	3.37	20
ANDEAN ARC / CENTRAL ANDEAN VOLCANIC ZONE / CHILE / APACHETA-AGUILUCHO VOLCANIC COMPLEX	66.92	1.54	20
ANDEAN ARC / CENTRAL ANDEAN VOLCANIC ZONE / CHILE / APACHETA-AGUILUCHO VOLCANIC COMPLEX	61.02	3.29	20
ANDEAN ARC / CENTRAL ANDEAN VOLCANIC ZONE / CHILE / APACHETA-AGUILUCHO VOLCANIC COMPLEX	64.8	1.71	20
ANDEAN ARC / CENTRAL ANDEAN VOLCANIC ZONE / CHILE / APACHETA-AGUILUCHO VOLCANIC COMPLEX	57.33	3.66	20
ANDEAN ARC / CENTRAL ANDEAN VOLCANIC ZONE / CHILE / APACHETA-AGUILUCHO VOLCANIC COMPLEX	63.98	2.11	20
ANDEAN ARC / CENTRAL ANDEAN VOLCANIC ZONE / CHILE / APACHETA-AGUILUCHO VOLCANIC COMPLEX	57.06	4.01	24
ANDEAN ARC / CENTRAL ANDEAN VOLCANIC ZONE / CHILE / APACHETA-AGUILUCHO VOLCANIC COMPLEX	59.97	3.97	25
ANDEAN ARC / CENTRAL ANDEAN VOLCANIC ZONE / CHILE / APACHETA-AGUILUCHO VOLCANIC COMPLEX	57.33	4.68	30
ANDEAN ARC / CENTRAL ANDEAN VOLCANIC ZONE / CHILE / APACHETA-AGUILUCHO VOLCANIC COMPLEX	61.69	3.1	30
ANDEAN ARC / CENTRAL ANDEAN VOLCANIC ZONE / CHILE / APACHETA-AGUILUCHO VOLCANIC COMPLEX	56.22	3.18	33
ANDEAN ARC / CENTRAL ANDEAN VOLCANIC ZONE / CHILE / APACHETA-AGUILUCHO VOLCANIC COMPLEX	57.23	4.01	40
ANDEAN ARC / CENTRAL ANDEAN VOLCANIC ZONE / CHILE / APACHETA-AGUILUCHO VOLCANIC COMPLEX	62.05	2.29	40
ANDEAN ARC / CENTRAL ANDEAN VOLCANIC ZONE / CHILE / APACHETA-AGUILUCHO VOLCANIC COMPLEX	58.49	1.29	45
ANDEAN ARC / CENTRAL ANDEAN VOLCANIC ZONE / CHILE / ARARAL	61.64	2.59	21
ANDEAN ARC / CENTRAL ANDEAN VOLCANIC ZONE / CHILE / ARARAL	61.12	2.94	22
ANDEAN ARC / CENTRAL ANDEAN VOLCANIC ZONE / CHILE / ARARAL	58.8	2.7	24
ANDEAN ARC / CENTRAL ANDEAN VOLCANIC ZONE / CHILE / ARINTICA	62.84	1.97	25
ANDEAN ARC / CENTRAL ANDEAN VOLCANIC ZONE / CHILE / ARINTICA	60.75	2.56	37
ANDEAN ARC / CENTRAL ANDEAN VOLCANIC ZONE / CHILE / ASCOTAN	63.21	2.32	21
ANDEAN ARC / CENTRAL ANDEAN VOLCANIC ZONE / CHILE / ASCOTAN	63.24	2.38	27
ANDEAN ARC / CENTRAL ANDEAN VOLCANIC ZONE / CHILE / ASCOTAN	61.67	2.8	41
ANDEAN ARC / CENTRAL ANDEAN VOLCANIC ZONE / CHILE / AUCANQUILCHA VOLCANIC CLUSTER	63.24	2.47	45
ANDEAN ARC / CENTRAL ANDEAN VOLCANIC ZONE / CHILE / AUCANQUILCHA VOLCANIC CLUSTER	62.73	1.53	112
ANDEAN ARC / CENTRAL ANDEAN VOLCANIC ZONE / CHILE / AZUFRE	61.59	3.05	19
ANDEAN ARC / CENTRAL ANDEAN VOLCANIC ZONE / CHILE / AZUFRE	60.05	3.81	28
ANDEAN ARC / CENTRAL ANDEAN VOLCANIC ZONE / CHILE / BONETO CHICO	65.23	1.87	21
ANDEAN ARC / CENTRAL ANDEAN VOLCANIC ZONE / CHILE / BONETO CHICO	64.84	1.71	22
ANDEAN ARC / CENTRAL ANDEAN VOLCANIC ZONE / CHILE / BONETO CHICO	60.82	3.58	39
ANDEAN ARC / CENTRAL ANDEAN VOLCANIC ZONE / CHILE / CAQUENA	61	2.17	42
ANDEAN ARC / CENTRAL ANDEAN VOLCANIC ZONE / CHILE / CAQUENA	56.8	3.21	54
ANDEAN ARC / CENTRAL ANDEAN VOLCANIC ZONE / CHILE / CAQUENA	55.9	3.58	61
ANDEAN ARC / CENTRAL ANDEAN VOLCANIC ZONE / CHILE / CEBOLLAR	61.57	2.2	3.88095
ANDEAN ARC / CENTRAL ANDEAN VOLCANIC ZONE / CHILE / CERRO CARCOTE	58.06	3.82	2.70732
ANDEAN ARC / CENTRAL ANDEAN VOLCANIC ZONE / CHILE / CERRO CARCOTE	55.14	4.99	41
ANDEAN ARC / CENTRAL ANDEAN VOLCANIC ZONE / CHILE / CERRO CARCOTE	58.6	3.05	43
ANDEAN ARC / CENTRAL ANDEAN VOLCANIC ZONE / CHILE / CERRO CARCOTE	56.05	4.17	44
ANDEAN ARC / CENTRAL ANDEAN VOLCANIC ZONE / CHILE / CERRO CARCOTE	59.23	3.04	45
ANDEAN ARC / CENTRAL ANDEAN VOLCANIC ZONE / CHILE / CERRO CEBOLLAR	61.57	2.2	22
ANDEAN ARC / CENTRAL ANDEAN VOLCANIC ZONE / CHILE / CERRO CEBOLLAR	61.76	1.94	25
ANDEAN ARC / CENTRAL ANDEAN VOLCANIC ZONE / CHILE / CERRO CHELA	71.8	0.25	8
ANDEAN ARC / CENTRAL ANDEAN VOLCANIC ZONE / CHILE / CERRO CHELA	59.96	2.31	41
ANDEAN ARC / CENTRAL ANDEAN VOLCANIC ZONE / CHILE / CERRO CHELA	57.08	4.67	82
ANDEAN ARC / CENTRAL ANDEAN VOLCANIC ZONE / CHILE / CERRO COLORADO	63.1	2.53	16.3
ANDEAN ARC / CENTRAL ANDEAN VOLCANIC ZONE / CHILE / CERRO COLORADO	62.4	2.69	21.0117
ANDEAN ARC / CENTRAL ANDEAN VOLCANIC ZONE / CHILE / CERRO COLORADO	56.4	3.94	43.2
ANDEAN ARC / CENTRAL ANDEAN VOLCANIC ZONE / CHILE / CERRO COLORADO	51.06	9.06	44
ANDEAN ARC / CENTRAL ANDEAN VOLCANIC ZONE / CHILE / CERRO LA QUEBRADA	57.75	5.82	19
ANDEAN ARC / CENTRAL ANDEAN VOLCANIC ZONE / CHILE / CERRO LAS CUEVAS	52.96	6.18	48
ANDEAN ARC / CENTRAL ANDEAN VOLCANIC ZONE / CHILE / CERRO LAS CUEVAS	59.74	3.83	54
ANDEAN ARC / CENTRAL ANDEAN VOLCANIC ZONE / CHILE / CERRO PALPANA	58	3.63	52
ANDEAN ARC / CENTRAL ANDEAN VOLCANIC ZONE / CHILE / CERRO PALPANA	58.07	2.98	60
ANDEAN ARC / CENTRAL ANDEAN VOLCANIC ZONE / CHILE / CERRO PALPANA	59.27	2.14	69
ANDEAN ARC / CENTRAL ANDEAN VOLCANIC ZONE / CHILE / CERRO PALPANA	58.06	3.75	74
ANDEAN ARC / CENTRAL ANDEAN VOLCANIC ZONE / CHILE / CERRO PALPANA	57.06	2.61	89
ANDEAN ARC / CENTRAL ANDEAN VOLCANIC ZONE / CHILE / CERRO SAIRECABUR	60.5	3.1	2.68989
ANDEAN ARC / CENTRAL ANDEAN VOLCANIC ZONE / CHILE / CERRO SAIRECABUR	63.01	2.69	10
ANDEAN ARC / CENTRAL ANDEAN VOLCANIC ZONE / CHILE / CERRO SAIRECABUR	64.86	2.21	10
ANDEAN ARC / CENTRAL ANDEAN VOLCANIC ZONE / CHILE / CERRO SAIRECABUR	61.5	2.5	20.0434
ANDEAN ARC / CENTRAL ANDEAN VOLCANIC ZONE / CHILE / CERRO SAIRECABUR	58.87	2.44	22
ANDEAN ARC / CENTRAL ANDEAN VOLCANIC ZONE / CHILE / CERRO SAIRECABUR	56.67	3.88	23
ANDEAN ARC / CENTRAL ANDEAN VOLCANIC ZONE / CHILE / CERRO SAIRECABUR	63	2.66	32.6752
ANDEAN ARC / CENTRAL ANDEAN VOLCANIC ZONE / CHILE / CERRO SAIRECABUR	62.6	2.74	49
ANDEAN ARC / CENTRAL ANDEAN VOLCANIC ZONE / CHILE / CHANCA	66.16	1.71	5.63379
ANDEAN ARC / CENTRAL ANDEAN VOLCANIC ZONE / CHILE / CHELA	71.8	0.25	2.37311
ANDEAN ARC / CENTRAL ANDEAN VOLCANIC ZONE / CHILE / CHELA	57.08	4.67	3.18421
ANDEAN ARC / CENTRAL ANDEAN VOLCANIC ZONE / CHILE / CHELA	60.6	2.8	35
ANDEAN ARC / CENTRAL ANDEAN VOLCANIC ZONE / CHILE / CHELA	56.49	4.11	60
ANDEAN ARC / CENTRAL ANDEAN VOLCANIC ZONE / CHILE / CHELA	57.83	3.9	62
ANDEAN ARC / CENTRAL ANDEAN VOLCANIC ZONE / CHILE / CHELA	55.81	3.97	67
ANDEAN ARC / CENTRAL ANDEAN VOLCANIC ZONE / CHILE / CHELA	54.61	3.86	69
ANDEAN ARC / CENTRAL ANDEAN VOLCANIC ZONE / CHILE / CHELA	56.65	3.83	71
ANDEAN ARC / CENTRAL ANDEAN VOLCANIC ZONE / CHILE / CHUCULLO (CHUCUYO)	58.1	3.2	45
ANDEAN ARC / CENTRAL ANDEAN VOLCANIC ZONE / CHILE / CORDON INACALIRI	62.54	2.73	37
ANDEAN ARC / CENTRAL ANDEAN VOLCANIC ZONE / CHILE / DOMO CHANCA	61.68	3.05	13
ANDEAN ARC / CENTRAL ANDEAN VOLCANIC ZONE / CHILE / DOMO CHANCA	66.16	1.71	15
ANDEAN ARC / CENTRAL ANDEAN VOLCANIC ZONE / CHILE / DOMO CHANCA	65.24	1.6	25
ANDEAN ARC / CENTRAL ANDEAN VOLCANIC ZONE / CHILE / EL FRAILE	64.66	1.95	16
ANDEAN ARC / CENTRAL ANDEAN VOLCANIC ZONE / CHILE / EL MUERTO	60.15	3.77	31
ANDEAN ARC / CENTRAL ANDEAN VOLCANIC ZONE / CHILE / EL NEGRILLAR	63.7	2.24	37
ANDEAN ARC / CENTRAL ANDEAN VOLCANIC ZONE / CHILE / EL NEGRILLAR	62.1	2.04	37
ANDEAN ARC / CENTRAL ANDEAN VOLCANIC ZONE / CHILE / EL NEGRILLAR	59.8	3.26	39
ANDEAN ARC / CENTRAL ANDEAN VOLCANIC ZONE / CHILE / EL NEGRILLAR	62.9	2.67	60
ANDEAN ARC / CENTRAL ANDEAN VOLCANIC ZONE / CHILE / EL NEGRILLAR	54.3	7.68	69
ANDEAN ARC / CENTRAL ANDEAN VOLCANIC ZONE / CHILE / EL NEGRILLAR	64.1	2	76
ANDEAN ARC / CENTRAL ANDEAN VOLCANIC ZONE / CHILE / EL NEGRILLAR	62.8	2.3	123
ANDEAN ARC / CENTRAL ANDEAN VOLCANIC ZONE / CHILE / EL NEGRILLAR	57.5	4.07	126
ANDEAN ARC / CENTRAL ANDEAN VOLCANIC ZONE / CHILE / EL ROJO NORTE	54.12	4.69	3.22702
ANDEAN ARC / CENTRAL ANDEAN VOLCANIC ZONE / CHILE / EL VOLCAN	61.5	3.5	20
ANDEAN ARC / CENTRAL ANDEAN VOLCANIC ZONE / CHILE / GUALLATIRI	74.17	0.28	2
ANDEAN ARC / CENTRAL ANDEAN VOLCANIC ZONE / CHILE / GUALLATIRI	61.55	2.15	11
ANDEAN ARC / CENTRAL ANDEAN VOLCANIC ZONE / CHILE / GUALLATIRI	62.74	2.2	13
ANDEAN ARC / CENTRAL ANDEAN VOLCANIC ZONE / CHILE / GUALLATIRI	62.44	2.44	24
ANDEAN ARC / CENTRAL ANDEAN VOLCANIC ZONE / CHILE / GUALLATIRI	60.55	2.79	33
ANDEAN ARC / CENTRAL ANDEAN VOLCANIC ZONE / CHILE / GUALLATIRI	62.54	2.52	33
ANDEAN ARC / CENTRAL ANDEAN VOLCANIC ZONE / CHILE / GUALLATIRI	57.37	3.57	50
ANDEAN ARC / CENTRAL ANDEAN VOLCANIC ZONE / CHILE / HUAILLA	59.86	2.24	3.15403
ANDEAN ARC / CENTRAL ANDEAN VOLCANIC ZONE / CHILE / INCAPILLO CALDERA / FANDANGO DOME	63.97	2.08	15
ANDEAN ARC / CENTRAL ANDEAN VOLCANIC ZONE / CHILE / INCAPILLO CALDERA / FANDANGO DOME	64.16	1.86	17
ANDEAN ARC / CENTRAL ANDEAN VOLCANIC ZONE / CHILE / INCAPILLO CALDERA / INCAPILLO DOME	70	0.66	8
ANDEAN ARC / CENTRAL ANDEAN VOLCANIC ZONE / CHILE / INCAPILLO CALDERA / INCAPILLO DOME	67.83	1.26	9
ANDEAN ARC / CENTRAL ANDEAN VOLCANIC ZONE / CHILE / INCAPILLO CALDERA / INCAPILLO DOME	68.09	1.19	11
ANDEAN ARC / CENTRAL ANDEAN VOLCANIC ZONE / CHILE / INCAPILLO CALDERA / INCAPILLO PUMICE	67.03	0.81	7
ANDEAN ARC / CENTRAL ANDEAN VOLCANIC ZONE / CHILE / INCAPILLO CALDERA / INCAPILLO PUMICE	69.14	0.66	11
ANDEAN ARC / CENTRAL ANDEAN VOLCANIC ZONE / CHILE / INCAPILLO CALDERA / INCAPILLO PUMICE	69.29	0.66	11
ANDEAN ARC / CENTRAL ANDEAN VOLCANIC ZONE / CHILE / INCAPILLO CALDERA / INCAPILLO PUMICE	69.5	0.63	16
ANDEAN ARC / CENTRAL ANDEAN VOLCANIC ZONE / CHILE / INCAPILLO CALDERA / RIO SALADO DOME	68.31	1.03	9
ANDEAN ARC / CENTRAL ANDEAN VOLCANIC ZONE / CHILE / INCAPILLO CALDERA / SOUTHERN INCAPILLO DOME	63	2.21	14
ANDEAN ARC / CENTRAL ANDEAN VOLCANIC ZONE / CHILE / INCAPILLO CALDERA / SOUTHERN INCAPILLO DOME	65.5	1.51	15
ANDEAN ARC / CENTRAL ANDEAN VOLCANIC ZONE / CHILE / INCAPILLO CALDERA / SOUTHERN INCAPILLO DOME	63.5	2.17	28
ANDEAN ARC / CENTRAL ANDEAN VOLCANIC ZONE / CHILE / IRRUPUTUNCU	62.6	2.54	5.40643
ANDEAN ARC / CENTRAL ANDEAN VOLCANIC ZONE / CHILE / IRRUPUTUNCU	63.92	1.93	17
ANDEAN ARC / CENTRAL ANDEAN VOLCANIC ZONE / CHILE / IRRUPUTUNCU	62.5	2.28	17.7335
ANDEAN ARC / CENTRAL ANDEAN VOLCANIC ZONE / CHILE / IRRUPUTUNCU	61.7	2.24	23
ANDEAN ARC / CENTRAL ANDEAN VOLCANIC ZONE / CHILE / IRRUPUTUNCU	60.6	2.77	24
ANDEAN ARC / CENTRAL ANDEAN VOLCANIC ZONE / CHILE / IRRUPUTUNCU	62.4	2.86	27.7
ANDEAN ARC / CENTRAL ANDEAN VOLCANIC ZONE / CHILE / IRRUPUTUNCU	62.52	2.75	32
ANDEAN ARC / CENTRAL ANDEAN VOLCANIC ZONE / CHILE / IRRUPUTUNCU	60.63	2.45	36
ANDEAN ARC / CENTRAL ANDEAN VOLCANIC ZONE / CHILE / IRRUPUTUNCU	59.55	2.68	39
ANDEAN ARC / CENTRAL ANDEAN VOLCANIC ZONE / CHILE / IRRUPUTUNCU	59.74	2.47	40
ANDEAN ARC / CENTRAL ANDEAN VOLCANIC ZONE / CHILE / IRRUPUTUNCU	62.38	2.76	42
ANDEAN ARC / CENTRAL ANDEAN VOLCANIC ZONE / CHILE / IRRUPUTUNCU	60.9	2.9	45
ANDEAN ARC / CENTRAL ANDEAN VOLCANIC ZONE / CHILE / ISLUGA	60.45	2.31	9
ANDEAN ARC / CENTRAL ANDEAN VOLCANIC ZONE / CHILE / ISLUGA	60.36	2.42	11
ANDEAN ARC / CENTRAL ANDEAN VOLCANIC ZONE / CHILE / ISLUGA	60.06	2.38	11
ANDEAN ARC / CENTRAL ANDEAN VOLCANIC ZONE / CHILE / ISLUGA	60.55	2.37	13
ANDEAN ARC / CENTRAL ANDEAN VOLCANIC ZONE / CHILE / ISLUGA	60.86	1.99	14
ANDEAN ARC / CENTRAL ANDEAN VOLCANIC ZONE / CHILE / ISLUGA	60.45	2.7	17
ANDEAN ARC / CENTRAL ANDEAN VOLCANIC ZONE / CHILE / ISLUGA	62.64	2.15	18
ANDEAN ARC / CENTRAL ANDEAN VOLCANIC ZONE / CHILE / ISLUGA	60.55	2.35	19
ANDEAN ARC / CENTRAL ANDEAN VOLCANIC ZONE / CHILE / ISLUGA	59.16	2.97	22
ANDEAN ARC / CENTRAL ANDEAN VOLCANIC ZONE / CHILE / ISLUGA	60.96	2.78	26
ANDEAN ARC / CENTRAL ANDEAN VOLCANIC ZONE / CHILE / ISLUGA	58.36	3.19	27.2756
ANDEAN ARC / CENTRAL ANDEAN VOLCANIC ZONE / CHILE / ISLUGA	64.53	1.99	30
ANDEAN ARC / CENTRAL ANDEAN VOLCANIC ZONE / CHILE / ISLUGA	60.75	2.37	32
ANDEAN ARC / CENTRAL ANDEAN VOLCANIC ZONE / CHILE / ISLUGA	64.63	1.96	35
ANDEAN ARC / CENTRAL ANDEAN VOLCANIC ZONE / CHILE / ISLUGA	62.24	2.23	52
ANDEAN ARC / CENTRAL ANDEAN VOLCANIC ZONE / CHILE / ISLUGA	60.75	2.06	87
ANDEAN ARC / CENTRAL ANDEAN VOLCANIC ZONE / CHILE / JURIQUES	55.45	3.1	14
ANDEAN ARC / CENTRAL ANDEAN VOLCANIC ZONE / CHILE / JURIQUES	53.16	4.95	17
ANDEAN ARC / CENTRAL ANDEAN VOLCANIC ZONE / CHILE / LACO	63.13	0.58	20
ANDEAN ARC / CENTRAL ANDEAN VOLCANIC ZONE / CHILE / LACO	57.9	3.77	27
ANDEAN ARC / CENTRAL ANDEAN VOLCANIC ZONE / CHILE / LACO	61.17	1.64	67
ANDEAN ARC / CENTRAL ANDEAN VOLCANIC ZONE / CHILE / LAGUNA VERDE	73.95	0.12	0
ANDEAN ARC / CENTRAL ANDEAN VOLCANIC ZONE / CHILE / LAGUNA VERDE	69.1	0.89	7
ANDEAN ARC / CENTRAL ANDEAN VOLCANIC ZONE / CHILE / LAGUNA VERDE	78.1	0.18	7
ANDEAN ARC / CENTRAL ANDEAN VOLCANIC ZONE / CHILE / LAGUNA VERDE	64.9	1.37	11
ANDEAN ARC / CENTRAL ANDEAN VOLCANIC ZONE / CHILE / LAGUNA VERDE	73.8	0.22	11
ANDEAN ARC / CENTRAL ANDEAN VOLCANIC ZONE / CHILE / LAGUNA VERDE	63.7	1.26	12
ANDEAN ARC / CENTRAL ANDEAN VOLCANIC ZONE / CHILE / LAGUNA VERDE	58.37	2.62	19
ANDEAN ARC / CENTRAL ANDEAN VOLCANIC ZONE / CHILE / LAGUNA VERDE	75.3	0.13	31
ANDEAN ARC / CENTRAL ANDEAN VOLCANIC ZONE / CHILE / LASCAR	60.6	2.44	2.26359
ANDEAN ARC / CENTRAL ANDEAN VOLCANIC ZONE / CHILE / LASCAR	55.86	4.92	3
ANDEAN ARC / CENTRAL ANDEAN VOLCANIC ZONE / CHILE / LASCAR	61	2.3	12
ANDEAN ARC / CENTRAL ANDEAN VOLCANIC ZONE / CHILE / LASCAR	61.55	2.11	15
ANDEAN ARC / CENTRAL ANDEAN VOLCANIC ZONE / CHILE / LASCAR	60.63	2.44	15
ANDEAN ARC / CENTRAL ANDEAN VOLCANIC ZONE / CHILE / LASCAR	60.77	2.44	17
ANDEAN ARC / CENTRAL ANDEAN VOLCANIC ZONE / CHILE / LASCAR	64.93	2.03	18
ANDEAN ARC / CENTRAL ANDEAN VOLCANIC ZONE / CHILE / LASCAR	60.28	3.56	21
ANDEAN ARC / CENTRAL ANDEAN VOLCANIC ZONE / CHILE / LASCAR	60.47	2.55	22
ANDEAN ARC / CENTRAL ANDEAN VOLCANIC ZONE / CHILE / LASCAR	57.5	3.64	25.5
ANDEAN ARC / CENTRAL ANDEAN VOLCANIC ZONE / CHILE / LASCAR	56.87	4.27	27
ANDEAN ARC / CENTRAL ANDEAN VOLCANIC ZONE / CHILE / LASCAR	57.39	4.72	27.2165
ANDEAN ARC / CENTRAL ANDEAN VOLCANIC ZONE / CHILE / LASCAR	57.39	3.67	30
ANDEAN ARC / CENTRAL ANDEAN VOLCANIC ZONE / CHILE / LASCAR	58.7	4.42	32
ANDEAN ARC / CENTRAL ANDEAN VOLCANIC ZONE / CHILE / LASCAR	59.35	3.83	33
ANDEAN ARC / CENTRAL ANDEAN VOLCANIC ZONE / CHILE / LASCAR	60.4	2.5	34.1121
ANDEAN ARC / CENTRAL ANDEAN VOLCANIC ZONE / CHILE / LASCAR	58.46	4.7	36
ANDEAN ARC / CENTRAL ANDEAN VOLCANIC ZONE / CHILE / LASCAR	59.5	3.77	36
ANDEAN ARC / CENTRAL ANDEAN VOLCANIC ZONE / CHILE / LASCAR	59.71	3.5	37
ANDEAN ARC / CENTRAL ANDEAN VOLCANIC ZONE / CHILE / LASCAR	58	3.81	39
ANDEAN ARC / CENTRAL ANDEAN VOLCANIC ZONE / CHILE / LASCAR	60.56	3.86	43.6
ANDEAN ARC / CENTRAL ANDEAN VOLCANIC ZONE / CHILE / LASCAR	57.32	3.76	44
ANDEAN ARC / CENTRAL ANDEAN VOLCANIC ZONE / CHILE / LASCAR	57.83	4.27	45
ANDEAN ARC / CENTRAL ANDEAN VOLCANIC ZONE / CHILE / LASCAR	58.63	4.92	54.2
ANDEAN ARC / CENTRAL ANDEAN VOLCANIC ZONE / CHILE / LASCAR	58.3	4.78	58
ANDEAN ARC / CENTRAL ANDEAN VOLCANIC ZONE / CHILE / LASCAR	58.86	3.34	61
ANDEAN ARC / CENTRAL ANDEAN VOLCANIC ZONE / CHILE / LASCAR	60.97	2.49	110
ANDEAN ARC / CENTRAL ANDEAN VOLCANIC ZONE / CHILE / LASCAR	58.41	4.79	121
ANDEAN ARC / CENTRAL ANDEAN VOLCANIC ZONE / CHILE / LASCAR	56.86	3.96	126
ANDEAN ARC / CENTRAL ANDEAN VOLCANIC ZONE / CHILE / LASCAR	59.22	3.52	135
ANDEAN ARC / CENTRAL ANDEAN VOLCANIC ZONE / CHILE / LASCAR	58.43	4.65	147
ANDEAN ARC / CENTRAL ANDEAN VOLCANIC ZONE / CHILE / LASCAR	61.5	2.84	169
ANDEAN ARC / CENTRAL ANDEAN VOLCANIC ZONE / CHILE / LASCAR	61.65	2.95	169
ANDEAN ARC / CENTRAL ANDEAN VOLCANIC ZONE / CHILE / LASCAR / BARROSO FORMATION	63.16	1.89	20
ANDEAN ARC / CENTRAL ANDEAN VOLCANIC ZONE / CHILE / LASCAR / BARROSO FORMATION	65.78	1.58	28
ANDEAN ARC / CENTRAL ANDEAN VOLCANIC ZONE / CHILE / LASCAR / CAPRICORN LAVA	63.41	2.79	36
ANDEAN ARC / CENTRAL ANDEAN VOLCANIC ZONE / CHILE / LASCAR / CAPRICORN LAVA	55.52	5.49	37
ANDEAN ARC / CENTRAL ANDEAN VOLCANIC ZONE / CHILE / LASCAR / CAPRICORN LAVA	57.17	4.77	60
ANDEAN ARC / CENTRAL ANDEAN VOLCANIC ZONE / CHILE / LASCAR / PIEDRAS GRANDES	63.88	2.38	23
ANDEAN ARC / CENTRAL ANDEAN VOLCANIC ZONE / CHILE / LASCAR / PIEDRAS GRANDES	63.21	2.92	25
ANDEAN ARC / CENTRAL ANDEAN VOLCANIC ZONE / CHILE / LASCAR / PIEDRAS GRANDES	61.58	2.9	30
ANDEAN ARC / CENTRAL ANDEAN VOLCANIC ZONE / CHILE / LASCAR / PIEDRAS GRANDES	61.44	2.96	34
ANDEAN ARC / CENTRAL ANDEAN VOLCANIC ZONE / CHILE / LASCAR / PIEDRAS GRANDES	60.07	3.32	41
ANDEAN ARC / CENTRAL ANDEAN VOLCANIC ZONE / CHILE / LASCAR / PIEDRAS GRANDES	57.58	5.56	41
ANDEAN ARC / CENTRAL ANDEAN VOLCANIC ZONE / CHILE / LASCAR / PIEDRAS GRANDES	60.87	3.1	50
ANDEAN ARC / CENTRAL ANDEAN VOLCANIC ZONE / CHILE / LASCAR / SONCOR FORMATION	64.23	2.59	10
ANDEAN ARC / CENTRAL ANDEAN VOLCANIC ZONE / CHILE / LASCAR / SONCOR FORMATION	56.13	5.71	10
ANDEAN ARC / CENTRAL ANDEAN VOLCANIC ZONE / CHILE / LASCAR / SONCOR FORMATION	67.04	2.03	11
ANDEAN ARC / CENTRAL ANDEAN VOLCANIC ZONE / CHILE / LASCAR / SONCOR FORMATION	65.46	2.62	12
ANDEAN ARC / CENTRAL ANDEAN VOLCANIC ZONE / CHILE / LASCAR / SONCOR FORMATION	67.18	2.1	15
ANDEAN ARC / CENTRAL ANDEAN VOLCANIC ZONE / CHILE / LASCAR / SONCOR FORMATION	65.54	2.51	16
ANDEAN ARC / CENTRAL ANDEAN VOLCANIC ZONE / CHILE / LASCAR / SONCOR FORMATION	65.14	2.54	16
ANDEAN ARC / CENTRAL ANDEAN VOLCANIC ZONE / CHILE / LASCAR / SONCOR FORMATION	64.9	1.81	16
ANDEAN ARC / CENTRAL ANDEAN VOLCANIC ZONE / CHILE / LASCAR / SONCOR FORMATION	62.36	3.1	17
ANDEAN ARC / CENTRAL ANDEAN VOLCANIC ZONE / CHILE / LASCAR / SONCOR FORMATION	64.94	2.39	19
ANDEAN ARC / CENTRAL ANDEAN VOLCANIC ZONE / CHILE / LASCAR / SONCOR FORMATION	56.19	5.81	19
ANDEAN ARC / CENTRAL ANDEAN VOLCANIC ZONE / CHILE / LASCAR / SONCOR FORMATION	63.72	2.79	22
ANDEAN ARC / CENTRAL ANDEAN VOLCANIC ZONE / CHILE / LASCAR / SONCOR FORMATION	62.39	2.72	22
ANDEAN ARC / CENTRAL ANDEAN VOLCANIC ZONE / CHILE / LASCAR / SONCOR FORMATION	67.66	2.39	22
ANDEAN ARC / CENTRAL ANDEAN VOLCANIC ZONE / CHILE / LASCAR / SONCOR FORMATION	65.57	2.44	24
ANDEAN ARC / CENTRAL ANDEAN VOLCANIC ZONE / CHILE / LASCAR / SONCOR FORMATION	63.99	2.57	25
ANDEAN ARC / CENTRAL ANDEAN VOLCANIC ZONE / CHILE / LASCAR / SONCOR FORMATION	62.47	3.11	26
ANDEAN ARC / CENTRAL ANDEAN VOLCANIC ZONE / CHILE / LASCAR / SONCOR FORMATION	67.64	1.85	26
ANDEAN ARC / CENTRAL ANDEAN VOLCANIC ZONE / CHILE / LASCAR / SONCOR FORMATION	62.01	3.21	26
ANDEAN ARC / CENTRAL ANDEAN VOLCANIC ZONE / CHILE / LASCAR / SONCOR FORMATION	59.86	3.98	26
ANDEAN ARC / CENTRAL ANDEAN VOLCANIC ZONE / CHILE / LASCAR / SONCOR FORMATION	67.31	1.96	27
ANDEAN ARC / CENTRAL ANDEAN VOLCANIC ZONE / CHILE / LASCAR / SONCOR FORMATION	58.86	4	27
ANDEAN ARC / CENTRAL ANDEAN VOLCANIC ZONE / CHILE / LASCAR / SONCOR FORMATION	64.01	2.59	28
ANDEAN ARC / CENTRAL ANDEAN VOLCANIC ZONE / CHILE / LASCAR / SONCOR FORMATION	64.98	2.53	28
ANDEAN ARC / CENTRAL ANDEAN VOLCANIC ZONE / CHILE / LASCAR / SONCOR FORMATION	66.58	2.23	28
ANDEAN ARC / CENTRAL ANDEAN VOLCANIC ZONE / CHILE / LASCAR / SONCOR FORMATION	65.02	2.12	28
ANDEAN ARC / CENTRAL ANDEAN VOLCANIC ZONE / CHILE / LASCAR / SONCOR FORMATION	56.67	5.17	28
ANDEAN ARC / CENTRAL ANDEAN VOLCANIC ZONE / CHILE / LASCAR / SONCOR FORMATION	64.05	2.74	30
ANDEAN ARC / CENTRAL ANDEAN VOLCANIC ZONE / CHILE / LASCAR / SONCOR FORMATION	59.17	4.21	30
ANDEAN ARC / CENTRAL ANDEAN VOLCANIC ZONE / CHILE / LASCAR / SONCOR FORMATION	63.88	2.59	33
ANDEAN ARC / CENTRAL ANDEAN VOLCANIC ZONE / CHILE / LASCAR / SONCOR FORMATION	63.84	2.72	33
ANDEAN ARC / CENTRAL ANDEAN VOLCANIC ZONE / CHILE / LASCAR / SONCOR FORMATION	63.37	2.85	34
ANDEAN ARC / CENTRAL ANDEAN VOLCANIC ZONE / CHILE / LASCAR / SONCOR FORMATION	63.02	2.8	36
ANDEAN ARC / CENTRAL ANDEAN VOLCANIC ZONE / CHILE / LASCAR / SONCOR FORMATION	62.45	2.99	37
ANDEAN ARC / CENTRAL ANDEAN VOLCANIC ZONE / CHILE / LASCAR / SONCOR FORMATION	63.51	2.73	37
ANDEAN ARC / CENTRAL ANDEAN VOLCANIC ZONE / CHILE / LASCAR / SONCOR FORMATION	66.56	2.05	40
ANDEAN ARC / CENTRAL ANDEAN VOLCANIC ZONE / CHILE / LASCAR / SONCOR FORMATION	59.17	4.11	40
ANDEAN ARC / CENTRAL ANDEAN VOLCANIC ZONE / CHILE / LASCAR / SONCOR FORMATION	58.05	4.49	41
ANDEAN ARC / CENTRAL ANDEAN VOLCANIC ZONE / CHILE / LASCAR / SONCOR FORMATION	59.08	4.15	41
ANDEAN ARC / CENTRAL ANDEAN VOLCANIC ZONE / CHILE / LASCAR / SONCOR FORMATION	61.79	3.35	42
ANDEAN ARC / CENTRAL ANDEAN VOLCANIC ZONE / CHILE / LASCAR / SONCOR FORMATION	61.31	3.26	42
ANDEAN ARC / CENTRAL ANDEAN VOLCANIC ZONE / CHILE / LASCAR / SONCOR FORMATION	61.14	3.25	42
ANDEAN ARC / CENTRAL ANDEAN VOLCANIC ZONE / CHILE / LASCAR / SONCOR FORMATION	63.41	2.72	42
ANDEAN ARC / CENTRAL ANDEAN VOLCANIC ZONE / CHILE / LASCAR / SONCOR FORMATION	59.16	4.16	44
ANDEAN ARC / CENTRAL ANDEAN VOLCANIC ZONE / CHILE / LASCAR / SONCOR FORMATION	59.51	3.52	44
ANDEAN ARC / CENTRAL ANDEAN VOLCANIC ZONE / CHILE / LASCAR / SONCOR FORMATION	60.6	3.44	48
ANDEAN ARC / CENTRAL ANDEAN VOLCANIC ZONE / CHILE / LASCAR / SONCOR FORMATION	62.46	2.87	50
ANDEAN ARC / CENTRAL ANDEAN VOLCANIC ZONE / CHILE / LASCAR / SONCOR FORMATION	59.02	4.26	50
ANDEAN ARC / CENTRAL ANDEAN VOLCANIC ZONE / CHILE / LASCAR / SONCOR FORMATION	61.02	3.44	51
ANDEAN ARC / CENTRAL ANDEAN VOLCANIC ZONE / CHILE / LASCAR / SONCOR FORMATION	58.34	4.23	58
ANDEAN ARC / CENTRAL ANDEAN VOLCANIC ZONE / CHILE / LASCAR / SONCOR FORMATION	56.81	5.31	60
ANDEAN ARC / CENTRAL ANDEAN VOLCANIC ZONE / CHILE / LASTARRIA	60.1	4.33	43.1053
ANDEAN ARC / CENTRAL ANDEAN VOLCANIC ZONE / CHILE / LASTARRIA	59.5	3.6	43.6263
ANDEAN ARC / CENTRAL ANDEAN VOLCANIC ZONE / CHILE / LASTARRIA	62.8	2.26	46
ANDEAN ARC / CENTRAL ANDEAN VOLCANIC ZONE / CHILE / LASTARRIA	58.7	4.21	69.6462
ANDEAN ARC / CENTRAL ANDEAN VOLCANIC ZONE / CHILE / LASTARRIA VOLCANIC COMPLEX	60.98	2.75	23
ANDEAN ARC / CENTRAL ANDEAN VOLCANIC ZONE / CHILE / LASTARRIA VOLCANIC COMPLEX	60.77	2.68	25
ANDEAN ARC / CENTRAL ANDEAN VOLCANIC ZONE / CHILE / LASTARRIA VOLCANIC COMPLEX	60.74	2.7	27
ANDEAN ARC / CENTRAL ANDEAN VOLCANIC ZONE / CHILE / LASTARRIA VOLCANIC COMPLEX	60.54	3.46	31
ANDEAN ARC / CENTRAL ANDEAN VOLCANIC ZONE / CHILE / LASTARRIA VOLCANIC COMPLEX	62.55	2.84	32
ANDEAN ARC / CENTRAL ANDEAN VOLCANIC ZONE / CHILE / LASTARRIA VOLCANIC COMPLEX	60.99	2.78	32
ANDEAN ARC / CENTRAL ANDEAN VOLCANIC ZONE / CHILE / LASTARRIA VOLCANIC COMPLEX	59.57	3.59	33
ANDEAN ARC / CENTRAL ANDEAN VOLCANIC ZONE / CHILE / LASTARRIA VOLCANIC COMPLEX	61.46	3.4	34
ANDEAN ARC / CENTRAL ANDEAN VOLCANIC ZONE / CHILE / LASTARRIA VOLCANIC COMPLEX	60.91	3.59	36
ANDEAN ARC / CENTRAL ANDEAN VOLCANIC ZONE / CHILE / LASTARRIA VOLCANIC COMPLEX	60.91	3.59	36
ANDEAN ARC / CENTRAL ANDEAN VOLCANIC ZONE / CHILE / LASTARRIA VOLCANIC COMPLEX	60.52	3.1	37
ANDEAN ARC / CENTRAL ANDEAN VOLCANIC ZONE / CHILE / LASTARRIA VOLCANIC COMPLEX	59.54	3.71	38
ANDEAN ARC / CENTRAL ANDEAN VOLCANIC ZONE / CHILE / LASTARRIA VOLCANIC COMPLEX	59.51	4.02	39
ANDEAN ARC / CENTRAL ANDEAN VOLCANIC ZONE / CHILE / LASTARRIA VOLCANIC COMPLEX	60.61	3.26	40
ANDEAN ARC / CENTRAL ANDEAN VOLCANIC ZONE / CHILE / LASTARRIA VOLCANIC COMPLEX	62.46	2.46	41
ANDEAN ARC / CENTRAL ANDEAN VOLCANIC ZONE / CHILE / LASTARRIA VOLCANIC COMPLEX	59.34	4.04	45
ANDEAN ARC / CENTRAL ANDEAN VOLCANIC ZONE / CHILE / LASTARRIA VOLCANIC COMPLEX	59.39	3.84	46
ANDEAN ARC / CENTRAL ANDEAN VOLCANIC ZONE / CHILE / LASTARRIA VOLCANIC COMPLEX	60.72	3.85	54
ANDEAN ARC / CENTRAL ANDEAN VOLCANIC ZONE / CHILE / LAUCA	74.37	0.65	2
ANDEAN ARC / CENTRAL ANDEAN VOLCANIC ZONE / CHILE / LAUCA	73.78	0.27	2
ANDEAN ARC / CENTRAL ANDEAN VOLCANIC ZONE / CHILE / LAUCA	75.07	0.29	6
ANDEAN ARC / CENTRAL ANDEAN VOLCANIC ZONE / CHILE / LAUCA	73.2	0.16	6
ANDEAN ARC / CENTRAL ANDEAN VOLCANIC ZONE / CHILE / LAUCA	64.93	1.17	9
ANDEAN ARC / CENTRAL ANDEAN VOLCANIC ZONE / CHILE / LAUCA	61.45	2.1	30
ANDEAN ARC / CENTRAL ANDEAN VOLCANIC ZONE / CHILE / LAUCA	66.82	1.55	38
ANDEAN ARC / CENTRAL ANDEAN VOLCANIC ZONE / CHILE / LAUCA	66.22	1.51	39
ANDEAN ARC / CENTRAL ANDEAN VOLCANIC ZONE / CHILE / LAUCA	58.66	2.84	42
ANDEAN ARC / CENTRAL ANDEAN VOLCANIC ZONE / CHILE / LICANCABUR	58.99	1.74	20
ANDEAN ARC / CENTRAL ANDEAN VOLCANIC ZONE / CHILE / LICANCABUR	60.9	2.51	36.9
ANDEAN ARC / CENTRAL ANDEAN VOLCANIC ZONE / CHILE / LICANCABUR	60.8	2.66	49.1
ANDEAN ARC / CENTRAL ANDEAN VOLCANIC ZONE / CHILE / LICANCABUR	60.4	2.77	75.1
ANDEAN ARC / CENTRAL ANDEAN VOLCANIC ZONE / CHILE / MINO	57.26	3.78	3.12853
ANDEAN ARC / CENTRAL ANDEAN VOLCANIC ZONE / CHILE / MINO	61.78	2.78	44
ANDEAN ARC / CENTRAL ANDEAN VOLCANIC ZONE / CHILE / MINO	58.96	3.47	48
ANDEAN ARC / CENTRAL ANDEAN VOLCANIC ZONE / CHILE / MINO	59.77	3.22	60
ANDEAN ARC / CENTRAL ANDEAN VOLCANIC ZONE / CHILE / MISCANTI	62.3	2.77	33
ANDEAN ARC / CENTRAL ANDEAN VOLCANIC ZONE / CHILE / MISCANTI	64.35	2.06	38
ANDEAN ARC / CENTRAL ANDEAN VOLCANIC ZONE / CHILE / MISCANTI	59.52	3.6	40
ANDEAN ARC / CENTRAL ANDEAN VOLCANIC ZONE / CHILE / MULAS MUERTAS	57.99	2.36	15
ANDEAN ARC / CENTRAL ANDEAN VOLCANIC ZONE / CHILE / MULAS MUERTAS	60.56	3.95	38
ANDEAN ARC / CENTRAL ANDEAN VOLCANIC ZONE / CHILE / OJOS DE SALADO	63.4	1.91	9.46725
ANDEAN ARC / CENTRAL ANDEAN VOLCANIC ZONE / CHILE / OJOS DE SALADO	62.7	2.1	20
ANDEAN ARC / CENTRAL ANDEAN VOLCANIC ZONE / CHILE / OJOS DE SALADO	56.21	5.35	37
ANDEAN ARC / CENTRAL ANDEAN VOLCANIC ZONE / CHILE / OLCA	60.61	2.39	31
ANDEAN ARC / CENTRAL ANDEAN VOLCANIC ZONE / CHILE / OLCA	61.39	2.25	31
ANDEAN ARC / CENTRAL ANDEAN VOLCANIC ZONE / CHILE / OLCA	62.27	2.44	42
ANDEAN ARC / CENTRAL ANDEAN VOLCANIC ZONE / CHILE / OLCA	60.92	2.59	47
ANDEAN ARC / CENTRAL ANDEAN VOLCANIC ZONE / CHILE / OLCA	63.46	1.98	48
ANDEAN ARC / CENTRAL ANDEAN VOLCANIC ZONE / CHILE / OLCA	59.1	3.73	51
ANDEAN ARC / CENTRAL ANDEAN VOLCANIC ZONE / CHILE / OLLAGUE	66.19	1.2	4.66531
ANDEAN ARC / CENTRAL ANDEAN VOLCANIC ZONE / CHILE / OLLAGUE	62.15	2.37	5.83211
ANDEAN ARC / CENTRAL ANDEAN VOLCANIC ZONE / CHILE / OLLAGUE	63.79	2.09	6.1423
ANDEAN ARC / CENTRAL ANDEAN VOLCANIC ZONE / CHILE / OLLAGUE	65.57	1.53	10
ANDEAN ARC / CENTRAL ANDEAN VOLCANIC ZONE / CHILE / OLLAGUE	63.46	2.1	11
ANDEAN ARC / CENTRAL ANDEAN VOLCANIC ZONE / CHILE / OLLAGUE	61.57	2.19	13
ANDEAN ARC / CENTRAL ANDEAN VOLCANIC ZONE / CHILE / OLLAGUE	53.1	5.2	13
ANDEAN ARC / CENTRAL ANDEAN VOLCANIC ZONE / CHILE / OLLAGUE	61.65	2.81	13
ANDEAN ARC / CENTRAL ANDEAN VOLCANIC ZONE / CHILE / OLLAGUE	60.41	3.57	13
ANDEAN ARC / CENTRAL ANDEAN VOLCANIC ZONE / CHILE / OLLAGUE	62.08	2.66	13
ANDEAN ARC / CENTRAL ANDEAN VOLCANIC ZONE / CHILE / OLLAGUE	62.7	2.64	14
ANDEAN ARC / CENTRAL ANDEAN VOLCANIC ZONE / CHILE / OLLAGUE	62.12	2.37	16
ANDEAN ARC / CENTRAL ANDEAN VOLCANIC ZONE / CHILE / OLLAGUE	63.23	2.17	16
ANDEAN ARC / CENTRAL ANDEAN VOLCANIC ZONE / CHILE / OLLAGUE	63.37	2.09	17
ANDEAN ARC / CENTRAL ANDEAN VOLCANIC ZONE / CHILE / OLLAGUE	62.41	2.17	18
ANDEAN ARC / CENTRAL ANDEAN VOLCANIC ZONE / CHILE / OLLAGUE	56.4	3.9	20
ANDEAN ARC / CENTRAL ANDEAN VOLCANIC ZONE / CHILE / OLLAGUE	58.08	4.28	84.3
ANDEAN ARC / CENTRAL ANDEAN VOLCANIC ZONE / CHILE / OLLAGUE / LA CELOSA SERIES	64.7	1.8	9
ANDEAN ARC / CENTRAL ANDEAN VOLCANIC ZONE / CHILE / OLLAGUE / LA CELOSA SERIES	66.4	1.2	9
ANDEAN ARC / CENTRAL ANDEAN VOLCANIC ZONE / CHILE / PALPANA	58.07	2.99	2.44346
ANDEAN ARC / CENTRAL ANDEAN VOLCANIC ZONE / CHILE / PALPANA	57.06	2.61	3.09355
ANDEAN ARC / CENTRAL ANDEAN VOLCANIC ZONE / CHILE / PALPANA	59.27	2.14	5.11675
ANDEAN ARC / CENTRAL ANDEAN VOLCANIC ZONE / CHILE / PALPANA	61.57	2.23	57
ANDEAN ARC / CENTRAL ANDEAN VOLCANIC ZONE / CHILE / PALPANA	57.21	3.82	64
ANDEAN ARC / CENTRAL ANDEAN VOLCANIC ZONE / CHILE / PALPANA	58.79	3.24	70
ANDEAN ARC / CENTRAL ANDEAN VOLCANIC ZONE / CHILE / PANIRI	56.64	3.03	29
ANDEAN ARC / CENTRAL ANDEAN VOLCANIC ZONE / CHILE / PANIRI	56.94	3.03	29
ANDEAN ARC / CENTRAL ANDEAN VOLCANIC ZONE / CHILE / PANIRI	57.96	3.01	31
ANDEAN ARC / CENTRAL ANDEAN VOLCANIC ZONE / CHILE / PANIRI	56.04	4.09	42
ANDEAN ARC / CENTRAL ANDEAN VOLCANIC ZONE / CHILE / PANIRI	56.14	3.5	47
ANDEAN ARC / CENTRAL ANDEAN VOLCANIC ZONE / CHILE / PARINACOTA	74.77	0.48	1
ANDEAN ARC / CENTRAL ANDEAN VOLCANIC ZONE / CHILE / PARINACOTA	67.02	1.23	1
ANDEAN ARC / CENTRAL ANDEAN VOLCANIC ZONE / CHILE / PARINACOTA	59.17	3.3	1.13089
ANDEAN ARC / CENTRAL ANDEAN VOLCANIC ZONE / CHILE / PARINACOTA	58	2.42	1.2
ANDEAN ARC / CENTRAL ANDEAN VOLCANIC ZONE / CHILE / PARINACOTA	66.1	1.93	1.3
ANDEAN ARC / CENTRAL ANDEAN VOLCANIC ZONE / CHILE / PARINACOTA	58.6	3.59	1.5941
ANDEAN ARC / CENTRAL ANDEAN VOLCANIC ZONE / CHILE / PARINACOTA	63.18	1.93	1.67835
ANDEAN ARC / CENTRAL ANDEAN VOLCANIC ZONE / CHILE / PARINACOTA	62.6	2.01	2
ANDEAN ARC / CENTRAL ANDEAN VOLCANIC ZONE / CHILE / PARINACOTA	57.7	3.02	2
ANDEAN ARC / CENTRAL ANDEAN VOLCANIC ZONE / CHILE / PARINACOTA	58.61	3.19	2.2473
ANDEAN ARC / CENTRAL ANDEAN VOLCANIC ZONE / CHILE / PARINACOTA	59.35	3.4	2.31076
ANDEAN ARC / CENTRAL ANDEAN VOLCANIC ZONE / CHILE / PARINACOTA	59.28	3.16	2.34806
ANDEAN ARC / CENTRAL ANDEAN VOLCANIC ZONE / CHILE / PARINACOTA	59	3.18	2.36029
ANDEAN ARC / CENTRAL ANDEAN VOLCANIC ZONE / CHILE / PARINACOTA	66.8	0.69	2.4
ANDEAN ARC / CENTRAL ANDEAN VOLCANIC ZONE / CHILE / PARINACOTA	59.15	3.15	2.68833
ANDEAN ARC / CENTRAL ANDEAN VOLCANIC ZONE / CHILE / PARINACOTA	58.83	3.21	2.68893
ANDEAN ARC / CENTRAL ANDEAN VOLCANIC ZONE / CHILE / PARINACOTA	59.21	3.19	2.80926
ANDEAN ARC / CENTRAL ANDEAN VOLCANIC ZONE / CHILE / PARINACOTA	70.82	0.63	2.85
ANDEAN ARC / CENTRAL ANDEAN VOLCANIC ZONE / CHILE / PARINACOTA	66.02	1.29	2.86
ANDEAN ARC / CENTRAL ANDEAN VOLCANIC ZONE / CHILE / PARINACOTA	61.83	2.13	2.97
ANDEAN ARC / CENTRAL ANDEAN VOLCANIC ZONE / CHILE / PARINACOTA	68.22	1.09	3.03158
ANDEAN ARC / CENTRAL ANDEAN VOLCANIC ZONE / CHILE / PARINACOTA	71.69	0.58	3.47
ANDEAN ARC / CENTRAL ANDEAN VOLCANIC ZONE / CHILE / PARINACOTA	62.1	2.47	3.6
ANDEAN ARC / CENTRAL ANDEAN VOLCANIC ZONE / CHILE / PARINACOTA	56.28	4.2	3.63
ANDEAN ARC / CENTRAL ANDEAN VOLCANIC ZONE / CHILE / PARINACOTA	60.9	2.31	3.8
ANDEAN ARC / CENTRAL ANDEAN VOLCANIC ZONE / CHILE / PARINACOTA	58.06	3.47	3.86129
ANDEAN ARC / CENTRAL ANDEAN VOLCANIC ZONE / CHILE / PARINACOTA	58.38	3.23	3.89713
ANDEAN ARC / CENTRAL ANDEAN VOLCANIC ZONE / CHILE / PARINACOTA	58.36	3.22	4.08437
ANDEAN ARC / CENTRAL ANDEAN VOLCANIC ZONE / CHILE / PARINACOTA	59.16	3.17	4.4
ANDEAN ARC / CENTRAL ANDEAN VOLCANIC ZONE / CHILE / PARINACOTA	59.11	3.38	4.44478
ANDEAN ARC / CENTRAL ANDEAN VOLCANIC ZONE / CHILE / PARINACOTA	59.96	2.89	4.49086
ANDEAN ARC / CENTRAL ANDEAN VOLCANIC ZONE / CHILE / PARINACOTA	61.8	2.12	4.5
ANDEAN ARC / CENTRAL ANDEAN VOLCANIC ZONE / CHILE / PARINACOTA	61.05	2.66	4.52148
ANDEAN ARC / CENTRAL ANDEAN VOLCANIC ZONE / CHILE / PARINACOTA	56.39	4.32	4.53403
ANDEAN ARC / CENTRAL ANDEAN VOLCANIC ZONE / CHILE / PARINACOTA	68.51	1.07	4.78882
ANDEAN ARC / CENTRAL ANDEAN VOLCANIC ZONE / CHILE / PARINACOTA	72.68	0.7	4.89375
ANDEAN ARC / CENTRAL ANDEAN VOLCANIC ZONE / CHILE / PARINACOTA	67.81	1.08	4.93328
ANDEAN ARC / CENTRAL ANDEAN VOLCANIC ZONE / CHILE / PARINACOTA	57.64	3.11	5.0541
ANDEAN ARC / CENTRAL ANDEAN VOLCANIC ZONE / CHILE / PARINACOTA	69.5	0.89	5.43396
ANDEAN ARC / CENTRAL ANDEAN VOLCANIC ZONE / CHILE / PARINACOTA	58.86	3.21	5.75277
ANDEAN ARC / CENTRAL ANDEAN VOLCANIC ZONE / CHILE / PARINACOTA	59.03	3.31	5.77
ANDEAN ARC / CENTRAL ANDEAN VOLCANIC ZONE / CHILE / PARINACOTA	59.11	2.88	5.91059
ANDEAN ARC / CENTRAL ANDEAN VOLCANIC ZONE / CHILE / PARINACOTA	58.85	3.19	6.13942
ANDEAN ARC / CENTRAL ANDEAN VOLCANIC ZONE / CHILE / PARINACOTA	63.34	2.44	6.2
ANDEAN ARC / CENTRAL ANDEAN VOLCANIC ZONE / CHILE / PARINACOTA	57.72	3.44	6.25334
ANDEAN ARC / CENTRAL ANDEAN VOLCANIC ZONE / CHILE / PARINACOTA	58.32	3.13	6.44249
ANDEAN ARC / CENTRAL ANDEAN VOLCANIC ZONE / CHILE / PARINACOTA	52.75	5.69	6.60237
ANDEAN ARC / CENTRAL ANDEAN VOLCANIC ZONE / CHILE / PARINACOTA	61.6	2.22	6.7
ANDEAN ARC / CENTRAL ANDEAN VOLCANIC ZONE / CHILE / PARINACOTA	67.3	1.05	7
ANDEAN ARC / CENTRAL ANDEAN VOLCANIC ZONE / CHILE / PARINACOTA			7
ANDEAN ARC / CENTRAL ANDEAN VOLCANIC ZONE / CHILE / PARINACOTA	68.96	0.99	7.05451
ANDEAN ARC / CENTRAL ANDEAN VOLCANIC ZONE / CHILE / PARINACOTA	59.15	3.25	7.36572
ANDEAN ARC / CENTRAL ANDEAN VOLCANIC ZONE / CHILE / PARINACOTA	56.5	4.05	7.56
ANDEAN ARC / CENTRAL ANDEAN VOLCANIC ZONE / CHILE / PARINACOTA	58.76	3.06	7.86969
ANDEAN ARC / CENTRAL ANDEAN VOLCANIC ZONE / CHILE / PARINACOTA	59.53	3.28	7.9819
ANDEAN ARC / CENTRAL ANDEAN VOLCANIC ZONE / CHILE / PARINACOTA	58.63	3.2	8.08755
ANDEAN ARC / CENTRAL ANDEAN VOLCANIC ZONE / CHILE / PARINACOTA	57.3	3.35	8.11191
ANDEAN ARC / CENTRAL ANDEAN VOLCANIC ZONE / CHILE / PARINACOTA	58.93	3.27	8.17477
ANDEAN ARC / CENTRAL ANDEAN VOLCANIC ZONE / CHILE / PARINACOTA	60.53	3.09	8.3647
ANDEAN ARC / CENTRAL ANDEAN VOLCANIC ZONE / CHILE / PARINACOTA	58.4	3.27	8.45762
ANDEAN ARC / CENTRAL ANDEAN VOLCANIC ZONE / CHILE / PARINACOTA	60.1	2.39	8.85
ANDEAN ARC / CENTRAL ANDEAN VOLCANIC ZONE / CHILE / PARINACOTA	68.5	0.87	9
ANDEAN ARC / CENTRAL ANDEAN VOLCANIC ZONE / CHILE / PARINACOTA	73.6	0.44	9
ANDEAN ARC / CENTRAL ANDEAN VOLCANIC ZONE / CHILE / PARINACOTA	67.51	1.1	9.88484
ANDEAN ARC / CENTRAL ANDEAN VOLCANIC ZONE / CHILE / PARINACOTA	60.75	2.82	10
ANDEAN ARC / CENTRAL ANDEAN VOLCANIC ZONE / CHILE / PARINACOTA	60.99	2.15	11.4772
ANDEAN ARC / CENTRAL ANDEAN VOLCANIC ZONE / CHILE / PARINACOTA	57.91	3.45	11.7219
ANDEAN ARC / CENTRAL ANDEAN VOLCANIC ZONE / CHILE / PARINACOTA	67.1	1.07	13
ANDEAN ARC / CENTRAL ANDEAN VOLCANIC ZONE / CHILE / PARINACOTA	52.87	5.98	13
ANDEAN ARC / CENTRAL ANDEAN VOLCANIC ZONE / CHILE / PARINACOTA	68.98	1.06	13
ANDEAN ARC / CENTRAL ANDEAN VOLCANIC ZONE / CHILE / PARINACOTA	60.03	2.94	13.7407
ANDEAN ARC / CENTRAL ANDEAN VOLCANIC ZONE / CHILE / PARINACOTA	71.47	0.49	14.3124
ANDEAN ARC / CENTRAL ANDEAN VOLCANIC ZONE / CHILE / PARINACOTA	52.99	4.89	14.6357
ANDEAN ARC / CENTRAL ANDEAN VOLCANIC ZONE / CHILE / PARINACOTA	67.3	1.01	15
ANDEAN ARC / CENTRAL ANDEAN VOLCANIC ZONE / CHILE / PARINACOTA	68.2	1.03	16
ANDEAN ARC / CENTRAL ANDEAN VOLCANIC ZONE / CHILE / PARINACOTA	59.95	2.6	16
ANDEAN ARC / CENTRAL ANDEAN VOLCANIC ZONE / CHILE / PARINACOTA	67.9	0.97	17
ANDEAN ARC / CENTRAL ANDEAN VOLCANIC ZONE / CHILE / PARINACOTA	68.6	0.96	17
ANDEAN ARC / CENTRAL ANDEAN VOLCANIC ZONE / CHILE / PARINACOTA	66.9	1.09	17
ANDEAN ARC / CENTRAL ANDEAN VOLCANIC ZONE / CHILE / PARINACOTA	72.16	0.47	17
ANDEAN ARC / CENTRAL ANDEAN VOLCANIC ZONE / CHILE / PARINACOTA	68.5	1.1	18
ANDEAN ARC / CENTRAL ANDEAN VOLCANIC ZONE / CHILE / PARINACOTA	58.9	3.17	18
ANDEAN ARC / CENTRAL ANDEAN VOLCANIC ZONE / CHILE / PARINACOTA	58.6	3.2	19.2538
ANDEAN ARC / CENTRAL ANDEAN VOLCANIC ZONE / CHILE / PARINACOTA	59.25	3.02	19.8989
ANDEAN ARC / CENTRAL ANDEAN VOLCANIC ZONE / CHILE / PARINACOTA	64.3	1.69	20
ANDEAN ARC / CENTRAL ANDEAN VOLCANIC ZONE / CHILE / PARINACOTA	58.36	3.65	20.2681
ANDEAN ARC / CENTRAL ANDEAN VOLCANIC ZONE / CHILE / PARINACOTA	53.14	5.01	20.7
ANDEAN ARC / CENTRAL ANDEAN VOLCANIC ZONE / CHILE / PARINACOTA	53.13	4.98	20.8
ANDEAN ARC / CENTRAL ANDEAN VOLCANIC ZONE / CHILE / PARINACOTA	68.2	0.94	21
ANDEAN ARC / CENTRAL ANDEAN VOLCANIC ZONE / CHILE / PARINACOTA	66.9	1	21
ANDEAN ARC / CENTRAL ANDEAN VOLCANIC ZONE / CHILE / PARINACOTA	66.01	1.35	21.8266
ANDEAN ARC / CENTRAL ANDEAN VOLCANIC ZONE / CHILE / PARINACOTA	61.2	2.72	23
ANDEAN ARC / CENTRAL ANDEAN VOLCANIC ZONE / CHILE / PARINACOTA	68.4	1.08	23
ANDEAN ARC / CENTRAL ANDEAN VOLCANIC ZONE / CHILE / PARINACOTA	59.8	2.92	25
ANDEAN ARC / CENTRAL ANDEAN VOLCANIC ZONE / CHILE / PARINACOTA	63.6	1.84	25
ANDEAN ARC / CENTRAL ANDEAN VOLCANIC ZONE / CHILE / PARINACOTA	68.69	1.04	25.1509
ANDEAN ARC / CENTRAL ANDEAN VOLCANIC ZONE / CHILE / PARINACOTA	61.6	2.24	26
ANDEAN ARC / CENTRAL ANDEAN VOLCANIC ZONE / CHILE / PARINACOTA	66.83	1.26	27
ANDEAN ARC / CENTRAL ANDEAN VOLCANIC ZONE / CHILE / PARINACOTA	57.3	3.44	27
ANDEAN ARC / CENTRAL ANDEAN VOLCANIC ZONE / CHILE / PARINACOTA	63.4	1.78	28
ANDEAN ARC / CENTRAL ANDEAN VOLCANIC ZONE / CHILE / PARINACOTA	63.8	1.77	28
ANDEAN ARC / CENTRAL ANDEAN VOLCANIC ZONE / CHILE / PARINACOTA	72.2	0.45	28
ANDEAN ARC / CENTRAL ANDEAN VOLCANIC ZONE / CHILE / PARINACOTA	58.7	3.25	28
ANDEAN ARC / CENTRAL ANDEAN VOLCANIC ZONE / CHILE / PARINACOTA	56.35	4.17	28.1481
ANDEAN ARC / CENTRAL ANDEAN VOLCANIC ZONE / CHILE / PARINACOTA	58	2.93	29
ANDEAN ARC / CENTRAL ANDEAN VOLCANIC ZONE / CHILE / PARINACOTA	63.5	1.93	29
ANDEAN ARC / CENTRAL ANDEAN VOLCANIC ZONE / CHILE / PARINACOTA	56.52	4.23	29
ANDEAN ARC / CENTRAL ANDEAN VOLCANIC ZONE / CHILE / PARINACOTA	64.4	1.77	30
ANDEAN ARC / CENTRAL ANDEAN VOLCANIC ZONE / CHILE / PARINACOTA	63.44	2.03	30
ANDEAN ARC / CENTRAL ANDEAN VOLCANIC ZONE / CHILE / PARINACOTA	63.9	1.85	32
ANDEAN ARC / CENTRAL ANDEAN VOLCANIC ZONE / CHILE / PARINACOTA	63.34	2.15	32
ANDEAN ARC / CENTRAL ANDEAN VOLCANIC ZONE / CHILE / PARINACOTA	59.66	2.96	32.6492
ANDEAN ARC / CENTRAL ANDEAN VOLCANIC ZONE / CHILE / PARINACOTA	61	2.73	33
ANDEAN ARC / CENTRAL ANDEAN VOLCANIC ZONE / CHILE / PARINACOTA	62.6	2.1	33.7608
ANDEAN ARC / CENTRAL ANDEAN VOLCANIC ZONE / CHILE / PARINACOTA	62.2	2.3	34
ANDEAN ARC / CENTRAL ANDEAN VOLCANIC ZONE / CHILE / PARINACOTA	63.1	2.06	35
ANDEAN ARC / CENTRAL ANDEAN VOLCANIC ZONE / CHILE / PARINACOTA	56.47	4.01	35.2586
ANDEAN ARC / CENTRAL ANDEAN VOLCANIC ZONE / CHILE / PARINACOTA	69.8	0.73	36.1168
ANDEAN ARC / CENTRAL ANDEAN VOLCANIC ZONE / CHILE / PARINACOTA	63.1	1.96	37
ANDEAN ARC / CENTRAL ANDEAN VOLCANIC ZONE / CHILE / PARINACOTA	59.9	3.06	39
ANDEAN ARC / CENTRAL ANDEAN VOLCANIC ZONE / CHILE / PARINACOTA	59.7	2.95	39
ANDEAN ARC / CENTRAL ANDEAN VOLCANIC ZONE / CHILE / PARINACOTA	53.32	4.98	39.2568
ANDEAN ARC / CENTRAL ANDEAN VOLCANIC ZONE / CHILE / PARINACOTA	59.25	3.02	40
ANDEAN ARC / CENTRAL ANDEAN VOLCANIC ZONE / CHILE / PARINACOTA	51.4	5.98	40
ANDEAN ARC / CENTRAL ANDEAN VOLCANIC ZONE / CHILE / PARINACOTA	59.1	3.2	40.3491
ANDEAN ARC / CENTRAL ANDEAN VOLCANIC ZONE / CHILE / PARINACOTA	60.8	2.57	41
ANDEAN ARC / CENTRAL ANDEAN VOLCANIC ZONE / CHILE / PARINACOTA	58.65	2.87	41.32
ANDEAN ARC / CENTRAL ANDEAN VOLCANIC ZONE / CHILE / PARINACOTA	67.59	1.12	41.5478
ANDEAN ARC / CENTRAL ANDEAN VOLCANIC ZONE / CHILE / PARINACOTA	61.7	2.26	42
ANDEAN ARC / CENTRAL ANDEAN VOLCANIC ZONE / CHILE / PARINACOTA	60.61	2.21	42
ANDEAN ARC / CENTRAL ANDEAN VOLCANIC ZONE / CHILE / PARINACOTA	59.23	3.33	43.0862
ANDEAN ARC / CENTRAL ANDEAN VOLCANIC ZONE / CHILE / PARINACOTA	59.2	3.14	44
ANDEAN ARC / CENTRAL ANDEAN VOLCANIC ZONE / CHILE / PARINACOTA	57.5	3.23	45
ANDEAN ARC / CENTRAL ANDEAN VOLCANIC ZONE / CHILE / PARINACOTA	58	3.22	45
ANDEAN ARC / CENTRAL ANDEAN VOLCANIC ZONE / CHILE / PARINACOTA	59.5	2.9	45
ANDEAN ARC / CENTRAL ANDEAN VOLCANIC ZONE / CHILE / PARINACOTA	58.3	3.08	46
ANDEAN ARC / CENTRAL ANDEAN VOLCANIC ZONE / CHILE / PARINACOTA	61.8	2.58	46
ANDEAN ARC / CENTRAL ANDEAN VOLCANIC ZONE / CHILE / PARINACOTA	58.1	3.47	46
ANDEAN ARC / CENTRAL ANDEAN VOLCANIC ZONE / CHILE / PARINACOTA	64.2	1.85	46
ANDEAN ARC / CENTRAL ANDEAN VOLCANIC ZONE / CHILE / PARINACOTA	59.1	2.93	47
ANDEAN ARC / CENTRAL ANDEAN VOLCANIC ZONE / CHILE / PARINACOTA	58.4	3.1	47
ANDEAN ARC / CENTRAL ANDEAN VOLCANIC ZONE / CHILE / PARINACOTA	57.9	3.57	47
ANDEAN ARC / CENTRAL ANDEAN VOLCANIC ZONE / CHILE / PARINACOTA	58.6	3.06	48
ANDEAN ARC / CENTRAL ANDEAN VOLCANIC ZONE / CHILE / PARINACOTA	62.3	2.04	48
ANDEAN ARC / CENTRAL ANDEAN VOLCANIC ZONE / CHILE / PARINACOTA	59	3.04	49
ANDEAN ARC / CENTRAL ANDEAN VOLCANIC ZONE / CHILE / PARINACOTA	59.1	3.21	50
ANDEAN ARC / CENTRAL ANDEAN VOLCANIC ZONE / CHILE / PARINACOTA	57.9	3.14	50
ANDEAN ARC / CENTRAL ANDEAN VOLCANIC ZONE / CHILE / PARINACOTA	58.7	3.21	51
ANDEAN ARC / CENTRAL ANDEAN VOLCANIC ZONE / CHILE / PARINACOTA	61.88	2.24	54
ANDEAN ARC / CENTRAL ANDEAN VOLCANIC ZONE / CHILE / PARINACOTA	60.9	2.7	57
ANDEAN ARC / CENTRAL ANDEAN VOLCANIC ZONE / CHILE / PARINACOTA	59.1	3.18	58
ANDEAN ARC / CENTRAL ANDEAN VOLCANIC ZONE / CHILE / PARINACOTA	58.6	2.84	59
ANDEAN ARC / CENTRAL ANDEAN VOLCANIC ZONE / CHILE / PARINACOTA	58.3	2.95	59
ANDEAN ARC / CENTRAL ANDEAN VOLCANIC ZONE / CHILE / PARINACOTA	59.85	2.89	60.9539
ANDEAN ARC / CENTRAL ANDEAN VOLCANIC ZONE / CHILE / PARINACOTA	61.05	2.58	61.3395
ANDEAN ARC / CENTRAL ANDEAN VOLCANIC ZONE / CHILE / PARINACOTA	60.07	2.94	62.1974
ANDEAN ARC / CENTRAL ANDEAN VOLCANIC ZONE / CHILE / PARINACOTA	67.82	1.03	62.6514
ANDEAN ARC / CENTRAL ANDEAN VOLCANIC ZONE / CHILE / PARINACOTA	58.66	3.64	66.7431
ANDEAN ARC / CENTRAL ANDEAN VOLCANIC ZONE / CHILE / PARINACOTA	53.21	5.05	67.5701
ANDEAN ARC / CENTRAL ANDEAN VOLCANIC ZONE / CHILE / PARINACOTA	56.55	4.05	73.5762
ANDEAN ARC / CENTRAL ANDEAN VOLCANIC ZONE / CHILE / PARINACOTA	58.46	3.34	81.8011
ANDEAN ARC / CENTRAL ANDEAN VOLCANIC ZONE / CHILE / PARINACOTA	63.04	1.3	95.5184
ANDEAN ARC / CENTRAL ANDEAN VOLCANIC ZONE / CHILE / PARINACOTA / AJATA FLOW	58.5	3.26	40
ANDEAN ARC / CENTRAL ANDEAN VOLCANIC ZONE / CHILE / PARINACOTA / AJATA FLOW	58.7	3.18	44
ANDEAN ARC / CENTRAL ANDEAN VOLCANIC ZONE / CHILE / PARINACOTA / AJATA FLOW	58.5	3.2	45
ANDEAN ARC / CENTRAL ANDEAN VOLCANIC ZONE / CHILE / PARINACOTA / AJATA FLOW	58.93	3.27	59
ANDEAN ARC / CENTRAL ANDEAN VOLCANIC ZONE / CHILE / PARINACOTA / AJATA FLOW	53.32	5.03	65
ANDEAN ARC / CENTRAL ANDEAN VOLCANIC ZONE / CHILE / PARINACOTA / AJATA FLOW	54.04	4.79	71
ANDEAN ARC / CENTRAL ANDEAN VOLCANIC ZONE / CHILE / PARINACOTA / AJATA FLOW	53.1	5.04	77
ANDEAN ARC / CENTRAL ANDEAN VOLCANIC ZONE / CHILE / PARINACOTA / AJATA FLOW	56.66	4.15	77
ANDEAN ARC / CENTRAL ANDEAN VOLCANIC ZONE / CHILE / PIEDRAS NEGRAS	52.5	6	40
ANDEAN ARC / CENTRAL ANDEAN VOLCANIC ZONE / CHILE / POMERAPE	54.21	4.92	63
ANDEAN ARC / CENTRAL ANDEAN VOLCANIC ZONE / CHILE / PORQUESA	67.05	0.98	12
ANDEAN ARC / CENTRAL ANDEAN VOLCANIC ZONE / CHILE / PUNTAS NEGRAS	59.66	2.43	13
ANDEAN ARC / CENTRAL ANDEAN VOLCANIC ZONE / CHILE / PUNTAS NEGRAS	65.29	1.96	23
ANDEAN ARC / CENTRAL ANDEAN VOLCANIC ZONE / CHILE / PUNTILLA	56.54	2.73	3.03381
ANDEAN ARC / CENTRAL ANDEAN VOLCANIC ZONE / CHILE / PUQUINTICA	63.93	1.77	2.77493
ANDEAN ARC / CENTRAL ANDEAN VOLCANIC ZONE / CHILE / PUQUINTICA	55.98	3.4	3.26671
ANDEAN ARC / CENTRAL ANDEAN VOLCANIC ZONE / CHILE / PUQUINTICA	60.45	2.45	18
ANDEAN ARC / CENTRAL ANDEAN VOLCANIC ZONE / CHILE / PUQUINTICA	60.45	2.39	21
ANDEAN ARC / CENTRAL ANDEAN VOLCANIC ZONE / CHILE / PUQUINTICA	60.55	2.24	22
ANDEAN ARC / CENTRAL ANDEAN VOLCANIC ZONE / CHILE / PUQUINTICA	55.98	3.64	41
ANDEAN ARC / CENTRAL ANDEAN VOLCANIC ZONE / CHILE / PUQUINTICA	57.67	3.81	47
ANDEAN ARC / CENTRAL ANDEAN VOLCANIC ZONE / CHILE / SAN FRANCISCO	57.95	3.88	27
ANDEAN ARC / CENTRAL ANDEAN VOLCANIC ZONE / CHILE / SAN PEDRO	55.28	4.3	34
ANDEAN ARC / CENTRAL ANDEAN VOLCANIC ZONE / CHILE / SAN PEDRO	55.75	5.52	35
ANDEAN ARC / CENTRAL ANDEAN VOLCANIC ZONE / CHILE / SAN PEDRO	55.17	5.5	37
ANDEAN ARC / CENTRAL ANDEAN VOLCANIC ZONE / CHILE / SAN PEDRO	58.3	2.2	45
ANDEAN ARC / CENTRAL ANDEAN VOLCANIC ZONE / CHILE / SAN PEDRO	62.84	2.25	48
ANDEAN ARC / CENTRAL ANDEAN VOLCANIC ZONE / CHILE / SAN PEDRO	57.59	5.32	77
ANDEAN ARC / CENTRAL ANDEAN VOLCANIC ZONE / CHILE / SAN PEDRO	59.01	5.08	201.6
ANDEAN ARC / CENTRAL ANDEAN VOLCANIC ZONE / CHILE / SAN PEDRO-SAN PABLO	61	1.75	6
ANDEAN ARC / CENTRAL ANDEAN VOLCANIC ZONE / CHILE / SAN PEDRO-SAN PABLO	63.3	2.38	15
ANDEAN ARC / CENTRAL ANDEAN VOLCANIC ZONE / CHILE / SAN PEDRO-SAN PABLO	61.8	3.37	16
ANDEAN ARC / CENTRAL ANDEAN VOLCANIC ZONE / CHILE / SAN PEDRO-SAN PABLO VOLCANIC COMPLEX	63.6	1.65	7.968
ANDEAN ARC / CENTRAL ANDEAN VOLCANIC ZONE / CHILE / SAN PEDRO-SAN PABLO VOLCANIC COMPLEX	64.1	2.26	72.3982
ANDEAN ARC / CENTRAL ANDEAN VOLCANIC ZONE / CHILE / SANTA ROSA	58.75	2.49	12
ANDEAN ARC / CENTRAL ANDEAN VOLCANIC ZONE / CHILE / SANTA ROSA	62.47	1.88	17
ANDEAN ARC / CENTRAL ANDEAN VOLCANIC ZONE / CHILE / SIERRAS DE VELADERO	62.4	2.56	18
ANDEAN ARC / CENTRAL ANDEAN VOLCANIC ZONE / CHILE / SIERRAS DE VELADERO	62.89	2.47	22
ANDEAN ARC / CENTRAL ANDEAN VOLCANIC ZONE / CHILE / SIERRAS DE VELADERO / VELADERO DOME	64.3	1.93	17
ANDEAN ARC / CENTRAL ANDEAN VOLCANIC ZONE / CHILE / SOCOMPA	56.4	4.57	6
ANDEAN ARC / CENTRAL ANDEAN VOLCANIC ZONE / CHILE / SOCOMPA	65.7	1.63	7
ANDEAN ARC / CENTRAL ANDEAN VOLCANIC ZONE / CHILE / SOCOMPA	65.83	1.76	26
ANDEAN ARC / CENTRAL ANDEAN VOLCANIC ZONE / CHILE / SOCOMPA	62.77	2.98	32
ANDEAN ARC / CENTRAL ANDEAN VOLCANIC ZONE / CHILE / SOCOMPA	63.7	2.1	36
ANDEAN ARC / CENTRAL ANDEAN VOLCANIC ZONE / CHILE / SOCOMPA	63	2.25	45
ANDEAN ARC / CENTRAL ANDEAN VOLCANIC ZONE / CHILE / SOCOMPA	64.4	2.3	45
ANDEAN ARC / CENTRAL ANDEAN VOLCANIC ZONE / CHILE / SOCOMPA	58.7	3.34	52
ANDEAN ARC / CENTRAL ANDEAN VOLCANIC ZONE / CHILE / SOCOMPA	57.2	4.3	65
ANDEAN ARC / CENTRAL ANDEAN VOLCANIC ZONE / CHILE / SOCOMPA	58.5	3.7	75
ANDEAN ARC / CENTRAL ANDEAN VOLCANIC ZONE / CHILE / SOCOMPA	55.84	6.01	111
ANDEAN ARC / CENTRAL ANDEAN VOLCANIC ZONE / CHILE / TAAPACA VOLCANIC CENTER	69.35	0.61	2.74567
ANDEAN ARC / CENTRAL ANDEAN VOLCANIC ZONE / CHILE / TAAPACA VOLCANIC CENTER	62.14	2.41	3
ANDEAN ARC / CENTRAL ANDEAN VOLCANIC ZONE / CHILE / TAAPACA VOLCANIC CENTER	65.3	1.55	3.1
ANDEAN ARC / CENTRAL ANDEAN VOLCANIC ZONE / CHILE / TAAPACA VOLCANIC CENTER	62.5	1.89	3.33871
ANDEAN ARC / CENTRAL ANDEAN VOLCANIC ZONE / CHILE / TAAPACA VOLCANIC CENTER	63.8	1.81	5
ANDEAN ARC / CENTRAL ANDEAN VOLCANIC ZONE / CHILE / TAAPACA VOLCANIC CENTER	63.5	1.83	5
ANDEAN ARC / CENTRAL ANDEAN VOLCANIC ZONE / CHILE / TAAPACA VOLCANIC CENTER	64.5	1.35	5
ANDEAN ARC / CENTRAL ANDEAN VOLCANIC ZONE / CHILE / TAAPACA VOLCANIC CENTER	64.4	1.6	5.01052
ANDEAN ARC / CENTRAL ANDEAN VOLCANIC ZONE / CHILE / TAAPACA VOLCANIC CENTER	64.5	1.47	6
ANDEAN ARC / CENTRAL ANDEAN VOLCANIC ZONE / CHILE / TAAPACA VOLCANIC CENTER	53.2	4.45	6.36452
ANDEAN ARC / CENTRAL ANDEAN VOLCANIC ZONE / CHILE / TAAPACA VOLCANIC CENTER	62.8	1.54	7
ANDEAN ARC / CENTRAL ANDEAN VOLCANIC ZONE / CHILE / TAAPACA VOLCANIC CENTER	64.9	1.65	7
ANDEAN ARC / CENTRAL ANDEAN VOLCANIC ZONE / CHILE / TAAPACA VOLCANIC CENTER	64.4	1.82	8
ANDEAN ARC / CENTRAL ANDEAN VOLCANIC ZONE / CHILE / TAAPACA VOLCANIC CENTER	63.4	1.28	8
ANDEAN ARC / CENTRAL ANDEAN VOLCANIC ZONE / CHILE / TAAPACA VOLCANIC CENTER	62.94	2.52	9
ANDEAN ARC / CENTRAL ANDEAN VOLCANIC ZONE / CHILE / TAAPACA VOLCANIC CENTER	64.8	1.85	11
ANDEAN ARC / CENTRAL ANDEAN VOLCANIC ZONE / CHILE / TAAPACA VOLCANIC CENTER	64.93	1.61	16
ANDEAN ARC / CENTRAL ANDEAN VOLCANIC ZONE / CHILE / TAAPACA VOLCANIC CENTER	62.14	2.21	16
ANDEAN ARC / CENTRAL ANDEAN VOLCANIC ZONE / CHILE / TAAPACA VOLCANIC CENTER	65.3	1.46	18
ANDEAN ARC / CENTRAL ANDEAN VOLCANIC ZONE / CHILE / TAAPACA VOLCANIC CENTER	53.39	4.27	20
ANDEAN ARC / CENTRAL ANDEAN VOLCANIC ZONE / CHILE / TAAPACA VOLCANIC CENTER	63.1	1.89	26
ANDEAN ARC / CENTRAL ANDEAN VOLCANIC ZONE / CHILE / TAAPACA VOLCANIC CENTER	61.6	2.43	29
ANDEAN ARC / CENTRAL ANDEAN VOLCANIC ZONE / CHILE / TAAPACA VOLCANIC CENTER	62.4	2.49	33
ANDEAN ARC / CENTRAL ANDEAN VOLCANIC ZONE / CHILE / TAAPACA VOLCANIC CENTER	66	1.41	36
ANDEAN ARC / CENTRAL ANDEAN VOLCANIC ZONE / CHILE / TAAPACA VOLCANIC CENTER	64.1	1.95	36
ANDEAN ARC / CENTRAL ANDEAN VOLCANIC ZONE / CHILE / TAAPACA VOLCANIC CENTER	56.8	3.51	38.7649
ANDEAN ARC / CENTRAL ANDEAN VOLCANIC ZONE / CHILE / TAAPACA VOLCANIC CENTER	64.6	1.74	39
ANDEAN ARC / CENTRAL ANDEAN VOLCANIC ZONE / CHILE / TAAPACA VOLCANIC CENTER	65.2	1.4	39
ANDEAN ARC / CENTRAL ANDEAN VOLCANIC ZONE / CHILE / TAAPACA VOLCANIC CENTER	65.2	1.66	41.5216
ANDEAN ARC / CENTRAL ANDEAN VOLCANIC ZONE / CHILE / TAAPACA VOLCANIC CENTER	61.45	2.62	44.8137
ANDEAN ARC / CENTRAL ANDEAN VOLCANIC ZONE / CHILE / TAAPACA VOLCANIC CENTER	54.68	3.61	47
ANDEAN ARC / CENTRAL ANDEAN VOLCANIC ZONE / CHILE / TAAPACA VOLCANIC CENTER	64.8	1.7	49
ANDEAN ARC / CENTRAL ANDEAN VOLCANIC ZONE / CHILE / TAAPACA VOLCANIC CENTER	64.1	1.82	67.9412
ANDEAN ARC / CENTRAL ANDEAN VOLCANIC ZONE / CHILE / TAAPACA VOLCANIC CENTER	65.5	1.46	75
ANDEAN ARC / CENTRAL ANDEAN VOLCANIC ZONE / CHILE / TAAPACA VOLCANIC CENTER	64.5	1.7	83
ANDEAN ARC / CENTRAL ANDEAN VOLCANIC ZONE / CHILE / TAAPACA VOLCANIC CENTER	64.9	1.59	89
ANDEAN ARC / CENTRAL ANDEAN VOLCANIC ZONE / CHILE / TAAPACA VOLCANIC CENTER	63.6	1.81	104
ANDEAN ARC / CENTRAL ANDEAN VOLCANIC ZONE / CHILE / TAAPACA VOLCANIC CENTER	63.6	1.58	107
ANDEAN ARC / CENTRAL ANDEAN VOLCANIC ZONE / CHILE / TACORA	60.15	2.73	22
ANDEAN ARC / CENTRAL ANDEAN VOLCANIC ZONE / CHILE / TACORA	60.25	2.82	36
ANDEAN ARC / CENTRAL ANDEAN VOLCANIC ZONE / CHILE / TACORA	62.54	3.28	36
ANDEAN ARC / CENTRAL ANDEAN VOLCANIC ZONE / CHILE / TACORA	63.14	1.84	36
ANDEAN ARC / CENTRAL ANDEAN VOLCANIC ZONE / CHILE / TACORA	60.75	2.4	46
ANDEAN ARC / CENTRAL ANDEAN VOLCANIC ZONE / CHILE / TACORA	61.25	2.44	48
ANDEAN ARC / CENTRAL ANDEAN VOLCANIC ZONE / CHILE / TACORA	59.06	2.58	49
ANDEAN ARC / CENTRAL ANDEAN VOLCANIC ZONE / CHILE / TACORA	55.68	4.41	52
ANDEAN ARC / CENTRAL ANDEAN VOLCANIC ZONE / CHILE / TRES CRUCES	68.43	0.83	13
ANDEAN ARC / CENTRAL ANDEAN VOLCANIC ZONE / CHILE / TUMISA	61.5	2.3	20
ANDEAN ARC / CENTRAL ANDEAN VOLCANIC ZONE / CHILE / VOLCAN DEL INCA	58.08	3.21	34
ANDEAN ARC / CENTRAL ANDEAN VOLCANIC ZONE / CHILE / VOLCAN PASTILLITO	59.51	2.7	27
ANDEAN ARC / CENTRAL ANDEAN VOLCANIC ZONE / CHILE / WHEELWRIGHT	64.5	1.4	9.5
ANDEAN ARC / CENTRAL ANDEAN VOLCANIC ZONE / CHILE / WHEELWRIGHT	63.13	2.23	15
ANDEAN ARC / CENTRAL ANDEAN VOLCANIC ZONE / CHILE / WHEELWRIGHT	63.1	2.15	20
ANDEAN ARC / CENTRAL ANDEAN VOLCANIC ZONE / CHILE / WHEELWRIGHT	56.05	4.3	31
ANDEAN ARC / SOUTHERN ANDEAN VOLCANIC ZONE / CHILE	63.2518	1.83736	36.8601
ANDEAN ARC / SOUTHERN ANDEAN VOLCANIC ZONE / CHILE	53.3103	4.63699	43.0582
ANDEAN ARC / SOUTHERN ANDEAN VOLCANIC ZONE / CHILE	57.2054	4.02341	54.1077
ANDEAN ARC / SOUTHERN ANDEAN VOLCANIC ZONE / CHILE	59.4054	3.21784	60.5358
ANDEAN ARC / SOUTHERN ANDEAN VOLCANIC ZONE / CHILE	53.046	4.94975	61.2263
ANDEAN ARC / SOUTHERN ANDEAN VOLCANIC ZONE / CHILE	54.9453	4.82736	62.2425
ANDEAN ARC / SOUTHERN ANDEAN VOLCANIC ZONE / CHILE	58.6946	3.77366	65.1257
ANDEAN ARC / SOUTHERN ANDEAN VOLCANIC ZONE / CHILE	53.56	5.07	88.7079
ANDEAN ARC / SOUTHERN ANDEAN VOLCANIC ZONE / CHILE / ANTICURA	51.18	4.77	78
ANDEAN ARC / SOUTHERN ANDEAN VOLCANIC ZONE / CHILE / ANTILLANCA VOLCANIC GROUP	52	4.86	87
ANDEAN ARC / SOUTHERN ANDEAN VOLCANIC ZONE / CHILE / ANTUCO	62.536	1.953	5.41077
ANDEAN ARC / SOUTHERN ANDEAN VOLCANIC ZONE / CHILE / ANTUCO	64.49	1.22	8.62
ANDEAN ARC / SOUTHERN ANDEAN VOLCANIC ZONE / CHILE / ANTUCO	58.28	2.65	10
ANDEAN ARC / SOUTHERN ANDEAN VOLCANIC ZONE / CHILE / ANTUCO	57.75	2.68	12.05
ANDEAN ARC / SOUTHERN ANDEAN VOLCANIC ZONE / CHILE / ANTUCO	59.21	2.06	15.68
ANDEAN ARC / SOUTHERN ANDEAN VOLCANIC ZONE / CHILE / ANTUCO	57.47	2.73	16.27
ANDEAN ARC / SOUTHERN ANDEAN VOLCANIC ZONE / CHILE / ANTUCO	60.2	2.4	18.62
ANDEAN ARC / SOUTHERN ANDEAN VOLCANIC ZONE / CHILE / ANTUCO	60.15	2.39	19.01
ANDEAN ARC / SOUTHERN ANDEAN VOLCANIC ZONE / CHILE / ANTUCO	58.35	2.45	19.4
ANDEAN ARC / SOUTHERN ANDEAN VOLCANIC ZONE / CHILE / ANTUCO	60.13	2.25	20.79
ANDEAN ARC / SOUTHERN ANDEAN VOLCANIC ZONE / CHILE / ANTUCO	58.2015	2.5212	21.5569
ANDEAN ARC / SOUTHERN ANDEAN VOLCANIC ZONE / CHILE / ANTUCO	59.73	2.37	22.64
ANDEAN ARC / SOUTHERN ANDEAN VOLCANIC ZONE / CHILE / ANTUCO	60.024	2.427	24.9706
ANDEAN ARC / SOUTHERN ANDEAN VOLCANIC ZONE / CHILE / ANTUCO	55.52	2.95	32.83
ANDEAN ARC / SOUTHERN ANDEAN VOLCANIC ZONE / CHILE / ANTUCO	55.52	3.98	36.26
ANDEAN ARC / SOUTHERN ANDEAN VOLCANIC ZONE / CHILE / ANTUCO	52.27	5.38	43.12
ANDEAN ARC / SOUTHERN ANDEAN VOLCANIC ZONE / CHILE / ANTUCO	53.299	6.025	43.9648
ANDEAN ARC / SOUTHERN ANDEAN VOLCANIC ZONE / CHILE / ANTUCO	55.8	3.74	44.35
ANDEAN ARC / SOUTHERN ANDEAN VOLCANIC ZONE / CHILE / ANTUCO	61.28	1.99	46.35
ANDEAN ARC / SOUTHERN ANDEAN VOLCANIC ZONE / CHILE / ANTUCO	60.85	2.08	47.24
ANDEAN ARC / SOUTHERN ANDEAN VOLCANIC ZONE / CHILE / ANTUCO	60.918	2.066	48.6033
ANDEAN ARC / SOUTHERN ANDEAN VOLCANIC ZONE / CHILE / ANTUCO	56.499	3.576	49.7442
ANDEAN ARC / SOUTHERN ANDEAN VOLCANIC ZONE / CHILE / ANTUCO	53.408	4.264	54.3566
ANDEAN ARC / SOUTHERN ANDEAN VOLCANIC ZONE / CHILE / ANTUCO	52.37	5.13	54.88
ANDEAN ARC / SOUTHERN ANDEAN VOLCANIC ZONE / CHILE / ANTUCO	52.28	3.52	55
ANDEAN ARC / SOUTHERN ANDEAN VOLCANIC ZONE / CHILE / ANTUCO	53.55	3.14	55.08
ANDEAN ARC / SOUTHERN ANDEAN VOLCANIC ZONE / CHILE / ANTUCO	52.61	3.57	56.15
ANDEAN ARC / SOUTHERN ANDEAN VOLCANIC ZONE / CHILE / ANTUCO	53.97	4.09	56.45
ANDEAN ARC / SOUTHERN ANDEAN VOLCANIC ZONE / CHILE / ANTUCO	57.6871	1.86313	57.2309
ANDEAN ARC / SOUTHERN ANDEAN VOLCANIC ZONE / CHILE / ANTUCO	53.75	3.73	57.55
ANDEAN ARC / SOUTHERN ANDEAN VOLCANIC ZONE / CHILE / ANTUCO	54.93	4.58	57.72
ANDEAN ARC / SOUTHERN ANDEAN VOLCANIC ZONE / CHILE / ANTUCO	52.998	5.634	58.5169
ANDEAN ARC / SOUTHERN ANDEAN VOLCANIC ZONE / CHILE / ANTUCO	61.5941	1.5086	58.643
ANDEAN ARC / SOUTHERN ANDEAN VOLCANIC ZONE / CHILE / ANTUCO	62.271	1.706	58.9137
ANDEAN ARC / SOUTHERN ANDEAN VOLCANIC ZONE / CHILE / ANTUCO	49.91	7.06	60
ANDEAN ARC / SOUTHERN ANDEAN VOLCANIC ZONE / CHILE / ANTUCO	54.0712	3.64534	61.3828
ANDEAN ARC / SOUTHERN ANDEAN VOLCANIC ZONE / CHILE / ANTUCO	53.353	4.793	62.6712
ANDEAN ARC / SOUTHERN ANDEAN VOLCANIC ZONE / CHILE / ANTUCO	59.5537	1.79321	63.2007
ANDEAN ARC / SOUTHERN ANDEAN VOLCANIC ZONE / CHILE / ANTUCO	52.03	6.21	63.41
ANDEAN ARC / SOUTHERN ANDEAN VOLCANIC ZONE / CHILE / ANTUCO	53.11	5.56	63.5
ANDEAN ARC / SOUTHERN ANDEAN VOLCANIC ZONE / CHILE / ANTUCO	53.22	4.18	64.39
ANDEAN ARC / SOUTHERN ANDEAN VOLCANIC ZONE / CHILE / ANTUCO	52.83	3.56	66.63
ANDEAN ARC / SOUTHERN ANDEAN VOLCANIC ZONE / CHILE / ANTUCO	52.56	5.01	66.92
ANDEAN ARC / SOUTHERN ANDEAN VOLCANIC ZONE / CHILE / ANTUCO	52.1	3.7	67
ANDEAN ARC / SOUTHERN ANDEAN VOLCANIC ZONE / CHILE / ANTUCO	52.664	3.644	67.427
ANDEAN ARC / SOUTHERN ANDEAN VOLCANIC ZONE / CHILE / ANTUCO	51.9151	4.66226	67.8213
ANDEAN ARC / SOUTHERN ANDEAN VOLCANIC ZONE / CHILE / ANTUCO	52.45	5.68	67.99
ANDEAN ARC / SOUTHERN ANDEAN VOLCANIC ZONE / CHILE / ANTUCO	52.2	4.29	68
ANDEAN ARC / SOUTHERN ANDEAN VOLCANIC ZONE / CHILE / ANTUCO	51.48	4.89	68
ANDEAN ARC / SOUTHERN ANDEAN VOLCANIC ZONE / CHILE / ANTUCO	52.1	3.47	68
ANDEAN ARC / SOUTHERN ANDEAN VOLCANIC ZONE / CHILE / ANTUCO			68
ANDEAN ARC / SOUTHERN ANDEAN VOLCANIC ZONE / CHILE / ANTUCO	52.81	3.73	68.21
ANDEAN ARC / SOUTHERN ANDEAN VOLCANIC ZONE / CHILE / ANTUCO	53.283	6.764	68.9234
ANDEAN ARC / SOUTHERN ANDEAN VOLCANIC ZONE / CHILE / ANTUCO	54.9758	2.99821	69.2196
ANDEAN ARC / SOUTHERN ANDEAN VOLCANIC ZONE / CHILE / ANTUCO	62.7851	1.56184	69.6453
ANDEAN ARC / SOUTHERN ANDEAN VOLCANIC ZONE / CHILE / ANTUCO	52.06	5.25	71.71
ANDEAN ARC / SOUTHERN ANDEAN VOLCANIC ZONE / CHILE / ANTUCO	51.8	5.76	72.01
ANDEAN ARC / SOUTHERN ANDEAN VOLCANIC ZONE / CHILE / ANTUCO	54.89	3.4	73.4
ANDEAN ARC / SOUTHERN ANDEAN VOLCANIC ZONE / CHILE / ANTUCO	52.1307	5.08555	73.888
ANDEAN ARC / SOUTHERN ANDEAN VOLCANIC ZONE / CHILE / ANTUCO	60.76	2.19	73.99
ANDEAN ARC / SOUTHERN ANDEAN VOLCANIC ZONE / CHILE / ANTUCO	50.88	7.46	74
ANDEAN ARC / SOUTHERN ANDEAN VOLCANIC ZONE / CHILE / ANTUCO	52.273	5.447	74.695
ANDEAN ARC / SOUTHERN ANDEAN VOLCANIC ZONE / CHILE / ANTUCO	56.03	3.267	76.9794
ANDEAN ARC / SOUTHERN ANDEAN VOLCANIC ZONE / CHILE / ANTUCO	56.4	2.92	77.67
ANDEAN ARC / SOUTHERN ANDEAN VOLCANIC ZONE / CHILE / ANTUCO	51.66	5.75	78
ANDEAN ARC / SOUTHERN ANDEAN VOLCANIC ZONE / CHILE / ANTUCO	54.3	5.092	78.4474
ANDEAN ARC / SOUTHERN ANDEAN VOLCANIC ZONE / CHILE / ANTUCO	53.275	5.606	79.99
ANDEAN ARC / SOUTHERN ANDEAN VOLCANIC ZONE / CHILE / ANTUCO	54.19	3.79	86.24
ANDEAN ARC / SOUTHERN ANDEAN VOLCANIC ZONE / CHILE / ANTUCO	55.12	3.49	86.83
ANDEAN ARC / SOUTHERN ANDEAN VOLCANIC ZONE / CHILE / ANTUCO	54.34	3.79	87.42
ANDEAN ARC / SOUTHERN ANDEAN VOLCANIC ZONE / CHILE / ANTUCO	54.38	4.081	91.8979
ANDEAN ARC / SOUTHERN ANDEAN VOLCANIC ZONE / CHILE / ANTUCO	55.949	2.962	97.7571
ANDEAN ARC / SOUTHERN ANDEAN VOLCANIC ZONE / CHILE / ANTUCO			100.831
ANDEAN ARC / SOUTHERN ANDEAN VOLCANIC ZONE / CHILE / APAGADO	50.69	11.99	50
ANDEAN ARC / SOUTHERN ANDEAN VOLCANIC ZONE / CHILE / APAGADO			58
ANDEAN ARC / SOUTHERN ANDEAN VOLCANIC ZONE / CHILE / APAGADO	49.82	12.24	59
ANDEAN ARC / SOUTHERN ANDEAN VOLCANIC ZONE / CHILE / APAGADO	49.14	15.05	63
ANDEAN ARC / SOUTHERN ANDEAN VOLCANIC ZONE / CHILE / APAGADO			64
ANDEAN ARC / SOUTHERN ANDEAN VOLCANIC ZONE / CHILE / APAGADO			65
ANDEAN ARC / SOUTHERN ANDEAN VOLCANIC ZONE / CHILE / APAGADO			68.7559
ANDEAN ARC / SOUTHERN ANDEAN VOLCANIC ZONE / CHILE / APAGADO			70
ANDEAN ARC / SOUTHERN ANDEAN VOLCANIC ZONE / CHILE / APAGADO	48.2	13.44	73
ANDEAN ARC / SOUTHERN ANDEAN VOLCANIC ZONE / CHILE / APAGADO			80
ANDEAN ARC / SOUTHERN ANDEAN VOLCANIC ZONE / CHILE / CABEZA DE VACA	51.9818	6.33384	69.1308
ANDEAN ARC / SOUTHERN ANDEAN VOLCANIC ZONE / CHILE / CALBUCO	50.9	4.31	29
ANDEAN ARC / SOUTHERN ANDEAN VOLCANIC ZONE / CHILE / CALBUCO	56.35	3.07	29
ANDEAN ARC / SOUTHERN ANDEAN VOLCANIC ZONE / CHILE / CALBUCO	51.18	5.9	34
ANDEAN ARC / SOUTHERN ANDEAN VOLCANIC ZONE / CHILE / CALBUCO	58.77	3.36	37
ANDEAN ARC / SOUTHERN ANDEAN VOLCANIC ZONE / CHILE / CARRAN-LOS VENADOS VOLCANIC FIELD	49.75	7.57	29.9
ANDEAN ARC / SOUTHERN ANDEAN VOLCANIC ZONE / CHILE / CARRAN-LOS VENADOS VOLCANIC FIELD	50.26	6.63	39.1
ANDEAN ARC / SOUTHERN ANDEAN VOLCANIC ZONE / CHILE / CARRAN-LOS VENADOS VOLCANIC FIELD	51.4	4.3	61
ANDEAN ARC / SOUTHERN ANDEAN VOLCANIC ZONE / CHILE / CASABLANCA	53.7555	4.37475	77.4698
ANDEAN ARC / SOUTHERN ANDEAN VOLCANIC ZONE / CHILE / CASABLANCA	51.04	6.4	82.9
ANDEAN ARC / SOUTHERN ANDEAN VOLCANIC ZONE / CHILE / CASABLANCA	53.6	3.93	90
ANDEAN ARC / SOUTHERN ANDEAN VOLCANIC ZONE / CHILE / CAVIAHUE-COPAHUE VOLCANIC COMPLEX	53.86	4.53	40
ANDEAN ARC / SOUTHERN ANDEAN VOLCANIC ZONE / CHILE / CAVIAHUE-COPAHUE VOLCANIC COMPLEX	59.37	2.62	40
ANDEAN ARC / SOUTHERN ANDEAN VOLCANIC ZONE / CHILE / CAVIAHUE-COPAHUE VOLCANIC COMPLEX	56.68	3.59	40
ANDEAN ARC / SOUTHERN ANDEAN VOLCANIC ZONE / CHILE / CAVIAHUE-COPAHUE VOLCANIC COMPLEX	55.89	3.78	50
ANDEAN ARC / SOUTHERN ANDEAN VOLCANIC ZONE / CHILE / CAVIAHUE-COPAHUE VOLCANIC COMPLEX	56.5	3.59	50
ANDEAN ARC / SOUTHERN ANDEAN VOLCANIC ZONE / CHILE / CAVIAHUE-COPAHUE VOLCANIC COMPLEX	55.32	4.36	60
ANDEAN ARC / SOUTHERN ANDEAN VOLCANIC ZONE / CHILE / CAVIAHUE-COPAHUE VOLCANIC COMPLEX	57.21	4.08	60
ANDEAN ARC / SOUTHERN ANDEAN VOLCANIC ZONE / CHILE / CAVIAHUE-COPAHUE VOLCANIC COMPLEX	54.99	4.43	80
ANDEAN ARC / SOUTHERN ANDEAN VOLCANIC ZONE / CHILE / CERRO AZUL			102.9
ANDEAN ARC / SOUTHERN ANDEAN VOLCANIC ZONE / CHILE / CHAITEN			3.1723
ANDEAN ARC / SOUTHERN ANDEAN VOLCANIC ZONE / CHILE / CHAITEN			4.17597
ANDEAN ARC / SOUTHERN ANDEAN VOLCANIC ZONE / CHILE / CHAITEN			4.17898
ANDEAN ARC / SOUTHERN ANDEAN VOLCANIC ZONE / CHILE / CHAITEN			4.22581
ANDEAN ARC / SOUTHERN ANDEAN VOLCANIC ZONE / CHILE / CHAITEN			4.29
ANDEAN ARC / SOUTHERN ANDEAN VOLCANIC ZONE / CHILE / CHAITEN			4.5828
ANDEAN ARC / SOUTHERN ANDEAN VOLCANIC ZONE / CHILE / CHAITEN			5.04
ANDEAN ARC / SOUTHERN ANDEAN VOLCANIC ZONE / CHILE / CHAITEN			5.34
ANDEAN ARC / SOUTHERN ANDEAN VOLCANIC ZONE / CHILE / CHAITEN			5.41261
ANDEAN ARC / SOUTHERN ANDEAN VOLCANIC ZONE / CHILE / CHAITEN			5.49
ANDEAN ARC / SOUTHERN ANDEAN VOLCANIC ZONE / CHILE / CHAITEN			5.62
ANDEAN ARC / SOUTHERN ANDEAN VOLCANIC ZONE / CHILE / CHAITEN			5.69
ANDEAN ARC / SOUTHERN ANDEAN VOLCANIC ZONE / CHILE / CHAITEN			5.75
ANDEAN ARC / SOUTHERN ANDEAN VOLCANIC ZONE / CHILE / CHAITEN			6.08
ANDEAN ARC / SOUTHERN ANDEAN VOLCANIC ZONE / CHILE / CHAITEN			6.23
ANDEAN ARC / SOUTHERN ANDEAN VOLCANIC ZONE / CHILE / CHAITEN			6.32
ANDEAN ARC / SOUTHERN ANDEAN VOLCANIC ZONE / CHILE / CHAITEN			6.33
ANDEAN ARC / SOUTHERN ANDEAN VOLCANIC ZONE / CHILE / CHAITEN			6.56
ANDEAN ARC / SOUTHERN ANDEAN VOLCANIC ZONE / CHILE / CHAITEN			6.84
ANDEAN ARC / SOUTHERN ANDEAN VOLCANIC ZONE / CHILE / CHAITEN			6.88
ANDEAN ARC / SOUTHERN ANDEAN VOLCANIC ZONE / CHILE / CHAITEN			6.88
ANDEAN ARC / SOUTHERN ANDEAN VOLCANIC ZONE / CHILE / CHAITEN			7.08
ANDEAN ARC / SOUTHERN ANDEAN VOLCANIC ZONE / CHILE / CHAITEN			7.12
ANDEAN ARC / SOUTHERN ANDEAN VOLCANIC ZONE / CHILE / CHAITEN			7.35
ANDEAN ARC / SOUTHERN ANDEAN VOLCANIC ZONE / CHILE / CHAITEN			7.64
ANDEAN ARC / SOUTHERN ANDEAN VOLCANIC ZONE / CHILE / CHAITEN			7.78
ANDEAN ARC / SOUTHERN ANDEAN VOLCANIC ZONE / CHILE / CHAITEN			7.79
ANDEAN ARC / SOUTHERN ANDEAN VOLCANIC ZONE / CHILE / CHAITEN			8
ANDEAN ARC / SOUTHERN ANDEAN VOLCANIC ZONE / CHILE / CHAITEN			8.11
ANDEAN ARC / SOUTHERN ANDEAN VOLCANIC ZONE / CHILE / CHAITEN			8.24
ANDEAN ARC / SOUTHERN ANDEAN VOLCANIC ZONE / CHILE / CHAITEN			8.53
ANDEAN ARC / SOUTHERN ANDEAN VOLCANIC ZONE / CHILE / CHAITEN			8.6
ANDEAN ARC / SOUTHERN ANDEAN VOLCANIC ZONE / CHILE / CHAITEN			8.71
ANDEAN ARC / SOUTHERN ANDEAN VOLCANIC ZONE / CHILE / CHAITEN			8.95
ANDEAN ARC / SOUTHERN ANDEAN VOLCANIC ZONE / CHILE / CHAITEN			9.06
ANDEAN ARC / SOUTHERN ANDEAN VOLCANIC ZONE / CHILE / CHAITEN			9.08
ANDEAN ARC / SOUTHERN ANDEAN VOLCANIC ZONE / CHILE / CHAITEN			9.13
ANDEAN ARC / SOUTHERN ANDEAN VOLCANIC ZONE / CHILE / CHAITEN			9.32
ANDEAN ARC / SOUTHERN ANDEAN VOLCANIC ZONE / CHILE / CHAITEN			9.48
ANDEAN ARC / SOUTHERN ANDEAN VOLCANIC ZONE / CHILE / CHAITEN			9.49
ANDEAN ARC / SOUTHERN ANDEAN VOLCANIC ZONE / CHILE / CHAITEN			9.69
ANDEAN ARC / SOUTHERN ANDEAN VOLCANIC ZONE / CHILE / CHAITEN			10.57
ANDEAN ARC / SOUTHERN ANDEAN VOLCANIC ZONE / CHILE / CHAITEN			12.28
ANDEAN ARC / SOUTHERN ANDEAN VOLCANIC ZONE / CHILE / CHAITEN			12.32
ANDEAN ARC / SOUTHERN ANDEAN VOLCANIC ZONE / CHILE / CHAITEN			14.55
ANDEAN ARC / SOUTHERN ANDEAN VOLCANIC ZONE / CHILE / CHAITEN			17.15
ANDEAN ARC / SOUTHERN ANDEAN VOLCANIC ZONE / CHILE / CHAITEN			25.37
ANDEAN ARC / SOUTHERN ANDEAN VOLCANIC ZONE / CHILE / CHAITEN			25.92
ANDEAN ARC / SOUTHERN ANDEAN VOLCANIC ZONE / CHILE / CHAITEN			30.36
ANDEAN ARC / SOUTHERN ANDEAN VOLCANIC ZONE / CHILE / CHOSHUENCO	57.24	2.83	37
ANDEAN ARC / SOUTHERN ANDEAN VOLCANIC ZONE / CHILE / CHOSHUENCO	52.34	4.87	58
ANDEAN ARC / SOUTHERN ANDEAN VOLCANIC ZONE / CHILE / COPAHUE	56.2633	3.80759	35.8247
ANDEAN ARC / SOUTHERN ANDEAN VOLCANIC ZONE / CHILE / CORDON CAULLE VOLCANIC COMPLEX	70.1	0.53	16
ANDEAN ARC / SOUTHERN ANDEAN VOLCANIC ZONE / CHILE / CORDON CAULLE VOLCANIC COMPLEX	68.7	0.59	16
ANDEAN ARC / SOUTHERN ANDEAN VOLCANIC ZONE / CHILE / CORDON CAULLE VOLCANIC COMPLEX			16.8355
ANDEAN ARC / SOUTHERN ANDEAN VOLCANIC ZONE / CHILE / CORDON CAULLE VOLCANIC COMPLEX	69.5	0.5	17
ANDEAN ARC / SOUTHERN ANDEAN VOLCANIC ZONE / CHILE / CORDON CAULLE VOLCANIC COMPLEX	69.2	0.59	17
ANDEAN ARC / SOUTHERN ANDEAN VOLCANIC ZONE / CHILE / CORDON CAULLE VOLCANIC COMPLEX	68.03	0.56	17
ANDEAN ARC / SOUTHERN ANDEAN VOLCANIC ZONE / CHILE / CORDON CAULLE VOLCANIC COMPLEX	70.5	0.57	17
ANDEAN ARC / SOUTHERN ANDEAN VOLCANIC ZONE / CHILE / CORDON CAULLE VOLCANIC COMPLEX			17.8538
ANDEAN ARC / SOUTHERN ANDEAN VOLCANIC ZONE / CHILE / CORDON CAULLE VOLCANIC COMPLEX			17.9615
ANDEAN ARC / SOUTHERN ANDEAN VOLCANIC ZONE / CHILE / CORDON CAULLE VOLCANIC COMPLEX	69.3	0.54	18
ANDEAN ARC / SOUTHERN ANDEAN VOLCANIC ZONE / CHILE / CORDON CAULLE VOLCANIC COMPLEX	68.8	0.56	18
ANDEAN ARC / SOUTHERN ANDEAN VOLCANIC ZONE / CHILE / CORDON CAULLE VOLCANIC COMPLEX	67.9	0.59	18
ANDEAN ARC / SOUTHERN ANDEAN VOLCANIC ZONE / CHILE / CORDON CAULLE VOLCANIC COMPLEX	68.7	0.6	18
ANDEAN ARC / SOUTHERN ANDEAN VOLCANIC ZONE / CHILE / CORDON CAULLE VOLCANIC COMPLEX	68.88	0.61	18
ANDEAN ARC / SOUTHERN ANDEAN VOLCANIC ZONE / CHILE / CORDON CAULLE VOLCANIC COMPLEX			18.5119
ANDEAN ARC / SOUTHERN ANDEAN VOLCANIC ZONE / CHILE / CORDON CAULLE VOLCANIC COMPLEX			18.647
ANDEAN ARC / SOUTHERN ANDEAN VOLCANIC ZONE / CHILE / CORDON CAULLE VOLCANIC COMPLEX			18.7011
ANDEAN ARC / SOUTHERN ANDEAN VOLCANIC ZONE / CHILE / CORDON CAULLE VOLCANIC COMPLEX			18.85
ANDEAN ARC / SOUTHERN ANDEAN VOLCANIC ZONE / CHILE / CORDON CAULLE VOLCANIC COMPLEX			18.9934
ANDEAN ARC / SOUTHERN ANDEAN VOLCANIC ZONE / CHILE / CORDON CAULLE VOLCANIC COMPLEX	70.2	0.62	19
ANDEAN ARC / SOUTHERN ANDEAN VOLCANIC ZONE / CHILE / CORDON CAULLE VOLCANIC COMPLEX			19.4168
ANDEAN ARC / SOUTHERN ANDEAN VOLCANIC ZONE / CHILE / CORDON CAULLE VOLCANIC COMPLEX			20.2761
ANDEAN ARC / SOUTHERN ANDEAN VOLCANIC ZONE / CHILE / CORDON CAULLE VOLCANIC COMPLEX			25.5562
ANDEAN ARC / SOUTHERN ANDEAN VOLCANIC ZONE / CHILE / CORDON CAULLE VOLCANIC COMPLEX			31.3041
ANDEAN ARC / SOUTHERN ANDEAN VOLCANIC ZONE / CHILE / CORDON CAULLE VOLCANIC COMPLEX	71.4	0.57	57
ANDEAN ARC / SOUTHERN ANDEAN VOLCANIC ZONE / CHILE / HORNOPIREN	50.72	6.17	65
ANDEAN ARC / SOUTHERN ANDEAN VOLCANIC ZONE / CHILE / HORNOPIREN			65
ANDEAN ARC / SOUTHERN ANDEAN VOLCANIC ZONE / CHILE / HUDSON	61.68	1.7	4.6
ANDEAN ARC / SOUTHERN ANDEAN VOLCANIC ZONE / CHILE / HUDSON	60.92	1.75	5
ANDEAN ARC / SOUTHERN ANDEAN VOLCANIC ZONE / CHILE / HUDSON	61.56	1.74	6
ANDEAN ARC / SOUTHERN ANDEAN VOLCANIC ZONE / CHILE / HUDSON	61.47	1.75	6
ANDEAN ARC / SOUTHERN ANDEAN VOLCANIC ZONE / CHILE / HUDSON	67.86	1.29	7
ANDEAN ARC / SOUTHERN ANDEAN VOLCANIC ZONE / CHILE / HUDSON	61.96	0.96	7
ANDEAN ARC / SOUTHERN ANDEAN VOLCANIC ZONE / CHILE / HUDSON	61	1.8	7
ANDEAN ARC / SOUTHERN ANDEAN VOLCANIC ZONE / CHILE / HUDSON	61.83	1.69	7
ANDEAN ARC / SOUTHERN ANDEAN VOLCANIC ZONE / CHILE / HUDSON	56.56	1.9	8
ANDEAN ARC / SOUTHERN ANDEAN VOLCANIC ZONE / CHILE / HUDSON	60.82	1.7	8
ANDEAN ARC / SOUTHERN ANDEAN VOLCANIC ZONE / CHILE / HUDSON	61.01	1.83	8
ANDEAN ARC / SOUTHERN ANDEAN VOLCANIC ZONE / CHILE / HUDSON	62.26	0.94	8
ANDEAN ARC / SOUTHERN ANDEAN VOLCANIC ZONE / CHILE / HUDSON	59.81	1.92	9
ANDEAN ARC / SOUTHERN ANDEAN VOLCANIC ZONE / CHILE / HUDSON	62.65	1.17	9
ANDEAN ARC / SOUTHERN ANDEAN VOLCANIC ZONE / CHILE / HUDSON	65.44	0.91	10
ANDEAN ARC / SOUTHERN ANDEAN VOLCANIC ZONE / CHILE / HUDSON	59.37	2.31	11
ANDEAN ARC / SOUTHERN ANDEAN VOLCANIC ZONE / CHILE / HUDSON	61.49	0.91	11
ANDEAN ARC / SOUTHERN ANDEAN VOLCANIC ZONE / CHILE / HUDSON	57.97	1.96	11
ANDEAN ARC / SOUTHERN ANDEAN VOLCANIC ZONE / CHILE / HUDSON	60.4	2.3	12
ANDEAN ARC / SOUTHERN ANDEAN VOLCANIC ZONE / CHILE / HUDSON	61.77	1.81	13
ANDEAN ARC / SOUTHERN ANDEAN VOLCANIC ZONE / CHILE / HUDSON	61.07	1.31	13
ANDEAN ARC / SOUTHERN ANDEAN VOLCANIC ZONE / CHILE / HUDSON	57.27	1.91	14
ANDEAN ARC / SOUTHERN ANDEAN VOLCANIC ZONE / CHILE / HUDSON	55.92	2.01	14
ANDEAN ARC / SOUTHERN ANDEAN VOLCANIC ZONE / CHILE / HUDSON	62.56	1.56	15
ANDEAN ARC / SOUTHERN ANDEAN VOLCANIC ZONE / CHILE / HUDSON	61.83	1.7	15
ANDEAN ARC / SOUTHERN ANDEAN VOLCANIC ZONE / CHILE / HUDSON	61.44	1.81	18
ANDEAN ARC / SOUTHERN ANDEAN VOLCANIC ZONE / CHILE / HUDSON	61.36	1.72	25
ANDEAN ARC / SOUTHERN ANDEAN VOLCANIC ZONE / CHILE / HUDSON	54	3.46	27
ANDEAN ARC / SOUTHERN ANDEAN VOLCANIC ZONE / CHILE / HUDSON			32.2937
ANDEAN ARC / SOUTHERN ANDEAN VOLCANIC ZONE / CHILE / HUDSON	54.83	5.28	44
ANDEAN ARC / SOUTHERN ANDEAN VOLCANIC ZONE / CHILE / HUDSON	48.99	6.54	45
ANDEAN ARC / SOUTHERN ANDEAN VOLCANIC ZONE / CHILE / HUDSON	51.44	4.21	45
ANDEAN ARC / SOUTHERN ANDEAN VOLCANIC ZONE / CHILE / HUDSON	52.76	4.17	49
ANDEAN ARC / SOUTHERN ANDEAN VOLCANIC ZONE / CHILE / HUDSON	48.95	7.71	49
ANDEAN ARC / SOUTHERN ANDEAN VOLCANIC ZONE / CHILE / HUDSON	51.61	4.14	51
ANDEAN ARC / SOUTHERN ANDEAN VOLCANIC ZONE / CHILE / HUDSON	51.2	4.34	53
ANDEAN ARC / SOUTHERN ANDEAN VOLCANIC ZONE / CHILE / HUDSON	51.25	6.52	58
ANDEAN ARC / SOUTHERN ANDEAN VOLCANIC ZONE / CHILE / HUDSON	51.08	5.57	61
ANDEAN ARC / SOUTHERN ANDEAN VOLCANIC ZONE / CHILE / HUDSON / HO FORMATION	65.75	1.08	30
ANDEAN ARC / SOUTHERN ANDEAN VOLCANIC ZONE / CHILE / HUDSON / HO FORMATION			30
ANDEAN ARC / SOUTHERN ANDEAN VOLCANIC ZONE / CHILE / HUDSON / HO FORMATION	59.3	2.52	39
ANDEAN ARC / SOUTHERN ANDEAN VOLCANIC ZONE / CHILE / HUDSON / HO FORMATION	57.66	2.99	42
ANDEAN ARC / SOUTHERN ANDEAN VOLCANIC ZONE / CHILE / HUDSON / HO FORMATION			51
ANDEAN ARC / SOUTHERN ANDEAN VOLCANIC ZONE / CHILE / HUDSON / HO FORMATION			67
ANDEAN ARC / SOUTHERN ANDEAN VOLCANIC ZONE / CHILE / HUDSON / HO FORMATION			68
ANDEAN ARC / SOUTHERN ANDEAN VOLCANIC ZONE / CHILE / HUDSON / HO FORMATION			69
ANDEAN ARC / SOUTHERN ANDEAN VOLCANIC ZONE / CHILE / HUELEMOLLE	50.82	5.76	80.4
ANDEAN ARC / SOUTHERN ANDEAN VOLCANIC ZONE / CHILE / HUEQUI	62.2	2.1	8
ANDEAN ARC / SOUTHERN ANDEAN VOLCANIC ZONE / CHILE / HUEQUI	58.9	3	12
ANDEAN ARC / SOUTHERN ANDEAN VOLCANIC ZONE / CHILE / HUEQUI	59	3.1	14
ANDEAN ARC / SOUTHERN ANDEAN VOLCANIC ZONE / CHILE / HUEQUI	59.1	3.1	14
ANDEAN ARC / SOUTHERN ANDEAN VOLCANIC ZONE / CHILE / HUEQUI	58.8	3.2	17
ANDEAN ARC / SOUTHERN ANDEAN VOLCANIC ZONE / CHILE / HUEQUI	54.9	4.2	19
ANDEAN ARC / SOUTHERN ANDEAN VOLCANIC ZONE / CHILE / HUEQUI	59.6	2.6	19
ANDEAN ARC / SOUTHERN ANDEAN VOLCANIC ZONE / CHILE / HUEQUI	53.1	4.6	30
ANDEAN ARC / SOUTHERN ANDEAN VOLCANIC ZONE / CHILE / HUEQUI	53.9	4.4	50
ANDEAN ARC / SOUTHERN ANDEAN VOLCANIC ZONE / CHILE / INFERNILLO VOLCANIC COMPLEX	55.1	5.46	25.8
ANDEAN ARC / SOUTHERN ANDEAN VOLCANIC ZONE / CHILE / INFERNILLO VOLCANIC COMPLEX	55.71	4.65	30
ANDEAN ARC / SOUTHERN ANDEAN VOLCANIC ZONE / CHILE / INFERNILLO VOLCANIC COMPLEX	55.27	5.17	32
ANDEAN ARC / SOUTHERN ANDEAN VOLCANIC ZONE / CHILE / INFERNILLO VOLCANIC COMPLEX	55.4	5.28	35
ANDEAN ARC / SOUTHERN ANDEAN VOLCANIC ZONE / CHILE / INFERNILLO VOLCANIC COMPLEX	55.04	5.34	35.83
ANDEAN ARC / SOUTHERN ANDEAN VOLCANIC ZONE / CHILE / INFERNILLO VOLCANIC COMPLEX	55.02	5.13	37
ANDEAN ARC / SOUTHERN ANDEAN VOLCANIC ZONE / CHILE / INFERNILLO VOLCANIC COMPLEX	56.46	4.7	38
ANDEAN ARC / SOUTHERN ANDEAN VOLCANIC ZONE / CHILE / INFERNILLO VOLCANIC COMPLEX	54.87	5.21	39
ANDEAN ARC / SOUTHERN ANDEAN VOLCANIC ZONE / CHILE / INFERNILLO VOLCANIC COMPLEX	54.8	5.27	39.48
ANDEAN ARC / SOUTHERN ANDEAN VOLCANIC ZONE / CHILE / INFERNILLO VOLCANIC COMPLEX	54.64	5.64	40
ANDEAN ARC / SOUTHERN ANDEAN VOLCANIC ZONE / CHILE / INFERNILLO VOLCANIC COMPLEX	55.48	5.17	41
ANDEAN ARC / SOUTHERN ANDEAN VOLCANIC ZONE / CHILE / INFERNILLO VOLCANIC COMPLEX	54.6	5.58	41
ANDEAN ARC / SOUTHERN ANDEAN VOLCANIC ZONE / CHILE / INFERNILLO VOLCANIC COMPLEX	54.25	5.76	44
ANDEAN ARC / SOUTHERN ANDEAN VOLCANIC ZONE / CHILE / INFERNILLO VOLCANIC COMPLEX	55.22	5.06	44.78
ANDEAN ARC / SOUTHERN ANDEAN VOLCANIC ZONE / CHILE / INFERNILLO VOLCANIC COMPLEX	54.14	5.84	47.01
ANDEAN ARC / SOUTHERN ANDEAN VOLCANIC ZONE / CHILE / LLAIMA	65.88	0.56	8
ANDEAN ARC / SOUTHERN ANDEAN VOLCANIC ZONE / CHILE / LLAIMA	62.5	1.25	28
ANDEAN ARC / SOUTHERN ANDEAN VOLCANIC ZONE / CHILE / LLAIMA	67.23	0.56	28
ANDEAN ARC / SOUTHERN ANDEAN VOLCANIC ZONE / CHILE / LLAIMA	60.98	1.61	28
ANDEAN ARC / SOUTHERN ANDEAN VOLCANIC ZONE / CHILE / LLAIMA	60.14	2.44	30
ANDEAN ARC / SOUTHERN ANDEAN VOLCANIC ZONE / CHILE / LLAIMA	61.34	2.12	32
ANDEAN ARC / SOUTHERN ANDEAN VOLCANIC ZONE / CHILE / LLAIMA	60.02	2.38	32
ANDEAN ARC / SOUTHERN ANDEAN VOLCANIC ZONE / CHILE / LLAIMA	58.13	2.24	37
ANDEAN ARC / SOUTHERN ANDEAN VOLCANIC ZONE / CHILE / LLAIMA	66.61	0.62	40
ANDEAN ARC / SOUTHERN ANDEAN VOLCANIC ZONE / CHILE / LLAIMA	63.8	1.29	40
ANDEAN ARC / SOUTHERN ANDEAN VOLCANIC ZONE / CHILE / LLAIMA	57.75	2.04	43
ANDEAN ARC / SOUTHERN ANDEAN VOLCANIC ZONE / CHILE / LLAIMA	63.17	1.31	44
ANDEAN ARC / SOUTHERN ANDEAN VOLCANIC ZONE / CHILE / LLAIMA	59.42	1.6	44
ANDEAN ARC / SOUTHERN ANDEAN VOLCANIC ZONE / CHILE / LLAIMA	62.76	0.56	44
ANDEAN ARC / SOUTHERN ANDEAN VOLCANIC ZONE / CHILE / LLAIMA	58.85	2.5	49
ANDEAN ARC / SOUTHERN ANDEAN VOLCANIC ZONE / CHILE / LLAIMA	62.34	1.33	50
ANDEAN ARC / SOUTHERN ANDEAN VOLCANIC ZONE / CHILE / LLAIMA	59.33	2.08	50
ANDEAN ARC / SOUTHERN ANDEAN VOLCANIC ZONE / CHILE / LLAIMA	56.53	2.72	52
ANDEAN ARC / SOUTHERN ANDEAN VOLCANIC ZONE / CHILE / LLAIMA	56.13	2.04	58
ANDEAN ARC / SOUTHERN ANDEAN VOLCANIC ZONE / CHILE / LLAIMA	59.97	2.03	59
ANDEAN ARC / SOUTHERN ANDEAN VOLCANIC ZONE / CHILE / LLAIMA	62.59	0.53	59
ANDEAN ARC / SOUTHERN ANDEAN VOLCANIC ZONE / CHILE / LLAIMA	63.97	0.6	61
ANDEAN ARC / SOUTHERN ANDEAN VOLCANIC ZONE / CHILE / LLAIMA	58.88	2.58	62
ANDEAN ARC / SOUTHERN ANDEAN VOLCANIC ZONE / CHILE / LLAIMA	58.89	2.58	62
ANDEAN ARC / SOUTHERN ANDEAN VOLCANIC ZONE / CHILE / LLAIMA	56.77	2.52	63
ANDEAN ARC / SOUTHERN ANDEAN VOLCANIC ZONE / CHILE / LLAIMA	57.51	2.06	65
ANDEAN ARC / SOUTHERN ANDEAN VOLCANIC ZONE / CHILE / LLAIMA	60.46	1.23	68
ANDEAN ARC / SOUTHERN ANDEAN VOLCANIC ZONE / CHILE / LLAIMA	52.36	3.14	77.9
ANDEAN ARC / SOUTHERN ANDEAN VOLCANIC ZONE / CHILE / LLAIMA	59.46	2.09	79
ANDEAN ARC / SOUTHERN ANDEAN VOLCANIC ZONE / CHILE / LLAIMA	62.86	1.28	82
ANDEAN ARC / SOUTHERN ANDEAN VOLCANIC ZONE / CHILE / LLAIMA	59.58	1.28	84
ANDEAN ARC / SOUTHERN ANDEAN VOLCANIC ZONE / CHILE / LLAIMA	54.96	3.37	86
ANDEAN ARC / SOUTHERN ANDEAN VOLCANIC ZONE / CHILE / LLAIMA	53.1	4.21	90
ANDEAN ARC / SOUTHERN ANDEAN VOLCANIC ZONE / CHILE / LLAIMA	56.78	2.68	91
ANDEAN ARC / SOUTHERN ANDEAN VOLCANIC ZONE / CHILE / LLAIMA	55.7	3.13	91
ANDEAN ARC / SOUTHERN ANDEAN VOLCANIC ZONE / CHILE / LLAIMA	56.17	3.13	93
ANDEAN ARC / SOUTHERN ANDEAN VOLCANIC ZONE / CHILE / LLAIMA	56.61	3.25	93.4
ANDEAN ARC / SOUTHERN ANDEAN VOLCANIC ZONE / CHILE / LLAIMA	54.5985	4.40733	95.7779
ANDEAN ARC / SOUTHERN ANDEAN VOLCANIC ZONE / CHILE / LLAIMA	54.6	4.41	95.8
ANDEAN ARC / SOUTHERN ANDEAN VOLCANIC ZONE / CHILE / LLAIMA	55.84	2.76	96
ANDEAN ARC / SOUTHERN ANDEAN VOLCANIC ZONE / CHILE / LLAIMA	51.62	4.75	96
ANDEAN ARC / SOUTHERN ANDEAN VOLCANIC ZONE / CHILE / LLAIMA	52.69	5.77	96
ANDEAN ARC / SOUTHERN ANDEAN VOLCANIC ZONE / CHILE / LLAIMA	52.7	4.21	96
ANDEAN ARC / SOUTHERN ANDEAN VOLCANIC ZONE / CHILE / LLAIMA	55.7	3.91	96
ANDEAN ARC / SOUTHERN ANDEAN VOLCANIC ZONE / CHILE / LLAIMA	52.8	4.71	97
ANDEAN ARC / SOUTHERN ANDEAN VOLCANIC ZONE / CHILE / LLAIMA	51.7	5.59	98
ANDEAN ARC / SOUTHERN ANDEAN VOLCANIC ZONE / CHILE / LLAIMA	54.3	5.05	98
ANDEAN ARC / SOUTHERN ANDEAN VOLCANIC ZONE / CHILE / LLAIMA	51.47	4.9	100
ANDEAN ARC / SOUTHERN ANDEAN VOLCANIC ZONE / CHILE / LLAIMA	52.1	5.99	100
ANDEAN ARC / SOUTHERN ANDEAN VOLCANIC ZONE / CHILE / LLAIMA	52.72	4.27	101
ANDEAN ARC / SOUTHERN ANDEAN VOLCANIC ZONE / CHILE / LLAIMA	52.2	5.8	102
ANDEAN ARC / SOUTHERN ANDEAN VOLCANIC ZONE / CHILE / LLAIMA	53.1	5.49	102
ANDEAN ARC / SOUTHERN ANDEAN VOLCANIC ZONE / CHILE / LLAIMA	51.658	5.9129	102.373
ANDEAN ARC / SOUTHERN ANDEAN VOLCANIC ZONE / CHILE / LLAIMA	51.49	6.09	104
ANDEAN ARC / SOUTHERN ANDEAN VOLCANIC ZONE / CHILE / LLAIMA	51.6	5.94	105
ANDEAN ARC / SOUTHERN ANDEAN VOLCANIC ZONE / CHILE / LLAIMA	51.31	4.85	106
ANDEAN ARC / SOUTHERN ANDEAN VOLCANIC ZONE / CHILE / LLAIMA	59.53	2.29	106
ANDEAN ARC / SOUTHERN ANDEAN VOLCANIC ZONE / CHILE / LLAIMA	52.1	5.69	106
ANDEAN ARC / SOUTHERN ANDEAN VOLCANIC ZONE / CHILE / LLAIMA	57.78	2.42	107
ANDEAN ARC / SOUTHERN ANDEAN VOLCANIC ZONE / CHILE / LLAIMA	51.6	6.16	108
ANDEAN ARC / SOUTHERN ANDEAN VOLCANIC ZONE / CHILE / LLAIMA	51.59	5.53	109
ANDEAN ARC / SOUTHERN ANDEAN VOLCANIC ZONE / CHILE / LLAIMA	51.26	6.13	109
ANDEAN ARC / SOUTHERN ANDEAN VOLCANIC ZONE / CHILE / LLAIMA	51.38	5.38	109
ANDEAN ARC / SOUTHERN ANDEAN VOLCANIC ZONE / CHILE / LLAIMA	54.28	3.45	109
ANDEAN ARC / SOUTHERN ANDEAN VOLCANIC ZONE / CHILE / LLAIMA	56.14	3.4	109
ANDEAN ARC / SOUTHERN ANDEAN VOLCANIC ZONE / CHILE / LLAIMA	59.38	2.54	109
ANDEAN ARC / SOUTHERN ANDEAN VOLCANIC ZONE / CHILE / LLAIMA	51.6	6.15	110
ANDEAN ARC / SOUTHERN ANDEAN VOLCANIC ZONE / CHILE / LLAIMA	56.97	2.74	111
ANDEAN ARC / SOUTHERN ANDEAN VOLCANIC ZONE / CHILE / LLAIMA	55.26	3.66	111
ANDEAN ARC / SOUTHERN ANDEAN VOLCANIC ZONE / CHILE / LLAIMA	51.31	5.58	111
ANDEAN ARC / SOUTHERN ANDEAN VOLCANIC ZONE / CHILE / LLAIMA	51.3113	5.57558	111.415
ANDEAN ARC / SOUTHERN ANDEAN VOLCANIC ZONE / CHILE / LLAIMA	51.2	5.7	112
ANDEAN ARC / SOUTHERN ANDEAN VOLCANIC ZONE / CHILE / LLAIMA	51.8	5.34	112
ANDEAN ARC / SOUTHERN ANDEAN VOLCANIC ZONE / CHILE / LLAIMA	51.2	5.83	113
ANDEAN ARC / SOUTHERN ANDEAN VOLCANIC ZONE / CHILE / LLAIMA	52.6	5.63	114
ANDEAN ARC / SOUTHERN ANDEAN VOLCANIC ZONE / CHILE / LLAIMA	51.45	5.52	115
ANDEAN ARC / SOUTHERN ANDEAN VOLCANIC ZONE / CHILE / LLAIMA	54.1	4.54	115
ANDEAN ARC / SOUTHERN ANDEAN VOLCANIC ZONE / CHILE / LLAIMA	53.32	4.78	116
ANDEAN ARC / SOUTHERN ANDEAN VOLCANIC ZONE / CHILE / LLAIMA	55.88	3.33	116
ANDEAN ARC / SOUTHERN ANDEAN VOLCANIC ZONE / CHILE / LLAIMA	54.62	3.87	117
ANDEAN ARC / SOUTHERN ANDEAN VOLCANIC ZONE / CHILE / LLAIMA	56.23	3.04	120
ANDEAN ARC / SOUTHERN ANDEAN VOLCANIC ZONE / CHILE / LLAIMA	52.33	6.24	120
ANDEAN ARC / SOUTHERN ANDEAN VOLCANIC ZONE / CHILE / LLAIMA	52	5.54	120
ANDEAN ARC / SOUTHERN ANDEAN VOLCANIC ZONE / CHILE / LLAIMA	56.12	3.26	123
ANDEAN ARC / SOUTHERN ANDEAN VOLCANIC ZONE / CHILE / LLAIMA	52.4	5.16	123
ANDEAN ARC / SOUTHERN ANDEAN VOLCANIC ZONE / CHILE / LLAIMA	54.3	4.27	127
ANDEAN ARC / SOUTHERN ANDEAN VOLCANIC ZONE / CHILE / LLAIMA	51.88	3.43	129
ANDEAN ARC / SOUTHERN ANDEAN VOLCANIC ZONE / CHILE / LLAIMA	51.89	5.63	131
ANDEAN ARC / SOUTHERN ANDEAN VOLCANIC ZONE / CHILE / LLAIMA	51.57	5.41	131
ANDEAN ARC / SOUTHERN ANDEAN VOLCANIC ZONE / CHILE / LLAIMA	52.12	5.75	136
ANDEAN ARC / SOUTHERN ANDEAN VOLCANIC ZONE / CHILE / LLAIMA	57.52	2.59	139
ANDEAN ARC / SOUTHERN ANDEAN VOLCANIC ZONE / CHILE / LLAIMA	54.76	3.44	140
ANDEAN ARC / SOUTHERN ANDEAN VOLCANIC ZONE / CHILE / LLAIMA	52.3	3.75	141
ANDEAN ARC / SOUTHERN ANDEAN VOLCANIC ZONE / CHILE / LLAIMA	51.92	5.16	145
ANDEAN ARC / SOUTHERN ANDEAN VOLCANIC ZONE / CHILE / LLAIMA	51.64	4.79	145
ANDEAN ARC / SOUTHERN ANDEAN VOLCANIC ZONE / CHILE / LLAIMA	54.64	3.28	146
ANDEAN ARC / SOUTHERN ANDEAN VOLCANIC ZONE / CHILE / LLAIMA	55.13	3.39	149
ANDEAN ARC / SOUTHERN ANDEAN VOLCANIC ZONE / CHILE / LLAIMA	59.31	2.13	153
ANDEAN ARC / SOUTHERN ANDEAN VOLCANIC ZONE / CHILE / LLAIMA	53.03	3.92	153
ANDEAN ARC / SOUTHERN ANDEAN VOLCANIC ZONE / CHILE / LLAIMA	56.02	3.22	157
ANDEAN ARC / SOUTHERN ANDEAN VOLCANIC ZONE / CHILE / LLAIMA	54.21	4.05	161
ANDEAN ARC / SOUTHERN ANDEAN VOLCANIC ZONE / CHILE / LLAIMA	51.46	5.78	162
ANDEAN ARC / SOUTHERN ANDEAN VOLCANIC ZONE / CHILE / LLAIMA	51.45	5.37	164
ANDEAN ARC / SOUTHERN ANDEAN VOLCANIC ZONE / CHILE / LLAIMA	51.82	5.56	164
ANDEAN ARC / SOUTHERN ANDEAN VOLCANIC ZONE / CHILE / LLAIMA	55.97	3.29	164
ANDEAN ARC / SOUTHERN ANDEAN VOLCANIC ZONE / CHILE / LLAIMA	54.55	3.81	165
ANDEAN ARC / SOUTHERN ANDEAN VOLCANIC ZONE / CHILE / LLAIMA	54	3.98	166
ANDEAN ARC / SOUTHERN ANDEAN VOLCANIC ZONE / CHILE / LLAIMA	53.49	4.02	167
ANDEAN ARC / SOUTHERN ANDEAN VOLCANIC ZONE / CHILE / LLAIMA	51.86	5.46	170
ANDEAN ARC / SOUTHERN ANDEAN VOLCANIC ZONE / CHILE / LLAIMA	53.09	4.37	172
ANDEAN ARC / SOUTHERN ANDEAN VOLCANIC ZONE / CHILE / LLAIMA	52.5	4.5	175
ANDEAN ARC / SOUTHERN ANDEAN VOLCANIC ZONE / CHILE / LLAIMA	54.16	3.58	177
ANDEAN ARC / SOUTHERN ANDEAN VOLCANIC ZONE / CHILE / LLAIMA	55.13	3.5	185
ANDEAN ARC / SOUTHERN ANDEAN VOLCANIC ZONE / CHILE / LLAIMA	56.25	3.23	185
ANDEAN ARC / SOUTHERN ANDEAN VOLCANIC ZONE / CHILE / LLAIMA	53.61	4.34	185
ANDEAN ARC / SOUTHERN ANDEAN VOLCANIC ZONE / CHILE / LLAIMA	51.48	4.87	186
ANDEAN ARC / SOUTHERN ANDEAN VOLCANIC ZONE / CHILE / LLAIMA	52.84	4.64	186
ANDEAN ARC / SOUTHERN ANDEAN VOLCANIC ZONE / CHILE / LLAIMA	51.91	5.21	187
ANDEAN ARC / SOUTHERN ANDEAN VOLCANIC ZONE / CHILE / LLAIMA	52.32	5.18	187
ANDEAN ARC / SOUTHERN ANDEAN VOLCANIC ZONE / CHILE / LLAIMA	53.9	3.97	192
ANDEAN ARC / SOUTHERN ANDEAN VOLCANIC ZONE / CHILE / LLAIMA	53.89	4.2	194
ANDEAN ARC / SOUTHERN ANDEAN VOLCANIC ZONE / CHILE / LLAIMA	51.97	5.18	195
ANDEAN ARC / SOUTHERN ANDEAN VOLCANIC ZONE / CHILE / LLAIMA	51.94	5.16	203
ANDEAN ARC / SOUTHERN ANDEAN VOLCANIC ZONE / CHILE / LLAIMA	54.44	3.82	203
ANDEAN ARC / SOUTHERN ANDEAN VOLCANIC ZONE / CHILE / LLAIMA	52.07	5.24	204
ANDEAN ARC / SOUTHERN ANDEAN VOLCANIC ZONE / CHILE / LLAIMA	54	3.93	207
ANDEAN ARC / SOUTHERN ANDEAN VOLCANIC ZONE / CHILE / LLAIMA	51.45	5.31	210
ANDEAN ARC / SOUTHERN ANDEAN VOLCANIC ZONE / CHILE / LLAIMA	54.15	3.9	210
ANDEAN ARC / SOUTHERN ANDEAN VOLCANIC ZONE / CHILE / LLAIMA	55.47	3.56	210
ANDEAN ARC / SOUTHERN ANDEAN VOLCANIC ZONE / CHILE / LLAIMA	53.96	3.96	211
ANDEAN ARC / SOUTHERN ANDEAN VOLCANIC ZONE / CHILE / LLAIMA	51.35	5.28	212
ANDEAN ARC / SOUTHERN ANDEAN VOLCANIC ZONE / CHILE / LLAIMA	53.4	4.26	212
ANDEAN ARC / SOUTHERN ANDEAN VOLCANIC ZONE / CHILE / LLAIMA	53.91	4.1	215
ANDEAN ARC / SOUTHERN ANDEAN VOLCANIC ZONE / CHILE / LLAIMA	55.43	3.56	217
ANDEAN ARC / SOUTHERN ANDEAN VOLCANIC ZONE / CHILE / LLAIMA	52.4	4.88	226
ANDEAN ARC / SOUTHERN ANDEAN VOLCANIC ZONE / CHILE / LLAIMA	53.93	3.95	231
ANDEAN ARC / SOUTHERN ANDEAN VOLCANIC ZONE / CHILE / LONQUIMAY	58.09	2	10
ANDEAN ARC / SOUTHERN ANDEAN VOLCANIC ZONE / CHILE / LONQUIMAY	63.11	1.03	10
ANDEAN ARC / SOUTHERN ANDEAN VOLCANIC ZONE / CHILE / LONQUIMAY	54.6	2.94	10
ANDEAN ARC / SOUTHERN ANDEAN VOLCANIC ZONE / CHILE / LONQUIMAY	61.42	1.1	20.3
ANDEAN ARC / SOUTHERN ANDEAN VOLCANIC ZONE / CHILE / LONQUIMAY	58.21	2.03	23.9
ANDEAN ARC / SOUTHERN ANDEAN VOLCANIC ZONE / CHILE / LONQUIMAY			84.52
ANDEAN ARC / SOUTHERN ANDEAN VOLCANIC ZONE / CHILE / MACA			42.4439
ANDEAN ARC / SOUTHERN ANDEAN VOLCANIC ZONE / CHILE / MAIPO	58.72	3.68	25
ANDEAN ARC / SOUTHERN ANDEAN VOLCANIC ZONE / CHILE / MAIPO	58.29	4.09	29
ANDEAN ARC / SOUTHERN ANDEAN VOLCANIC ZONE / CHILE / MAIPO	57.15	3.32	32
ANDEAN ARC / SOUTHERN ANDEAN VOLCANIC ZONE / CHILE / MAIPO	57.41	4.54	35
ANDEAN ARC / SOUTHERN ANDEAN VOLCANIC ZONE / CHILE / MAIPO			36.332
ANDEAN ARC / SOUTHERN ANDEAN VOLCANIC ZONE / CHILE / MENCHECA	53.22	5.11	108
ANDEAN ARC / SOUTHERN ANDEAN VOLCANIC ZONE / CHILE / MENTOLAT			13
ANDEAN ARC / SOUTHERN ANDEAN VOLCANIC ZONE / CHILE / MENTOLAT			14
ANDEAN ARC / SOUTHERN ANDEAN VOLCANIC ZONE / CHILE / MENTOLAT			16
ANDEAN ARC / SOUTHERN ANDEAN VOLCANIC ZONE / CHILE / MENTOLAT			18
ANDEAN ARC / SOUTHERN ANDEAN VOLCANIC ZONE / CHILE / MENTOLAT			22
ANDEAN ARC / SOUTHERN ANDEAN VOLCANIC ZONE / CHILE / MENTOLAT			115
ANDEAN ARC / SOUTHERN ANDEAN VOLCANIC ZONE / CHILE / MOCHO-CHOSHUENCO			63
ANDEAN ARC / SOUTHERN ANDEAN VOLCANIC ZONE / CHILE / MOCHO-CHOSHUENCO			93.6842
ANDEAN ARC / SOUTHERN ANDEAN VOLCANIC ZONE / CHILE / MOCHO-CHOSHUENCO	55.85	4.49	93.7
ANDEAN ARC / SOUTHERN ANDEAN VOLCANIC ZONE / CHILE / MOCHO-CHOSHUENCO	52.07	5.25	98.4
ANDEAN ARC / SOUTHERN ANDEAN VOLCANIC ZONE / CHILE / NEVADO DE LONGAVI	64.08	1.99	11.7
ANDEAN ARC / SOUTHERN ANDEAN VOLCANIC ZONE / CHILE / NEVADO DE LONGAVI	65.09	1.98	15.4
ANDEAN ARC / SOUTHERN ANDEAN VOLCANIC ZONE / CHILE / NEVADO DE LONGAVI	63.68	2.19	16.4
ANDEAN ARC / SOUTHERN ANDEAN VOLCANIC ZONE / CHILE / NEVADO DE LONGAVI	64.8	2.03	19.4
ANDEAN ARC / SOUTHERN ANDEAN VOLCANIC ZONE / CHILE / NEVADO DE LONGAVI	64.05	2.27	21.6
ANDEAN ARC / SOUTHERN ANDEAN VOLCANIC ZONE / CHILE / NEVADO DE LONGAVI	64.22	2.48	22.9
ANDEAN ARC / SOUTHERN ANDEAN VOLCANIC ZONE / CHILE / NEVADO DE LONGAVI	64.64	2.01	22.9
ANDEAN ARC / SOUTHERN ANDEAN VOLCANIC ZONE / CHILE / NEVADO DE LONGAVI	63.45	2.48	23
ANDEAN ARC / SOUTHERN ANDEAN VOLCANIC ZONE / CHILE / NEVADO DE LONGAVI	63.26	2.28	24.3
ANDEAN ARC / SOUTHERN ANDEAN VOLCANIC ZONE / CHILE / NEVADO DE LONGAVI	63.25	2.36	24.4
ANDEAN ARC / SOUTHERN ANDEAN VOLCANIC ZONE / CHILE / NEVADO DE LONGAVI	59.0882	3.65927	24.4578
ANDEAN ARC / SOUTHERN ANDEAN VOLCANIC ZONE / CHILE / NEVADO DE LONGAVI	63.75	2.33	26.4
ANDEAN ARC / SOUTHERN ANDEAN VOLCANIC ZONE / CHILE / NEVADO DE LONGAVI	63.72	2.21	30.6
ANDEAN ARC / SOUTHERN ANDEAN VOLCANIC ZONE / CHILE / NEVADO DE LONGAVI	59.44	3.67	34.1
ANDEAN ARC / SOUTHERN ANDEAN VOLCANIC ZONE / CHILE / NEVADO DE LONGAVI	64.68	2.04	35.6
ANDEAN ARC / SOUTHERN ANDEAN VOLCANIC ZONE / CHILE / NEVADO DE LONGAVI	58.63	3.65	40.3
ANDEAN ARC / SOUTHERN ANDEAN VOLCANIC ZONE / CHILE / NEVADO DE LONGAVI	53.8	4.93	46.1
ANDEAN ARC / SOUTHERN ANDEAN VOLCANIC ZONE / CHILE / NEVADO DE LONGAVI	57.24	4.04	46.8
ANDEAN ARC / SOUTHERN ANDEAN VOLCANIC ZONE / CHILE / NEVADO DE LONGAVI	51.0385	5.02117	47.8438
ANDEAN ARC / SOUTHERN ANDEAN VOLCANIC ZONE / CHILE / NEVADO DE LONGAVI	56.5985	4.13965	52.5637
ANDEAN ARC / SOUTHERN ANDEAN VOLCANIC ZONE / CHILE / NEVADO DE LONGAVI	56.79	3.13	53.5
ANDEAN ARC / SOUTHERN ANDEAN VOLCANIC ZONE / CHILE / NEVADO DE LONGAVI	51.9952	5.69907	58.8963
ANDEAN ARC / SOUTHERN ANDEAN VOLCANIC ZONE / CHILE / NEVADO DE LONGAVI	56.61	3.64	62.6
ANDEAN ARC / SOUTHERN ANDEAN VOLCANIC ZONE / CHILE / NEVADO DE LONGAVI	59.03	3.42	63.6
ANDEAN ARC / SOUTHERN ANDEAN VOLCANIC ZONE / CHILE / NEVADO DE LONGAVI	52.2357	5.6617	63.7574
ANDEAN ARC / SOUTHERN ANDEAN VOLCANIC ZONE / CHILE / NEVADO DE LONGAVI	55.83	3.89	65.6
ANDEAN ARC / SOUTHERN ANDEAN VOLCANIC ZONE / CHILE / NEVADO DE LONGAVI	54.24	6.12	75.8
ANDEAN ARC / SOUTHERN ANDEAN VOLCANIC ZONE / CHILE / NEVADO DE LONGAVI	53.64	5.81	83.3
ANDEAN ARC / SOUTHERN ANDEAN VOLCANIC ZONE / CHILE / NEVADO DE LONGAVI	58.08	3.61	104.1
ANDEAN ARC / SOUTHERN ANDEAN VOLCANIC ZONE / CHILE / NEVADO DE LONGAVI	55.77	4.66	123.5
ANDEAN ARC / SOUTHERN ANDEAN VOLCANIC ZONE / CHILE / NEVADO DE LONGAVI	53.34	5.22	173
ANDEAN ARC / SOUTHERN ANDEAN VOLCANIC ZONE / CHILE / NEVADO DE LONGAVI	54.86	4.65	198.8
ANDEAN ARC / SOUTHERN ANDEAN VOLCANIC ZONE / CHILE / NEVADOS DE CHILLAN	67.39	1.15	14
ANDEAN ARC / SOUTHERN ANDEAN VOLCANIC ZONE / CHILE / NEVADOS DE CHILLAN	64.7	1.33	24
ANDEAN ARC / SOUTHERN ANDEAN VOLCANIC ZONE / CHILE / OSORNO	52.65	4.8	22
ANDEAN ARC / SOUTHERN ANDEAN VOLCANIC ZONE / CHILE / OSORNO	52.87	4.4	43
ANDEAN ARC / SOUTHERN ANDEAN VOLCANIC ZONE / CHILE / OSORNO	50.87	4.69	63
ANDEAN ARC / SOUTHERN ANDEAN VOLCANIC ZONE / CHILE / OSORNO	51.17	4.56	64
ANDEAN ARC / SOUTHERN ANDEAN VOLCANIC ZONE / CHILE / OSORNO	51.75	4.16	67
ANDEAN ARC / SOUTHERN ANDEAN VOLCANIC ZONE / CHILE / OSORNO	51.67	4.24	71
ANDEAN ARC / SOUTHERN ANDEAN VOLCANIC ZONE / CHILE / OSORNO	54.15	4.02	73
ANDEAN ARC / SOUTHERN ANDEAN VOLCANIC ZONE / CHILE / OSORNO	53.13	3.36	74
ANDEAN ARC / SOUTHERN ANDEAN VOLCANIC ZONE / CHILE / OSORNO	51.84	4.17	76
ANDEAN ARC / SOUTHERN ANDEAN VOLCANIC ZONE / CHILE / OSORNO	52.02	4	78
ANDEAN ARC / SOUTHERN ANDEAN VOLCANIC ZONE / CHILE / OSORNO	52.24	4.83	80.8
ANDEAN ARC / SOUTHERN ANDEAN VOLCANIC ZONE / CHILE / OSORNO	51.63	3.79	84.6
ANDEAN ARC / SOUTHERN ANDEAN VOLCANIC ZONE / CHILE / OSORNO			85
ANDEAN ARC / SOUTHERN ANDEAN VOLCANIC ZONE / CHILE / OSORNO	52.61	4.04	87
ANDEAN ARC / SOUTHERN ANDEAN VOLCANIC ZONE / CHILE / OSORNO	52.3088	4.3164	92.3276
ANDEAN ARC / SOUTHERN ANDEAN VOLCANIC ZONE / CHILE / OSORNO	53.18	3.96	94
ANDEAN ARC / SOUTHERN ANDEAN VOLCANIC ZONE / CHILE / OSORNO	52.61	5.34	100
ANDEAN ARC / SOUTHERN ANDEAN VOLCANIC ZONE / CHILE / OSORNO	52.53	5.47	102
ANDEAN ARC / SOUTHERN ANDEAN VOLCANIC ZONE / CHILE / OSORNO	51.69	5.86	106
ANDEAN ARC / SOUTHERN ANDEAN VOLCANIC ZONE / CHILE / OSORNO	54.49	3.81	122
ANDEAN ARC / SOUTHERN ANDEAN VOLCANIC ZONE / CHILE / OSORNO	54.41	3.76	128
ANDEAN ARC / SOUTHERN ANDEAN VOLCANIC ZONE / CHILE / PAJARITOS	53.47	5.36	61
ANDEAN ARC / SOUTHERN ANDEAN VOLCANIC ZONE / CHILE / PALENA	49.12	8.14	52
ANDEAN ARC / SOUTHERN ANDEAN VOLCANIC ZONE / CHILE / PALENA	48.94	8	54
ANDEAN ARC / SOUTHERN ANDEAN VOLCANIC ZONE / CHILE / PALENA			57
ANDEAN ARC / SOUTHERN ANDEAN VOLCANIC ZONE / CHILE / PALOMO	56.24	2.87	32
ANDEAN ARC / SOUTHERN ANDEAN VOLCANIC ZONE / CHILE / PUYEHUE	65.44	0.83	15
ANDEAN ARC / SOUTHERN ANDEAN VOLCANIC ZONE / CHILE / PUYEHUE	66.47	0.63	16
ANDEAN ARC / SOUTHERN ANDEAN VOLCANIC ZONE / CHILE / PUYEHUE	67.58	0.74	18
ANDEAN ARC / SOUTHERN ANDEAN VOLCANIC ZONE / CHILE / PUYEHUE	66.49	0.8	19
ANDEAN ARC / SOUTHERN ANDEAN VOLCANIC ZONE / CHILE / PUYEHUE	69.88	0.38	20
ANDEAN ARC / SOUTHERN ANDEAN VOLCANIC ZONE / CHILE / PUYEHUE	66.54	0.8	20
ANDEAN ARC / SOUTHERN ANDEAN VOLCANIC ZONE / CHILE / PUYEHUE	66.38	0.78	21
ANDEAN ARC / SOUTHERN ANDEAN VOLCANIC ZONE / CHILE / PUYEHUE	66.25	0.47	24
ANDEAN ARC / SOUTHERN ANDEAN VOLCANIC ZONE / CHILE / PUYEHUE	67.36	0.85	25
ANDEAN ARC / SOUTHERN ANDEAN VOLCANIC ZONE / CHILE / PUYEHUE	65	1.17	26
ANDEAN ARC / SOUTHERN ANDEAN VOLCANIC ZONE / CHILE / PUYEHUE	70.91	0.31	29
ANDEAN ARC / SOUTHERN ANDEAN VOLCANIC ZONE / CHILE / PUYEHUE	65.62	0.71	30
ANDEAN ARC / SOUTHERN ANDEAN VOLCANIC ZONE / CHILE / PUYEHUE	56.99	2.84	31
ANDEAN ARC / SOUTHERN ANDEAN VOLCANIC ZONE / CHILE / PUYEHUE	63.38	0.73	33
ANDEAN ARC / SOUTHERN ANDEAN VOLCANIC ZONE / CHILE / PUYEHUE	70.23	0.37	49
ANDEAN ARC / SOUTHERN ANDEAN VOLCANIC ZONE / CHILE / PUYEHUE	52.73	7.28	50
ANDEAN ARC / SOUTHERN ANDEAN VOLCANIC ZONE / CHILE / PUYEHUE	61.57	2.11	53
ANDEAN ARC / SOUTHERN ANDEAN VOLCANIC ZONE / CHILE / PUYEHUE	52.4	6.06	60
ANDEAN ARC / SOUTHERN ANDEAN VOLCANIC ZONE / CHILE / PUYEHUE	70.76	0.38	60
ANDEAN ARC / SOUTHERN ANDEAN VOLCANIC ZONE / CHILE / PUYEHUE	69.6	0.59	65
ANDEAN ARC / SOUTHERN ANDEAN VOLCANIC ZONE / CHILE / PUYEHUE	51.23	6.7	67
ANDEAN ARC / SOUTHERN ANDEAN VOLCANIC ZONE / CHILE / PUYEHUE	51.06	6.85	67
ANDEAN ARC / SOUTHERN ANDEAN VOLCANIC ZONE / CHILE / PUYEHUE	51.89	6.27	68
ANDEAN ARC / SOUTHERN ANDEAN VOLCANIC ZONE / CHILE / PUYEHUE	70.36	0.46	69
ANDEAN ARC / SOUTHERN ANDEAN VOLCANIC ZONE / CHILE / PUYEHUE	70.21	0.28	70
ANDEAN ARC / SOUTHERN ANDEAN VOLCANIC ZONE / CHILE / PUYEHUE	69.27	0.47	70
ANDEAN ARC / SOUTHERN ANDEAN VOLCANIC ZONE / CHILE / PUYEHUE	71.14	0.29	73
ANDEAN ARC / SOUTHERN ANDEAN VOLCANIC ZONE / CHILE / PUYEHUE	69.53	0.67	73
ANDEAN ARC / SOUTHERN ANDEAN VOLCANIC ZONE / CHILE / PUYEHUE	60.69	2.18	75
ANDEAN ARC / SOUTHERN ANDEAN VOLCANIC ZONE / CHILE / PUYEHUE	63.8	1.31	75
ANDEAN ARC / SOUTHERN ANDEAN VOLCANIC ZONE / CHILE / PUYEHUE	70.25	0.64	77
ANDEAN ARC / SOUTHERN ANDEAN VOLCANIC ZONE / CHILE / PUYEHUE	63.44	1.46	77
ANDEAN ARC / SOUTHERN ANDEAN VOLCANIC ZONE / CHILE / PUYEHUE	60.19	2.31	79
ANDEAN ARC / SOUTHERN ANDEAN VOLCANIC ZONE / CHILE / PUYEHUE	65.66	1.03	80
ANDEAN ARC / SOUTHERN ANDEAN VOLCANIC ZONE / CHILE / PUYEHUE	52.04	5.99	80
ANDEAN ARC / SOUTHERN ANDEAN VOLCANIC ZONE / CHILE / PUYEHUE	58.98	3.47	81
ANDEAN ARC / SOUTHERN ANDEAN VOLCANIC ZONE / CHILE / PUYEHUE	51.87	5.98	84
ANDEAN ARC / SOUTHERN ANDEAN VOLCANIC ZONE / CHILE / PUYEHUE	63.93	1.81	84
ANDEAN ARC / SOUTHERN ANDEAN VOLCANIC ZONE / CHILE / PUYEHUE	54.1	4.58	88
ANDEAN ARC / SOUTHERN ANDEAN VOLCANIC ZONE / CHILE / PUYEHUE	64.66	1.44	88
ANDEAN ARC / SOUTHERN ANDEAN VOLCANIC ZONE / CHILE / PUYEHUE	57.07	2.99	89
ANDEAN ARC / SOUTHERN ANDEAN VOLCANIC ZONE / CHILE / PUYEHUE	59.49	2.38	90
ANDEAN ARC / SOUTHERN ANDEAN VOLCANIC ZONE / CHILE / PUYEHUE	56.64	3.25	90
ANDEAN ARC / SOUTHERN ANDEAN VOLCANIC ZONE / CHILE / PUYEHUE	53.08	5.5	90
ANDEAN ARC / SOUTHERN ANDEAN VOLCANIC ZONE / CHILE / PUYEHUE	48.24	16.33	94
ANDEAN ARC / SOUTHERN ANDEAN VOLCANIC ZONE / CHILE / PUYEHUE	51.26	5.84	100
ANDEAN ARC / SOUTHERN ANDEAN VOLCANIC ZONE / CHILE / PUYEHUE	54.7	4.22	100
ANDEAN ARC / SOUTHERN ANDEAN VOLCANIC ZONE / CHILE / PUYEHUE	54.8	3.34	101
ANDEAN ARC / SOUTHERN ANDEAN VOLCANIC ZONE / CHILE / PUYEHUE	58.09	2.79	104
ANDEAN ARC / SOUTHERN ANDEAN VOLCANIC ZONE / CHILE / PUYEHUE	52.64	4.24	110
ANDEAN ARC / SOUTHERN ANDEAN VOLCANIC ZONE / CHILE / PUYEHUE	56	3.14	118
ANDEAN ARC / SOUTHERN ANDEAN VOLCANIC ZONE / CHILE / PUYEHUE	55.77	6.03	119
ANDEAN ARC / SOUTHERN ANDEAN VOLCANIC ZONE / CHILE / PUYEHUE	54.96	3.96	124
ANDEAN ARC / SOUTHERN ANDEAN VOLCANIC ZONE / CHILE / PUYEHUE	53.04	5.44	127
ANDEAN ARC / SOUTHERN ANDEAN VOLCANIC ZONE / CHILE / PUYEHUE	52.04	6.13	128
ANDEAN ARC / SOUTHERN ANDEAN VOLCANIC ZONE / CHILE / PUYEHUE	52.72	5.25	133
ANDEAN ARC / SOUTHERN ANDEAN VOLCANIC ZONE / CHILE / PUYEHUE	50.84	5.64	133
ANDEAN ARC / SOUTHERN ANDEAN VOLCANIC ZONE / CHILE / PUYEHUE	51.25	6.79	134
ANDEAN ARC / SOUTHERN ANDEAN VOLCANIC ZONE / CHILE / PUYEHUE	53.58	3.81	141
ANDEAN ARC / SOUTHERN ANDEAN VOLCANIC ZONE / CHILE / PUYEHUE	52.91	4.73	146
ANDEAN ARC / SOUTHERN ANDEAN VOLCANIC ZONE / CHILE / PUYEHUE	56.05	3.27	156
ANDEAN ARC / SOUTHERN ANDEAN VOLCANIC ZONE / CHILE / PUYEHUE	52.64	4.15	160
ANDEAN ARC / SOUTHERN ANDEAN VOLCANIC ZONE / CHILE / PUYEHUE	53.68	4.91	161
ANDEAN ARC / SOUTHERN ANDEAN VOLCANIC ZONE / CHILE / PUYEHUE	56.12	3.62	175
ANDEAN ARC / SOUTHERN ANDEAN VOLCANIC ZONE / CHILE / PUYEHUE-CORDON CAULLE	69.17	0.61	19
ANDEAN ARC / SOUTHERN ANDEAN VOLCANIC ZONE / CHILE / PUYEHUE-CORDON CAULLE	68.72	0.69	21
ANDEAN ARC / SOUTHERN ANDEAN VOLCANIC ZONE / CHILE / PUYEHUE-CORDON CAULLE	67.6	0.84	22
ANDEAN ARC / SOUTHERN ANDEAN VOLCANIC ZONE / CHILE / PUYEHUE-CORDON CAULLE	69.12	0.69	23
ANDEAN ARC / SOUTHERN ANDEAN VOLCANIC ZONE / CHILE / QUETRUPILLAN VOLCANIC CENTER	64.32	1.23	10
ANDEAN ARC / SOUTHERN ANDEAN VOLCANIC ZONE / CHILE / QUETRUPILLAN VOLCANIC CENTER	64.32	1.23	10
ANDEAN ARC / SOUTHERN ANDEAN VOLCANIC ZONE / CHILE / QUETRUPILLAN VOLCANIC CENTER	64.32	1.23	10
ANDEAN ARC / SOUTHERN ANDEAN VOLCANIC ZONE / CHILE / QUETRUPILLAN VOLCANIC CENTER	64.32	1.23	10
ANDEAN ARC / SOUTHERN ANDEAN VOLCANIC ZONE / CHILE / QUETRUPILLAN VOLCANIC CENTER	64.32	1.23	10
ANDEAN ARC / SOUTHERN ANDEAN VOLCANIC ZONE / CHILE / QUETRUPILLAN VOLCANIC CENTER	64.32	1.23	10
ANDEAN ARC / SOUTHERN ANDEAN VOLCANIC ZONE / CHILE / QUETRUPILLAN VOLCANIC CENTER	64.32	1.23	20
ANDEAN ARC / SOUTHERN ANDEAN VOLCANIC ZONE / CHILE / QUETRUPILLAN VOLCANIC CENTER	64.32	1.23	20
ANDEAN ARC / SOUTHERN ANDEAN VOLCANIC ZONE / CHILE / QUIZAPU			0.459327
ANDEAN ARC / SOUTHERN ANDEAN VOLCANIC ZONE / CHILE / QUIZAPU			0.530022
ANDEAN ARC / SOUTHERN ANDEAN VOLCANIC ZONE / CHILE / QUIZAPU			0.568458
ANDEAN ARC / SOUTHERN ANDEAN VOLCANIC ZONE / CHILE / QUIZAPU			0.798097
ANDEAN ARC / SOUTHERN ANDEAN VOLCANIC ZONE / CHILE / QUIZAPU			0.86035
ANDEAN ARC / SOUTHERN ANDEAN VOLCANIC ZONE / CHILE / QUIZAPU			0.895948
ANDEAN ARC / SOUTHERN ANDEAN VOLCANIC ZONE / CHILE / QUIZAPU			1
ANDEAN ARC / SOUTHERN ANDEAN VOLCANIC ZONE / CHILE / QUIZAPU			1.01824
ANDEAN ARC / SOUTHERN ANDEAN VOLCANIC ZONE / CHILE / QUIZAPU			1.25827
ANDEAN ARC / SOUTHERN ANDEAN VOLCANIC ZONE / CHILE / QUIZAPU			1.80924
ANDEAN ARC / SOUTHERN ANDEAN VOLCANIC ZONE / CHILE / QUIZAPU			2
ANDEAN ARC / SOUTHERN ANDEAN VOLCANIC ZONE / CHILE / QUIZAPU			2.65739
ANDEAN ARC / SOUTHERN ANDEAN VOLCANIC ZONE / CHILE / QUIZAPU			3
ANDEAN ARC / SOUTHERN ANDEAN VOLCANIC ZONE / CHILE / QUIZAPU			3.27008
ANDEAN ARC / SOUTHERN ANDEAN VOLCANIC ZONE / CHILE / QUIZAPU			4
ANDEAN ARC / SOUTHERN ANDEAN VOLCANIC ZONE / CHILE / QUIZAPU			4
ANDEAN ARC / SOUTHERN ANDEAN VOLCANIC ZONE / CHILE / QUIZAPU			4.03459
ANDEAN ARC / SOUTHERN ANDEAN VOLCANIC ZONE / CHILE / QUIZAPU			4.03925
ANDEAN ARC / SOUTHERN ANDEAN VOLCANIC ZONE / CHILE / QUIZAPU			6
ANDEAN ARC / SOUTHERN ANDEAN VOLCANIC ZONE / CHILE / QUIZAPU			6
ANDEAN ARC / SOUTHERN ANDEAN VOLCANIC ZONE / CHILE / QUIZAPU	66.3	0.87	7
ANDEAN ARC / SOUTHERN ANDEAN VOLCANIC ZONE / CHILE / QUIZAPU			7
ANDEAN ARC / SOUTHERN ANDEAN VOLCANIC ZONE / CHILE / QUIZAPU			8
ANDEAN ARC / SOUTHERN ANDEAN VOLCANIC ZONE / CHILE / QUIZAPU			8
ANDEAN ARC / SOUTHERN ANDEAN VOLCANIC ZONE / CHILE / QUIZAPU			8
ANDEAN ARC / SOUTHERN ANDEAN VOLCANIC ZONE / CHILE / QUIZAPU			8
ANDEAN ARC / SOUTHERN ANDEAN VOLCANIC ZONE / CHILE / QUIZAPU	65.8	0.95	9
ANDEAN ARC / SOUTHERN ANDEAN VOLCANIC ZONE / CHILE / QUIZAPU	66.22	0.91	9
ANDEAN ARC / SOUTHERN ANDEAN VOLCANIC ZONE / CHILE / QUIZAPU	66.42	0.93	9
ANDEAN ARC / SOUTHERN ANDEAN VOLCANIC ZONE / CHILE / QUIZAPU	67.56	0.9	9.23144
ANDEAN ARC / SOUTHERN ANDEAN VOLCANIC ZONE / CHILE / QUIZAPU	65.89	0.95	10
ANDEAN ARC / SOUTHERN ANDEAN VOLCANIC ZONE / CHILE / QUIZAPU	67.25	0.89	10.405
ANDEAN ARC / SOUTHERN ANDEAN VOLCANIC ZONE / CHILE / QUIZAPU	66.74	0.85	11
ANDEAN ARC / SOUTHERN ANDEAN VOLCANIC ZONE / CHILE / QUIZAPU	67.87	0.84	11.4729
ANDEAN ARC / SOUTHERN ANDEAN VOLCANIC ZONE / CHILE / QUIZAPU	66.58	1.05	11.9332
ANDEAN ARC / SOUTHERN ANDEAN VOLCANIC ZONE / CHILE / QUIZAPU	66.64	0.88	12
ANDEAN ARC / SOUTHERN ANDEAN VOLCANIC ZONE / CHILE / QUIZAPU	66.41	0.86	12
ANDEAN ARC / SOUTHERN ANDEAN VOLCANIC ZONE / CHILE / QUIZAPU	65.71	0.99	12
ANDEAN ARC / SOUTHERN ANDEAN VOLCANIC ZONE / CHILE / QUIZAPU	66.58	0.95	12
ANDEAN ARC / SOUTHERN ANDEAN VOLCANIC ZONE / CHILE / QUIZAPU	66.5	0.87	12
ANDEAN ARC / SOUTHERN ANDEAN VOLCANIC ZONE / CHILE / QUIZAPU	66.94	0.81	12
ANDEAN ARC / SOUTHERN ANDEAN VOLCANIC ZONE / CHILE / QUIZAPU	67.7	0.82	12.7209
ANDEAN ARC / SOUTHERN ANDEAN VOLCANIC ZONE / CHILE / QUIZAPU	65.99	1.12	14
ANDEAN ARC / SOUTHERN ANDEAN VOLCANIC ZONE / CHILE / QUIZAPU	66.21	1.29	14.2913
ANDEAN ARC / SOUTHERN ANDEAN VOLCANIC ZONE / CHILE / QUIZAPU	67.59	1.08	15
ANDEAN ARC / SOUTHERN ANDEAN VOLCANIC ZONE / CHILE / QUIZAPU	66.63	0.97	15
ANDEAN ARC / SOUTHERN ANDEAN VOLCANIC ZONE / CHILE / QUIZAPU	66.85	0.93	15
ANDEAN ARC / SOUTHERN ANDEAN VOLCANIC ZONE / CHILE / QUIZAPU	65.27	1.31	16
ANDEAN ARC / SOUTHERN ANDEAN VOLCANIC ZONE / CHILE / QUIZAPU	66.82	0.96	16
ANDEAN ARC / SOUTHERN ANDEAN VOLCANIC ZONE / CHILE / QUIZAPU	66.07	1.28	17.2053
ANDEAN ARC / SOUTHERN ANDEAN VOLCANIC ZONE / CHILE / QUIZAPU	57.22	3.7	17.9522
ANDEAN ARC / SOUTHERN ANDEAN VOLCANIC ZONE / CHILE / QUIZAPU	63.29	1.7	18
ANDEAN ARC / SOUTHERN ANDEAN VOLCANIC ZONE / CHILE / QUIZAPU	65.37	1.5	18.2128
ANDEAN ARC / SOUTHERN ANDEAN VOLCANIC ZONE / CHILE / QUIZAPU	64.9	1.57	18.5238
ANDEAN ARC / SOUTHERN ANDEAN VOLCANIC ZONE / CHILE / QUIZAPU	64.67	1.34	19
ANDEAN ARC / SOUTHERN ANDEAN VOLCANIC ZONE / CHILE / QUIZAPU	57.39	3.58	19.2597
ANDEAN ARC / SOUTHERN ANDEAN VOLCANIC ZONE / CHILE / QUIZAPU	66.76	0.84	20
ANDEAN ARC / SOUTHERN ANDEAN VOLCANIC ZONE / CHILE / QUIZAPU			20
ANDEAN ARC / SOUTHERN ANDEAN VOLCANIC ZONE / CHILE / QUIZAPU			20
ANDEAN ARC / SOUTHERN ANDEAN VOLCANIC ZONE / CHILE / QUIZAPU	64.96	1.62	20.1105
ANDEAN ARC / SOUTHERN ANDEAN VOLCANIC ZONE / CHILE / QUIZAPU	64.32	1.65	20.3365
ANDEAN ARC / SOUTHERN ANDEAN VOLCANIC ZONE / CHILE / QUIZAPU	64.98	1.63	21.1923
ANDEAN ARC / SOUTHERN ANDEAN VOLCANIC ZONE / CHILE / QUIZAPU	65.01	1.53	21.2543
ANDEAN ARC / SOUTHERN ANDEAN VOLCANIC ZONE / CHILE / QUIZAPU	65.1	1.57	22.536
ANDEAN ARC / SOUTHERN ANDEAN VOLCANIC ZONE / CHILE / QUIZAPU	63.04	2.26	22.5715
ANDEAN ARC / SOUTHERN ANDEAN VOLCANIC ZONE / CHILE / QUIZAPU			24
ANDEAN ARC / SOUTHERN ANDEAN VOLCANIC ZONE / CHILE / QUIZAPU			24
ANDEAN ARC / SOUTHERN ANDEAN VOLCANIC ZONE / CHILE / QUIZAPU	64.73	1.54	25
ANDEAN ARC / SOUTHERN ANDEAN VOLCANIC ZONE / CHILE / QUIZAPU	61.89	2.63	25
ANDEAN ARC / SOUTHERN ANDEAN VOLCANIC ZONE / CHILE / QUIZAPU	60.78	2.51	27
ANDEAN ARC / SOUTHERN ANDEAN VOLCANIC ZONE / CHILE / QUIZAPU	61.16	2.8	27
ANDEAN ARC / SOUTHERN ANDEAN VOLCANIC ZONE / CHILE / QUIZAPU	63.88	1.7	28
ANDEAN ARC / SOUTHERN ANDEAN VOLCANIC ZONE / CHILE / QUIZAPU	57.83	2.81	29
ANDEAN ARC / SOUTHERN ANDEAN VOLCANIC ZONE / CHILE / QUIZAPU	61.85	2.48	29.2829
ANDEAN ARC / SOUTHERN ANDEAN VOLCANIC ZONE / CHILE / QUIZAPU	62.3	2.4	29.8329
ANDEAN ARC / SOUTHERN ANDEAN VOLCANIC ZONE / CHILE / QUIZAPU	61.28	2.39	30
ANDEAN ARC / SOUTHERN ANDEAN VOLCANIC ZONE / CHILE / QUIZAPU	59.84	3.21	30
ANDEAN ARC / SOUTHERN ANDEAN VOLCANIC ZONE / CHILE / QUIZAPU	61.91	2.48	34.6627
ANDEAN ARC / SOUTHERN ANDEAN VOLCANIC ZONE / CHILE / QUIZAPU	60.83	3	35.4743
ANDEAN ARC / SOUTHERN ANDEAN VOLCANIC ZONE / CHILE / QUIZAPU	57.59	2.91	37
ANDEAN ARC / SOUTHERN ANDEAN VOLCANIC ZONE / CHILE / QUIZAPU	59.65	3.29	37
ANDEAN ARC / SOUTHERN ANDEAN VOLCANIC ZONE / CHILE / QUIZAPU	61.56	2.4	39
ANDEAN ARC / SOUTHERN ANDEAN VOLCANIC ZONE / CHILE / QUIZAPU	57.37	3.05	40
ANDEAN ARC / SOUTHERN ANDEAN VOLCANIC ZONE / CHILE / QUIZAPU	59.52	2.99	40
ANDEAN ARC / SOUTHERN ANDEAN VOLCANIC ZONE / CHILE / QUIZAPU	60.75	2.33	41
ANDEAN ARC / SOUTHERN ANDEAN VOLCANIC ZONE / CHILE / QUIZAPU	59.34	3.09	43.75
ANDEAN ARC / SOUTHERN ANDEAN VOLCANIC ZONE / CHILE / QUIZAPU	57.34	3.63	45.283
ANDEAN ARC / SOUTHERN ANDEAN VOLCANIC ZONE / CHILE / QUIZAPU	61.37	2.52	46
ANDEAN ARC / SOUTHERN ANDEAN VOLCANIC ZONE / CHILE / QUIZAPU	53.85	4.76	48
ANDEAN ARC / SOUTHERN ANDEAN VOLCANIC ZONE / CHILE / QUIZAPU	59.24	3.17	48.9531
ANDEAN ARC / SOUTHERN ANDEAN VOLCANIC ZONE / CHILE / QUIZAPU	54.92	4.08	49
ANDEAN ARC / SOUTHERN ANDEAN VOLCANIC ZONE / CHILE / QUIZAPU	58.9	3.35	49.3597
ANDEAN ARC / SOUTHERN ANDEAN VOLCANIC ZONE / CHILE / QUIZAPU	56.92	3.75	52
ANDEAN ARC / SOUTHERN ANDEAN VOLCANIC ZONE / CHILE / QUIZAPU	55.41	4.67	55
ANDEAN ARC / SOUTHERN ANDEAN VOLCANIC ZONE / CHILE / QUIZAPU	55.34	4.5	58
ANDEAN ARC / SOUTHERN ANDEAN VOLCANIC ZONE / CHILE / QUIZAPU	54.27	4.77	59
ANDEAN ARC / SOUTHERN ANDEAN VOLCANIC ZONE / CHILE / QUIZAPU	56.78	3.56	62
ANDEAN ARC / SOUTHERN ANDEAN VOLCANIC ZONE / CHILE / QUIZAPU	55.26	4.61	63
ANDEAN ARC / SOUTHERN ANDEAN VOLCANIC ZONE / CHILE / QUIZAPU	54.54	4.86	63
ANDEAN ARC / SOUTHERN ANDEAN VOLCANIC ZONE / CHILE / QUIZAPU	52.57	5.35	66
ANDEAN ARC / SOUTHERN ANDEAN VOLCANIC ZONE / CHILE / QUIZAPU	57.32	3.6	67
ANDEAN ARC / SOUTHERN ANDEAN VOLCANIC ZONE / CHILE / QUIZAPU	52.12	5.43	71
ANDEAN ARC / SOUTHERN ANDEAN VOLCANIC ZONE / CHILE / QUIZAPU	54.42	4.72	82
ANDEAN ARC / SOUTHERN ANDEAN VOLCANIC ZONE / CHILE / QUIZAPU / MONDACA FLOW	69.75	0.44	7
ANDEAN ARC / SOUTHERN ANDEAN VOLCANIC ZONE / CHILE / QUIZAPU / MONDACA FLOW	70.1	0.46	9
ANDEAN ARC / SOUTHERN ANDEAN VOLCANIC ZONE / CHILE / SAN JORGE	50.39	10.4	88.6
ANDEAN ARC / SOUTHERN ANDEAN VOLCANIC ZONE / CHILE / SAN JOSE			26
ANDEAN ARC / SOUTHERN ANDEAN VOLCANIC ZONE / CHILE / SAN PEDRO			60.3747
ANDEAN ARC / SOUTHERN ANDEAN VOLCANIC ZONE / CHILE / SIERRA VELLUDA	56.46	3.57	22.83
ANDEAN ARC / SOUTHERN ANDEAN VOLCANIC ZONE / CHILE / SIERRA VELLUDA	54.42	3.52	25.15
ANDEAN ARC / SOUTHERN ANDEAN VOLCANIC ZONE / CHILE / SIERRA VELLUDA	58.67	2.88	35.57
ANDEAN ARC / SOUTHERN ANDEAN VOLCANIC ZONE / CHILE / SIERRA VELLUDA	54.62	2.73	41.55
ANDEAN ARC / SOUTHERN ANDEAN VOLCANIC ZONE / CHILE / SIERRA VELLUDA	58.2	2.46	43.9
ANDEAN ARC / SOUTHERN ANDEAN VOLCANIC ZONE / CHILE / SIERRA VELLUDA	57.14	3.46	47.53
ANDEAN ARC / SOUTHERN ANDEAN VOLCANIC ZONE / CHILE / SIERRA VELLUDA	53.46	4.14	49.2
ANDEAN ARC / SOUTHERN ANDEAN VOLCANIC ZONE / CHILE / SIERRA VELLUDA	55.15	5.08	49.2
ANDEAN ARC / SOUTHERN ANDEAN VOLCANIC ZONE / CHILE / SIERRA VELLUDA	51.62	4.72	51.88
ANDEAN ARC / SOUTHERN ANDEAN VOLCANIC ZONE / CHILE / SOUTH MINCHINMAVIDA	50.62	8.14	48
ANDEAN ARC / SOUTHERN ANDEAN VOLCANIC ZONE / CHILE / TINGUIRIRICA			69.4317
ANDEAN ARC / SOUTHERN ANDEAN VOLCANIC ZONE / CHILE / TRONADOR VOLCANIC GROUP	63.87	1.19	11
ANDEAN ARC / SOUTHERN ANDEAN VOLCANIC ZONE / CHILE / TRONADOR VOLCANIC GROUP	51.46	6.69	74
ANDEAN ARC / SOUTHERN ANDEAN VOLCANIC ZONE / CHILE / TRONADOR VOLCANIC GROUP	52.67	5.34	81
ANDEAN ARC / SOUTHERN ANDEAN VOLCANIC ZONE / CHILE / TRONADOR VOLCANIC GROUP	52.49	5.37	87
ANDEAN ARC / SOUTHERN ANDEAN VOLCANIC ZONE / CHILE / TRONADOR VOLCANIC GROUP	53.65	3.76	90
ANDEAN ARC / SOUTHERN ANDEAN VOLCANIC ZONE / CHILE / TRONADOR VOLCANIC GROUP	49.41	6.1	102
ANDEAN ARC / SOUTHERN ANDEAN VOLCANIC ZONE / CHILE / TRONADOR VOLCANIC GROUP	60.95	1.49	102
ANDEAN ARC / SOUTHERN ANDEAN VOLCANIC ZONE / CHILE / TRONADOR VOLCANIC GROUP	51.92	4.61	107
ANDEAN ARC / SOUTHERN ANDEAN VOLCANIC ZONE / CHILE / TRONADOR VOLCANIC GROUP	49.89	5.62	112
ANDEAN ARC / SOUTHERN ANDEAN VOLCANIC ZONE / CHILE / TRONADOR VOLCANIC GROUP	55	2.74	116
ANDEAN ARC / SOUTHERN ANDEAN VOLCANIC ZONE / CHILE / TRONADOR VOLCANIC GROUP	55.2	2.82	118
ANDEAN ARC / SOUTHERN ANDEAN VOLCANIC ZONE / CHILE / TRONADOR VOLCANIC GROUP	50.41	4.92	118
ANDEAN ARC / SOUTHERN ANDEAN VOLCANIC ZONE / CHILE / TRONADOR VOLCANIC GROUP	56.66	2.34	158
ANDEAN ARC / SOUTHERN ANDEAN VOLCANIC ZONE / CHILE / TRONADOR VOLCANIC GROUP	48.87	5.34	159
ANDEAN ARC / SOUTHERN ANDEAN VOLCANIC ZONE / CHILE / TRONADOR VOLCANIC GROUP	52.02	3.35	188
ANDEAN ARC / SOUTHERN ANDEAN VOLCANIC ZONE / CHILE / TUPUNGATITO			19.3789
ANDEAN ARC / SOUTHERN ANDEAN VOLCANIC ZONE / CHILE / VILLARRICA (RUCAPILLAN)	69.16	0.54	13
ANDEAN ARC / SOUTHERN ANDEAN VOLCANIC ZONE / CHILE / VILLARRICA (RUCAPILLAN)	55.06	3.92	63
ANDEAN ARC / SOUTHERN ANDEAN VOLCANIC ZONE / CHILE / VILLARRICA (RUCAPILLAN)			71.1
ANDEAN ARC / SOUTHERN ANDEAN VOLCANIC ZONE / CHILE / VILLARRICA (RUCAPILLAN)	52.5	5.07	78.6
ANDEAN ARC / SOUTHERN ANDEAN VOLCANIC ZONE / CHILE / VILLARRICA (RUCAPILLAN)	51.37	5.73	79
ANDEAN ARC / SOUTHERN ANDEAN VOLCANIC ZONE / CHILE / VILLARRICA (RUCAPILLAN)			81.5
ANDEAN ARC / SOUTHERN ANDEAN VOLCANIC ZONE / CHILE / VILLARRICA (RUCAPILLAN)	51.64	5.09	86
ANDEAN ARC / SOUTHERN ANDEAN VOLCANIC ZONE / CHILE / VILLARRICA (RUCAPILLAN)	52.62	4.83	87
ANDEAN ARC / SOUTHERN ANDEAN VOLCANIC ZONE / CHILE / VILLARRICA (RUCAPILLAN)	51.16	6.43	87.2
ANDEAN ARC / SOUTHERN ANDEAN VOLCANIC ZONE / CHILE / VILLARRICA (RUCAPILLAN)	51.98	4.68	91
ANDEAN ARC / SOUTHERN ANDEAN VOLCANIC ZONE / CHILE / VILLARRICA (RUCAPILLAN)	53.1	4.15	93
ANDEAN ARC / SOUTHERN ANDEAN VOLCANIC ZONE / CHILE / VILLARRICA (RUCAPILLAN)	52.9	3.76	93.5
ANDEAN ARC / SOUTHERN ANDEAN VOLCANIC ZONE / CHILE / VILLARRICA (RUCAPILLAN)	49.1	9.44	94
ANDEAN ARC / SOUTHERN ANDEAN VOLCANIC ZONE / CHILE / VILLARRICA (RUCAPILLAN)	51.38	6.27	94.3
ANDEAN ARC / SOUTHERN ANDEAN VOLCANIC ZONE / CHILE / VILLARRICA (RUCAPILLAN)			97
ANDEAN ARC / SOUTHERN ANDEAN VOLCANIC ZONE / CHILE / VILLARRICA (RUCAPILLAN)	52.93	4.03	97
ANDEAN ARC / SOUTHERN ANDEAN VOLCANIC ZONE / CHILE / VILLARRICA (RUCAPILLAN)	53.08	3.89	98.3
ANDEAN ARC / SOUTHERN ANDEAN VOLCANIC ZONE / CHILE / VILLARRICA (RUCAPILLAN)			99.6
ANDEAN ARC / SOUTHERN ANDEAN VOLCANIC ZONE / CHILE / VILLARRICA (RUCAPILLAN)	52.4384	5.04637	101.652
ANDEAN ARC / SOUTHERN ANDEAN VOLCANIC ZONE / CHILE / VILLARRICA (RUCAPILLAN)	52.83	3.88	103
ANDEAN ARC / SOUTHERN ANDEAN VOLCANIC ZONE / CHILE / VILLARRICA (RUCAPILLAN)	53.01	4.02	103
ANDEAN ARC / SOUTHERN ANDEAN VOLCANIC ZONE / CHILE / VILLARRICA (RUCAPILLAN)	53.0131	4.02086	103.292
ANDEAN ARC / SOUTHERN ANDEAN VOLCANIC ZONE / CHILE / VILLARRICA (RUCAPILLAN)	53.39	4.58	105
ANDEAN ARC / SOUTHERN ANDEAN VOLCANIC ZONE / CHILE / VILLARRICA (RUCAPILLAN)	53.04	3.98	106
ANDEAN ARC / SOUTHERN ANDEAN VOLCANIC ZONE / CHILE / VILLARRICA (RUCAPILLAN)	53.05	3.9	113.2
ANDEAN ARC / SOUTHERN ANDEAN VOLCANIC ZONE / CHILE / VILLARRICA (RUCAPILLAN)			126
ANDEAN ARC / SOUTHERN ANDEAN VOLCANIC ZONE / CHILE / VILLARRICA (RUCAPILLAN)	55.28	4.08	131
ANDEAN ARC / SOUTHERN ANDEAN VOLCANIC ZONE / CHILE / VILLARRICA (RUCAPILLAN)			133
ANDEAN ARC / SOUTHERN ANDEAN VOLCANIC ZONE / CHILE / VILLARRICA (RUCAPILLAN)	51.44	7.36	133
ANDEAN ARC / SOUTHERN ANDEAN VOLCANIC ZONE / CHILE / VILLARRICA (RUCAPILLAN)	51.438	7.3597	133.161
ANDEAN ARC / SOUTHERN ANDEAN VOLCANIC ZONE / CHILE / VILLARRICA (RUCAPILLAN)			134
ANDEAN ARC / SOUTHERN ANDEAN VOLCANIC ZONE / CHILE / VILLARRICA (RUCAPILLAN)			138
ANDEAN ARC / SOUTHERN ANDEAN VOLCANIC ZONE / CHILE / VILLARRICA (RUCAPILLAN)	52.141	5.98486	149.739
ANDEAN ARC / SOUTHERN ANDEAN VOLCANIC ZONE / CHILE / VILLARRICA (RUCAPILLAN)			155
ANDEAN ARC / SOUTHERN ANDEAN VOLCANIC ZONE / CHILE / VILLARRICA (RUCAPILLAN)	52.69	5.74	160
ANDEAN ARC / SOUTHERN ANDEAN VOLCANIC ZONE / CHILE / VILLARRICA (RUCAPILLAN)	51.39	5.33	164
